# Supplementary material for: Assessment of the quality of reporting for treatment components in Cochrane reviews of acupuncture
Source: PubMed Central journal article supplement — BMJ Open. 2014 Jan 17;4(1):e004136. doi: 10.1136/bmjopen-2013-004136 (PMC3902460; doi:10.1136/bmjopen-2013-004136), 2014-01-17
Supplement: bmjopen-2013-004136.draft_revisions.pdf [file bmjopen-2013-004136.draft_revisions.pdf]

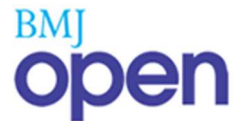

**Assessment of the quality of reporting for treatment components in Cochrane reviews of acupuncture**

|                                 |                                                                                                                                                                                                                                                                                                                                                                                                        |
|---------------------------------|--------------------------------------------------------------------------------------------------------------------------------------------------------------------------------------------------------------------------------------------------------------------------------------------------------------------------------------------------------------------------------------------------------|
| Journal:                        | <i>BMJ Open</i>                                                                                                                                                                                                                                                                                                                                                                                        |
| Manuscript ID:                  | bmjopen-2013-004136                                                                                                                                                                                                                                                                                                                                                                                    |
| Article Type:                   | Research                                                                                                                                                                                                                                                                                                                                                                                               |
| Date Submitted by the Author:   | 28-Sep-2013                                                                                                                                                                                                                                                                                                                                                                                            |
| Complete List of Authors:       | Kim, Kun Hyung; School of Korean Medicine, Pusan National University, Department of Acupuncture and Moxibustion<br>Kang, Jung Won; College of Korean Medicine, Kyung Hee University, Department of Acupuncture and Moxibustion<br>Lee, Myeong Soo; Korea Institute of Oriental Medicine,<br>Lee, Jae Dong; College of Korean Medicine, Kyung Hee University, Department of Acupuncture and Moxibustion |
| <b>Primary Subject Heading</b>: | Complementary medicine                                                                                                                                                                                                                                                                                                                                                                                 |
| Secondary Subject Heading:      | Research methods, Complementary medicine                                                                                                                                                                                                                                                                                                                                                               |
| Keywords:                       | COMPLEMENTARY MEDICINE, STATISTICS & RESEARCH METHODS, MEDICAL EDUCATION & TRAINING                                                                                                                                                                                                                                                                                                                    |
|                                 |                                                                                                                                                                                                                                                                                                                                                                                                        |

SCHOLARONE™  
Manuscripts

1  
2  
3 **Assessment of the quality of reporting for treatment components**  
4  
5  
6 **in Cochrane reviews of acupuncture**  
7  
8

9  
10  
11 Kun Hyung Kim<sup>1</sup>, Jung Won Kang<sup>2</sup>, Myeong Soo Lee<sup>3</sup>, Jae Dong Lee<sup>2</sup>

12  
13 <sup>1</sup>*Division of Clinical Medicine, School of Korean Medicine, Pusan National University, Yangsan,*  
14 *South Korea*

15  
16 <sup>2</sup>*Department of Acupuncture & Moxibustion, College of Oriental Medicine, Kyung Hee University,*  
17 *Seoul, Republic of Korea*

18  
19 <sup>3</sup>*Medical Research Division, Korea Institute of Oriental Medicine, Daejeon, South Korea*  
20  
21

22  
23 **Running Title:** STRICTA for Cochrane reviews of acupuncture  
24

25  
26 **Source of support:** This work was supported by the Korea Institute of Oriental Medicine  
27 (K10101).  
28

29  
30 **Financial Disclosure:** None

31  
32 **Keywords:** acupuncture, Cochrane review, systematic review, STRICTA, CONSORT,  
33 reporting guideline  
34  
35

36  
37  
38 **Corresponding author :**

39  
40 Jae Dong Lee, KMD., PhD.

41  
42 Department of Acupuncture & Moxibustion, College of Korean Medicine

43  
44 Kyung Hee University,

45  
46 Seoul, 130-872, South Korea

47  
48 Tel : 82-(0) 2-958-9207

49  
50 Fax: 82-(0) 2-958-9211

51  
52 E-mail:ljdacu@gmail.com  
53  
54  
55  
56  
57  
58  
59  
60

## Abstract

**Objectives:** High quality reporting of treatment details can aid replication of study results in real-world clinical practice. The Standards for Reporting Interventions in Clinical Trials of Acupuncture (STRICTA) is a reporting guideline for key elements of acupuncture interventions in clinical trials. This study used STRICTA to investigate whether Cochrane reviews of acupuncture adequately report important treatment details.

**Design:** Systematic review

**Methods:** Cochrane reviews of acupuncture were identified from *The Cochrane Library* (Issue 7, 2012). Randomized controlled trials (RCTs) included in the reviews and published after 2005 were obtained. Using STRICTA, we extracted acupuncture-related information from both the Cochrane reviews and the RCTs. The Characteristics of included studies table was the major source of intervention information from Cochrane reviews. Reporting quality of acupuncture interventions in Cochrane reviews was assessed and compared to the respective RCTs.

**Results:** 25 Cochrane reviews of acupuncture and 92 RCTs met the selection criteria. Cochrane reviews were 16% less likely to report the acupuncture-related items of STRICTA than RCTs (risk ratio 0.84, 95% confidence interval 0.79 to 0.88,  $I^2=8\%$ ). Information was significantly better reported for 10 of the 15 treatment-group items of STRICTA in RCTs than in Cochrane reviews ( $p<0.05$ ), while four items did so without statistical significance. One item related to practitioner background was significantly better reported in Cochrane reviews.

**Conclusion:** Reporting quality of treatment details in Cochrane reviews of acupuncture was insufficient with regard to STRICTA, even though such information was readily reported in RCTs. The overall quality of reporting of the RCTs, while better than the reviews, was also often suboptimal. Use of STRICTA guideline during the review process is recommended to adequately report the key treatment components in Cochrane reviews of acupuncture. The

1  
2  
3 potential impact of STRICTA to the replicability and utilization of reviews in future research  
4  
5 and practice needs to be investigated.  
6  
7  
8

9  
10 **Strengths and limitations of this study**

- 11
- 12 • This study is the first investigation that revealed the avoidable incompleteness of  
13 reporting quality with regard to important treatment components of acupuncture in the  
14 Cochrane reviews, even though information was readily reported in relevant primary  
15 RCTs.  
16  
17
  - 18 • Our findings suggest there is a loss of treatment-related information during data  
19 abstraction for Cochrane reviews which may influence the replicability of trial  
20 interventions.  
21  
22
  - 23 • Whether loss of treatment-related information actually leads to the altered  
24 replicability of reported interventions in Cochrane reviews was not investigated.  
25  
26  
27  
28  
29  
30  
31  
32  
33  
34  
35  
36  
37  
38  
39  
40  
41  
42  
43  
44  
45  
46  
47  
48  
49  
50  
51  
52  
53  
54  
55  
56  
57  
58  
59  
60

## Background

Cochrane systematic reviews have summaries of study characteristics, which aim to include details of study interventions to be replicated in practice.<sup>1</sup> Developing methods to improve the descriptions of complex interventions are considered as essential task to complement existing systematic review methodology.<sup>2</sup> Therefore, adherence to international standards for reporting interventions might be helpful for detailed description of study interventions in Characteristics summaries in Cochrane systematic reviews. The Standards for Reporting Interventions in Clinical Trials of Acupuncture (STRICTA) is an internationally recommended standard for reporting details of acupuncture interventions in clinical trials of acupuncture. It can be used to provide sufficient information for researchers or clinicians to understand acupuncture interventions used in the study and replicate them in other researches or practices.<sup>3</sup> Consolidated Standards of Reporting Trials (CONSORT) for non-pharmacological treatments has also suggested to provide detailed information for study interventions thus to improve the uptake of study results in studies of complex interventions, including surgery, psychological interventions and acupuncture.<sup>4</sup> However, many current trials and reviews have been found to often omit crucial details of non-pharmacological treatments.<sup>5</sup> In case of Cochrane reviews, clear description on the intervention of interests has been emphasized to improve applicability of review into real clinical practice.<sup>6</sup> To the best of our knowledge, however, there is no study assessing whether Cochrane reviews provide satisfactory description on any particular intervention by adopting standards for reporting interventions. Although previous researches focused on managing the reporting quality of Cochrane review in terms of methodological process,<sup>7</sup> the reporting quality for interventions in Cochrane review had been largely ignored. Hence, this study aimed to assess the reporting quality of acupuncture treatment-related information in the Cochrane reviews of acupuncture, as well as to investigate whether utilization of the reporting guideline for treatment

1  
2  
3  
4  
5  
6  
7  
8  
9  
10  
11  
12  
13  
14  
15  
16  
17  
18  
19  
20  
21  
22  
23  
24  
25  
26  
27  
28  
29  
30  
31  
32  
33  
34  
35  
36  
37  
38  
39  
40  
41  
42  
43  
44  
45  
46  
47  
48  
49  
50  
51  
52  
53  
54  
55  
56  
57  
58  
59  
60

intervention can improve the quality of reporting in Cochrane reviews of acupuncture.

For peer review only

## Methods

### Search strategy and selection criteria for Cochrane reviews of acupuncture

Cochrane Database of Systematic Reviews (CDSR) of Issue 7, March 2012 were searched to identify Cochrane reviews of acupuncture using the term “acupuncture”. Cochrane reviews that investigated acupuncture as a primary treatment intervention or as one of various treatment or control interventions with at least one primary component study that assessed the effects of acupuncture were included. Reviews without any included study (i.e., empty reviews) or reviews that did not include acupuncture-related studies were excluded.

### Search strategy and selection criteria for component studies in eligible Cochrane reviews of acupuncture

Component study was defined as a study included in the Cochrane review regardless of the contribution to the qualitative or quantitative analyses. These were searched using the reference citation information provided in the relevant Cochrane reviews. Among studies in eligible Cochrane systematic reviews, only trials published since 2005 were considered to be analyzed in this study. This is because of the possible necessary time-span for uptake of STRICTA guideline. This approach is similar to the work of Prady et al. (2008) which analyzed acupuncture studies published after 3 to 4 years following the publication of STRICTA.<sup>8</sup> Component studies which involved the assessment of acupuncture as a treatment or control intervention were eligible in our study. The term “acupuncture” was defined as interventions involving penetration of certain points on the skin by needling regardless of manual or electrical stimulation, since the needling is believed to be the most representative feature of acupuncture and STRICTA items were originally developed for the reporting of needle acupuncture in clinical studies.<sup>3</sup> Thus, component studies using other types of non-penetrating stimulation on acupuncture points, such as laser acupuncture, acupressure,

1  
2  
3 device-involved acupuncture point stimulation (i.e., wrist band application) and injections on  
4  
5 acupuncture points were excluded. Studies employing stimulation on non-classical  
6  
7 acupuncture points, such as trigger points, were eligible only if they clearly mentioned the  
8  
9 intervention was “acupuncture” in the review.  
10

### 11 12 13 14 **Data extraction in Cochrane reviews of acupuncture**

15  
16 Intervention details for acupuncture treatments in tables for characteristics of included  
17  
18 component studies were extracted in each Cochrane review. Characteristics of included  
19  
20 component studies were chosen for the main data source of our analysis because they intend  
21  
22 to provide sufficient information on various study components including details of  
23  
24 interventions to enable readers to understand the study better or replicate interventions in  
25  
26 their own contexts.<sup>1</sup> Methods and results of the included Cochrane reviews were also  
27  
28 examined to identify further acupuncture-related information which was not reported in the  
29  
30 tables. Two independent authors underwent these processes.  
31  
32

33  
34 General characteristics of each component study, including publication languages (English or  
35  
36 non-English), type of control groups in primary component studies, publication or last-  
37  
38 updated years and number of included studies in the Cochrane reviews were extracted.  
39  
40 Whether clinical heterogeneity related to the acupuncture treatments were planned to be  
41  
42 investigated by subgroup, sensitivity or other analysis regardless of the availability of those  
43  
44 analyses were also identified. One review author conducted these processes.  
45  
46  
47  
48

### 49 50 **Data extraction in component studies**

51  
52 For included studies to be analyzed, full-texts were obtained to check whether there is any  
53  
54 difference of reported information for acupuncture treatments in terms of STRICTA items  
55  
56 between the primary component studies and the Cochrane review. This was done to identify  
57  
58  
59  
60



1  
2  
3 any selective omission of treatment-related information by the Cochrane review author.  
4  
5 Published protocols or supplements of included studies for more detail information were  
6  
7 further sought when the primary component studies had relevant information for tracking  
8  
9 such data (i.e., citation information in the reference or web-appendix provided by the  
10  
11 component study).  
12

### 13 14 15 16 **Selection of STRICTA items for data extraction**

17  
18 Acupuncture-related items of STRICTA were used to assess the quality of reporting for  
19  
20 acupuncture treatment-related information in Cochrane reviews of acupuncture. Items with  
21  
22 regard to the description of the comparison interventions were not used, because the main  
23  
24 interest of this review was to assess the completeness of description of the acupuncture  
25  
26 treatment itself. The revised STRICTA checklist published in 2010 served as a primary  
27  
28 source of extraction form of acupuncture-related information.<sup>3</sup>  
29  
30  
31  
32  
33

### 34 **Rating methods of items in STRICTA**

35  
36 Each item of STRICTA was rated with a dichotomous scale (i.e., “reported” or “not  
37  
38 reported”). The rating of “reported” was given when relevant information is at least partially  
39  
40 reported in the Cochrane review or primary component studies. The rating of “not reported”  
41  
42 was given when relevant information is completely lacked in the Cochrane reviews or  
43  
44 primary component studies. When there is written evidence in the Cochrane review that the  
45  
46 review authors attempted to report and sought the relevant information but could not find it in  
47  
48 the component study, the item was rated as successfully reported one in the Cochrane review.  
49  
50 Our approach is in line with the Preferred Reporting Items for Systematic Reviews and Meta-  
51  
52 Analyses (PRISMA) statements that stressed the importance of reporting all variables for  
53  
54 which data were sought, regardless of its availability in the component  
55  
56  
57  
58  
59  
60

1  
2  
3 studies.<sup>7</sup> STRICTA recommends reporting of actually performed acupuncture intervention,  
4 rather than reporting of treatment protocols without any evidence of implementation.  
5  
6  
7 However, we assumed the reporting of Cochrane reviews or of component studies as  
8 performed, because distinctions were not clear in most cases.  
9  
10

### 11 12 13 14 **Inquiries to the review authors and review groups**

15  
16 One author (KKH) visited websites of relevant Cochrane review groups (CRGs) to see  
17 whether any reporting guidelines for acupuncture-related intervention were provided for  
18 review authors. (accessed at 12<sup>th</sup> July 2012) E-mail queries were also sent to the contact point  
19 of CRGs as well as to the correspondence of the included Cochrane reviews. Two questions  
20 were used for the survey, as follows: “Do your CRG have a policy or specific  
21 recommendations about the reporting details of acupuncture interventions for review authors?  
22 If any, please specify” and “Have you ever recommended any specific guideline for reporting  
23 details of acupuncture interventions for the review to review authors? If any, please specify”,  
24 respectively. This was done to check if CRGs or review authors had been aware the existence  
25 of reporting guidelines of acupuncture (i.e., STRICTA), had or had been recommended to use  
26 reporting guidelines for detailed description of interventions regarding acupuncture.  
27  
28  
29  
30  
31  
32  
33  
34  
35  
36  
37  
38  
39  
40  
41  
42

### 43 **Training of trial assessors**

44  
45 Two reviewers (KHK and JWK), both experienced acupuncture researchers and systematic  
46 reviewers, received training on STRICTA assessment checklists. The training course aimed to  
47 minimize inconsistency in data extraction and scoring. Ten trials in the Cochrane reviews that  
48 were published before 2005 thus excluded in our analyses were randomly selected for initial  
49 scoring by both reviewers. Two reviewers independently assessed and scored the quality of  
50 reporting in terms of acupuncture treatment-related information of ten component trials in the  
51  
52  
53  
54  
55  
56  
57  
58  
59  
60

1  
2  
3 Cochrane reviews. Following this, we attempted to develop and re-assure the standardized  
4  
5 scoring instruction for the main analysis.  
6  
7  
8

### 9 10 **Statistical analysis**

11  
12 The number of items rated as “reported” in the Cochrane review was compared with those in  
13  
14 the relevant primary component studies. Results were presented as risk ratios (RR) with 95%  
15  
16 confidence intervals (CI). Random effects model was used, and heterogeneity was analysed  
17  
18 using a Chi<sup>2</sup> test on N-1 degrees of freedom, with an alpha of 0.05 used for statistical  
19  
20 significance and with the I<sup>2</sup> statistic. The number and proportion of component studies in the  
21  
22 Cochrane reviews and the original RCTs that reported information for each STRICTA item  
23  
24 was compared using the McNemar test as percentage reported with binomial 95% confidence  
25  
26 intervals. STATA version 10.0 (Stata-Corp, College Station, Texas) and RevMan 5.2 (The  
27  
28 Nordic Cochrane Centre, Copenhagen) was used for statistical analyses and the forest plot,  
29  
30 respectively.  
31  
32  
33  
34  
35  
36  
37  
38  
39  
40  
41  
42  
43  
44  
45  
46  
47  
48  
49  
50  
51  
52  
53  
54  
55  
56  
57  
58  
59  
60

## Results

Totally 74 Cochrane reviews were identified following the search of CDSR, of which 26 reviews with 96 component studies were deemed to be eligible. Among them, one review and three component studies were excluded from the analysis, because of the wrong citation (n=3) and no accessibility (n=1) of component studies that resulted in the analysis of 25 reviews and 92 component studies.(Figure 1) General characteristics of included reviews and those of component studies are provided in Table 1.

### Study characteristics

Of the 25 included Cochrane reviews of acupuncture, 17 reviews (68%) evaluated acupuncture as a primary intervention of interest. The median value of publication year or year that last update were performed was 2010. 12 reviews (48%) attempted to investigate the clinical heterogeneity related to acupuncture treatment by the means of subgroup, sensitivity or other type of analysis (i.e., acupuncture adequacy test).

Of the 92 component studies, 58 studies (63%) were published in English. The median value of publication year of component studies published after 2005 was 2007. Type of comparison to acupuncture was non-acupuncture interventions (n=68, 74%), sham acupuncture (n=34, 37%) and active acupuncture treatments (n=14, 15%). Details of characteristics for Cochrane acupuncture reviews and component studies are provided in Table 2.

### Review policy or recommendations for the reporting acupuncture intervention

No CRG policy or recommendations given to the review author for reporting of acupuncture treatment were identified by an e-mail survey to the CRG correspondence or review authors. Five of 16 CRGs replied that the Cochrane Handbook should serve as a general standard guideline for reporting in the review, although no detailed instructions or any

1  
2  
3 recommendations for reporting the details or at least core components of complex  
4 interventions such as acupuncture were provided to authors. One CRG of the Cochrane  
5 review that did not evaluate acupuncture as primary intervention reported that they sought the  
6 feedback from an acupuncture specialist during editorial process. Less than half of reviewers  
7 (44%) reported that they were aware of STRICTA and only 16% of reviewers had utilized  
8 STRICTA during the review process. Reviewers did not receive either recommendation or  
9 restriction in terms of reporting acupuncture treatment during their review process (Table 2).  
10  
11  
12  
13  
14  
15  
16  
17  
18  
19

### 20 21 **STRICTA reporting in the Cochrane reviews and in the component studies**

22 Risk ratio of the reporting rate of STRICTA items was 0.84 (95% confidence interval 0.79 to  
23 0.88,  $I^2=8\%$ ), indicating that Cochrane reviews were 16% less likely to report the  
24 acupuncture-related items of STRICTA than component RCTs (Figure 2). Information was  
25 significantly better reported for 10 of the 15 acupuncture treatment-related items of STRICTA  
26 in RCTs than in Cochrane reviews ( $p<0.05$ ), while four items did so without statistical  
27 significance (Table 3). The most significant difference of reporting rate was found for the  
28 item A2 (reasoning of treatment) and B9 (needle type) with better reporting in 39.1 % and  
29 45.7 % of RCTs, respectively. One item (E1) related to practitioner background was  
30 significantly better reported in Cochrane reviews. Four items including A2 (reasoning of  
31 treatment), B4 (depth of insertion), D1 (details of other treatments) and D2 (setting and  
32 context) were reported in less than half of component studies in the Cochrane reviews and of  
33 RCTs.  
34  
35  
36  
37  
38  
39  
40  
41  
42  
43  
44  
45  
46  
47  
48  
49  
50  
51  
52  
53  
54  
55  
56  
57  
58  
59  
60

## Discussion

This study is the first systematic investigation of selective reporting in terms of details of interventions in the Cochrane reviews of acupuncture. We found some items which have been regarded as core components of acupuncture treatments were not reported in the Cochrane review, even though those information was already reported in the component RCTs. Details of interventions were significantly better reported in the RCTs in most items of STRICTA. This was achieved without further contact of authors of RCTs, which might imply the improvement of the reporting quality in terms of intervention details could be achieved directly by adopting STRICTA as a guideline for data abstraction by reviewers, editorials and peer-reviewers. However, no specific recommendation or guidelines for review authors were provided by CRG, and only minor portion of review authors or members of CRGs were identified to be aware of the existing CONSORT extension version of acupuncture. Overall, there is an insufficient reporting of acupuncture details which could have been improved if the existing reporting guidelines were well utilized in the review process.

In our review, less reporting of treatment-related information in the Cochrane reviews was observed in most of selected STRICTA items. To some extent, missing details of complex intervention might be inevitable during abstraction of information due to the complexity in practice.<sup>5</sup> However, some items showed almost compatible or even better reporting quality in the Cochrane reviews than in the RCTs. For example, information regarding the practitioner qualification was relatively well-reported (over 60% of component studies). Some of mechanical aspects of acupuncture treatments were also relatively well-reported both in Cochrane reviews and primary component studies, although some showed modest reporting quality both in Cochrane reviews and RCTs. Item B9 (Needle type) showed the most difference (45.7% difference) of reporting rates between Cochrane reviews and primary

1  
2  
3 component studies. This is in line with the previous research that common missing element of  
4  
5 non-pharmacological interventions in randomized controlled trials were materials necessary  
6  
7 to provide the intervention (51%) and details about intervention-related procedures (46%)  
8  
9 published in six major general medical journals.<sup>10</sup> On the contrary, poor reporting of  
10  
11 contextual factors (D1; details of other treatments, D2; setting and context, D3; Patient-  
12  
13 practitioner interaction) was obvious both in Cochrane reviews and primary component  
14  
15 studies. Although treatment context can have a significant influence on treatment effects,<sup>11</sup>  
16  
17 reporting information related to study contexts and patient-practitioner interactions seems to  
18  
19 have been largely ignored by researchers of complex intervention.<sup>12</sup> Since acupuncture is a  
20  
21 practitioner-dependent, non-pharmacological complex intervention,<sup>13</sup> sufficient details of  
22  
23 intervention delivered and study contexts might be of particular importance to enable readers  
24  
25 to consider the application and reproduction of review results in different treatment settings.<sup>12</sup>  
26  
27  
28 Items that explain theoretical background of acupuncture intervention were also largely  
29  
30 underreported in Cochrane reviews of acupuncture, although theoretically-derived therapeutic  
31  
32 actions or strategies in complex interventions such as acupuncture may also have an  
33  
34 important role in constituting overall therapeutic effects.<sup>13</sup> It is still unclear for acupuncture  
35  
36 which component exerts therapeutic effects which combination of potential therapeutic  
37  
38 components works best, or whether combination of several components during the  
39  
40 acupuncture treatment is additive or synergistic.<sup>14</sup> Therefore, it would be a reasonable  
41  
42 suggestion for reviewers to report component factors of acupuncture that seems potentially  
43  
44 contributable to the effectiveness which are well-represented in STRICTA, until future  
45  
46 researches elucidate the therapeutic role of each component or group of components in the  
47  
48 acupuncture treatment.  
49  
50  
51  
52  
53  
54  
55  
56  
57  
58  
59  
60

1  
2  
3 One possible explanation of inconsistent and suboptimal reporting of acupuncture treatment-  
4 related information would be that the Cochrane reviewers might not perceive some items of  
5 STRICTA as relevant to their review and selectively depicted some items of STRICTA. In a  
6  
7 small survey of Prady et al., some trialists and Cochrane review authors did not perceive  
8  
9 some items of the previous version of STRICTA as relevant to acupuncture treatments.<sup>15</sup>  
10  
11

12  
13  
14 Another reason might be a lack of standard reporting guideline for interventions in the  
15  
16 Cochrane review. Either Cochrane review authors or CRG correspondence reported that they  
17  
18 did not know the existence of reporting guidelines for acupuncture. To date, however, there is  
19  
20 no study investigating reasons for the selective reporting intervention-related information  
21  
22 (including acupuncture) in Cochrane reviews. Since information related to the treatment  
23  
24 intervention is essential to enhance the external validity, applicability and implementation of  
25  
26 results of systematic review,<sup>5</sup> barriers to the optimal quality of reporting for treatment  
27  
28 intervention should be explored and tackled in future studies.  
29  
30  
31

32  
33  
34 Removal of STRICTA-specific information in the reporting due to the journal's space  
35  
36 constraints or suggestions of editors as well as peer-reviewers was addressed by some trial  
37  
38 authors.<sup>15</sup> This may be the case for the systematic review published in non-Cochrane medical  
39  
40 journals which have limited word counts.<sup>15</sup> In our research, the possibility of potential  
41  
42 influence of space constraints on suboptimal reporting seems unlikely because Cochrane  
43  
44 review allows review authors to describe the main characteristics of each included study  
45  
46 without any space constraints. However, lack of comparison of the reporting quality of  
47  
48 acupuncture intervention in Cochrane reviews with those in non-Cochrane reviews published  
49  
50 in journals with space-constraints do not provide evidence to support this argument. Future  
51  
52 research incorporating both Cochrane and non-Cochrane reviews may reveal whether there is  
53  
54 any systematic differences of reporting quality in terms of the details of treatment  
55  
56  
57  
58  
59  
60



1  
2  
3 intervention between Cochrane and non-Cochrane reviews, thus space-constraints could be  
4  
5 an influencing factor to the reporting quality of intervention-related information or not.  
6  
7

8  
9  
10 Evaluation of internal validity has been put on great emphasis in the Cochrane systematic  
11  
12 reviews.<sup>9,16</sup> However, evaluating applicability of review results may also be of similar  
13  
14 importance, since uptake and reproduction of review results may be able to change the  
15  
16 routine clinical practice toward evidence-based practice.<sup>5</sup> Lack of consideration of external  
17  
18 validity is a major criticism of systematic reviews and RCTs, and is a potential threat of poor  
19  
20 uptake of evidence into routine clinical practice.<sup>17-20</sup> Intervention details and treatment  
21  
22 contexts which STRICTA aims to address are suggested as the determinants of external  
23  
24 validity in trial, systematic review and guideline publications,<sup>12, 23</sup> although little is known  
25  
26 whether detailed description of acupuncture interventions in systematic reviews can affect  
27  
28 uptake of evidence in practice. Whether selective reporting of acupuncture interventions  
29  
30 observed in our study would influence the uptake of evidence may deserve further research.  
31  
32

### 33 34 35 36 **Strengths and weakness**

37  
38 Our study is the first investigation of the completeness of reporting quality in terms of  
39  
40 treatment process and components, by comparing reports in primary component studies with  
41  
42 those in Cochrane reviews. In particular, STRICTA is the best representative recommendation  
43  
44 agreed by international acupuncture experts, constituting core components of acupuncture  
45  
46 treatment that may be inter-related.<sup>3</sup> However, STRICTA had not been developed to measure  
47  
48 the quality of reporting acupuncture interventions, although we summed the scores of each  
49  
50 items to score the overall quality of reporting acupuncture interventions. Since this method is  
51  
52 not based on the original purpose of STRICTA and there is no weighting criteria for each  
53  
54 items, interpretations of our results should be cautious.<sup>8</sup> The scores should not be understood  
55  
56  
57  
58  
59  
60

1  
2  
3 as the exact quantitative estimates across the studies, but as possible indicators of  
4  
5 incompleteness of reporting details of acupuncture.  
6  
7

8  
9  
10 Results of rating might be prone to subjective assessment, although extensive training of  
11 authors using CONSORT elaboration document<sup>3</sup> were preceded. Two assessors were  
12  
13 unblinded to the study characteristics, such as publication dates or allocation of acupuncture  
14  
15 as a primary or control intervention. Since both assessors are acupuncture researchers as well  
16  
17 as practitioners thus may be familiar with included acupuncture studies, we did not attempt to  
18  
19 blind the assessors. Prady et al. found that unblinded assessor gave higher scores to some of  
20  
21 acupuncture studies in terms of items of STRICTA, although this tendency was not consistent  
22  
23 in the rest of studies to be assessed.<sup>8</sup> Nevertheless, unblinded assessors with prior knowledge  
24  
25 of study characteristics in our review may have introduced bias.  
26  
27  
28  
29  
30  
31

32 The first STRCITA was published in 2001, and as a revised version in 2010. We adopted the  
33  
34 revised version of STRICTA for studies which had been published both before and after it.  
35  
36 Thus, component studies published before the publication of revised STRICTA may not  
37  
38 address the some revised items assessed in this review. This may have yielded a systematic  
39  
40 bias when assessing the component studies by disadvantaging articles following a previous  
41  
42 version of the guideline.<sup>8</sup> Nevertheless, the utilization of the latest version of STRICTA was  
43  
44 justified in our study with three reasons: First, the CONSORT initiatives recommended the  
45  
46 use of most recently released version of reporting standards when reporting and analyzing  
47  
48 RCTs.<sup>21</sup> Second, the ultimate aim of using STRCITA in this study was not to score  
49  
50 component studies per each item, but to reflect whether and how Cochrane reviews report or  
51  
52 omit essential component of acupuncture treatments which were deemed the best  
53  
54 representation of consensus across international acupuncture experts. Third, we identified that  
55  
56  
57  
58  
59  
60

1  
2  
3 selected components for this review in the original STRICTA and in the revised one is almost  
4  
5 consistent enough to justify the use of the latest version of STRICTA. In this sense, the latest  
6  
7 version of STRICTA was preferred.  
8  
9

10  
11 We did not contact authors of the primary component studies to gain additional information  
12  
13 with regard to the under-reported items of STRICTA. This was because our primary interest  
14  
15 is to identify selective reporting / omissions of acupuncture-related information during the  
16  
17 review process in the Cochrane reviews. Given the authors of primary component studies are  
18  
19 often contacted to gain additional information when conducting systematic review, however,  
20  
21 our study might not reflect common information-seeking procedure during review process.  
22  
23 Author contact would have brought to what extent Cochrane reviews could have  
24  
25 comprehensively described the treatment-related information of acupuncture based on the  
26  
27 standard author query process recommended in the Cochrane handbook.<sup>22</sup> Future follow-up  
28  
29 study may address such limitation.  
30  
31  
32  
33  
34  
35

### 36 **Implication for future research**

37  
38 Factors associated with how and why review authors selectively summarize the treatment  
39  
40 intervention during the review process should be investigated to identify the potential barrier  
41  
42 of optimal quality of reporting in Cochrane reviews of acupuncture. Recent empirical  
43  
44 evidence supports that the utilization of reporting guideline (i.e., CONSORT, STROBE,  
45  
46 TREND and STARD) with regard to general methodological issues during peer review  
47  
48 processes improves the quality of publication in biomedical journals.<sup>23</sup> Whether and how  
49  
50 reporting guidelines for the description of treatment intervention such as STRICTA can be  
51  
52 efficiently utilized during editorial and peer-review process and provided as author-support  
53  
54 resources in CRG websites should be explored to improve the reporting quality of treatment  
55  
56  
57  
58  
59  
60

1  
2  
3 intervention. Whether and how reporting items of STRICTA explaining theoretical  
4  
5 background, mechanical aspects and contextual factors of acupuncture could contribute to the  
6  
7 investigation of clinical heterogeneity of acupuncture treatments and their potential impacts  
8  
9 on effect estimates should also be explored. Whether loss of treatment-related information  
10  
11 actually leads to an altered replicability of reported interventions in Cochrane reviews was  
12  
13 not investigated in this study, and should also be investigated in future research.  
14  
15  
16  
17

### 18 **Conclusions**

19  
20 The reporting quality of treatment details in Cochrane reviews of acupuncture was  
21  
22 insufficient with regard to STRICTA recommendation, even though information was readily  
23  
24 reported in primary component studies. STRICTA was rarely utilized by CRGs and review  
25  
26 authors. Use of STRICTA guideline for the reporting treatment details in Cochrane reviews  
27  
28 and peer-review process should be considered to improve the replicability and utilization of  
29  
30 review results in future research and clinical practice.  
31  
32  
33  
34  
35  
36  
37  
38  
39  
40  
41  
42  
43  
44  
45  
46  
47  
48  
49  
50  
51  
52  
53  
54  
55  
56  
57  
58  
59  
60

## References

1. Schunemman HJ, Oxman AD, Higgins JPT, Vist GE, Glasziou P, Guyatt GH. Chapter 11: Presenting results and 'Summary of findings' table. In: Higgins JPT, Green S (editors). *Cochrane Handbook for Systematic Reviews of Interventions*. Chichester (UK): John Wiley & Sons, 2008.
2. Shepperd S, Lewin S, Straus S, *et al*. Can we systematically review studies that evaluate complex interventions? *PLoS Med* 2009;6: e1000086.doi: 10.1371/journal.pmed.1000086.
3. MacPherson H, Altman DG, Hammerschlag R, *et al*. Revised STAndards for Reporting Interventions in Clinical Trials of Acupuncture (STRICTA): extending the CONSORT statement. *PLoS Med*. 2010;7: e1000261.doi: 10.1371/journal.pmed.1000261.
4. Boutron I, Moher D, Altman DG, *et al*. Extending the CONSORT statement to randomized trials of nonpharmacologic treatment: explanation and elaboration. *Ann Intern Med* 2008;148:295-309.
5. Glasziou P, Meats E, Heneghan C, Shepperd S. What is missing from descriptions of treatment in trials and reviews? *BMJ* 2008;336:1472-4.
6. Schunemman HJ, Oxman AD, Vist GE, Higgins JPT, Deeks JJ, Glasziou P, Guyatt GH. Chapter 12: Interpreting results and drawing conclusions. In: Higgins JPT, Green S (editors). *Cochrane Handbook for Systematic Reviews of Interventions*. Chichester (UK): John Wiley & Sons, 2008.
7. Liberati A, Altman DG, Tetzlaff J, *et al*. The PRISMA statement for reporting systematic reviews and meta-analyses of studies that evaluate healthcare interventions: explanation and elaboration. *BMJ* 2009;339: doi: 10.1136/bmj.b2700.doi: 10.1136/bmj.b2700.
8. Prady SL, Richmond SJ, Morton VM, Macpherson H. A systematic evaluation of the impact of STRICTA and CONSORT recommendations on quality of reporting for acupuncture trials. *PLoS One* 2008;3: e1577.doi: 10.1371/journal.pone.0001577.
9. Ahmad N, Boutron I, Dechartres A,*et al*. Applicability and generalisability of the results of systematic reviews to public health practice and policy: a systematic review. *Trials* 2010;11:20.doi: 10.1186/1745-6215-11-20.
10. Hoffman T, Glasziou P, Erueti C. Poor description of non-drug interventions: a remediable barrier to usage of evidence in practice? (P132). Abstracts of the 20th Cochrane Colloquium, 30 September

- 1  
2  
3 - 3 October 2012, Auckland, New Zealand Cochrane Database of Systematic Reviews, Supplement  
4  
5 2012: Art No. CD201200. doi:101002/14651858CD201200. 2012.  
6  
7 11. Kaptchuk TJ, Kelley JM, Conboy LA, *et al.* Components of placebo effect: randomised controlled  
8  
9 trial in patients with irritable bowel syndrome. *BMJ* 2008;336:999-1003.  
10  
11 12. Wells M, Williams B, Treweek S, *et al.* Intervention description is not enough: evidence from an  
12  
13 in-depth multiple case study on the untold role and impact of context in randomised controlled trials  
14  
15 of seven complex interventions. *Trials* 2012;13:95. doi: 10.1186/1745-6215-13-95.  
16  
17 13. Paterson C, Dieppe P. Characteristic and incidental (placebo) effects in complex interventions such  
18  
19 as acupuncture. *BMJ* 2005;330:1202-5.  
20  
21 14. Macpherson H, Tilbrook H, Bland MJ, *et al.* Acupuncture for irritable bowel syndrome: primary  
22  
23 care based pragmatic randomised controlled trial. *BMC Gastroenterol*  
24  
25 2012;12:150. doi:10.1186/1471-230X-12-150.  
26  
27 15. Prady SL, Macpherson H. Assessing the utility of the standards for reporting trials of acupuncture  
28  
29 (STRICTA): a survey of authors. *J Altern Complement Med* 2007;13(9):939-43.  
30  
31 16. Higgins JPT, Altman DG (editors). Chapter 8: Assessing risk of bias in included studies. In:  
32  
33 Higgins JPT, Green S (editors). *Cochrane Handbook for Systematic Reviews of Interventions*.  
34  
35 Chichester (UK): John Wiley & Sons, 2008.  
36  
37 17. Eldridge S, Ashby D, Bennett C, *et al.* Internal and external validity of cluster randomised trials:  
38  
39 systematic review of recent trials. *BMJ* 2008;336:876-80.  
40  
41 18. Ethgen M, Boutron L, Steg PG, *et al.* Quality of reporting internal and external validity data from  
42  
43 randomized controlled trials evaluating stents for percutaneous coronary intervention. *BMC Med*  
44  
45 *Res Methodol* 2009;9:24. doi: 10.1186/1471-2288-9-24.  
46  
47 19. Rothwell PM. Assessment of the external validity of randomised controlled trials. In: Rothwell PM,  
48  
49 editor. *Treating individuals: From randomised trials to personalised medicine*. Spain: Elsevier; 2007.  
50  
51 p. 61-82.  
52  
53 20. Purepong N, Jitvimonrat A, Sitthipornvorakul E, *et al.* External validity in randomised controlled  
54  
55 trials of acupuncture for osteoarthritis knee pain. *Acupunct Med* 2012;30:187-94.  
56  
57  
58  
59  
60

- 1  
2  
3 21.<http://www.consort-statement.org/>. [Assessed 9th Sep, 2013].  
4  
5 22.Higgins JPT, DeeksJJ (editors). Chapter7: Selecting studies and collecting data. In: Higgins JPT,  
6  
7 Green S (editors). Cochrane Handbook for Systematic Reviews of Interventions. Chichester (UK):  
8  
9 John Wiley & Sons, 2008.  
10  
11 23.Cobo E, Cortés J, Ribera JM, *et al*. Effect of using reporting guidelines during peer review on  
12  
13 quality of final manuscripts submitted to a biomedical journal: masked randomised trial.  
14  
15 *BMJ*2011;343:d6783.doi: 10.1136/bmj.d6783.  
16  
17  
18  
19  
20  
21  
22  
23  
24  
25  
26  
27  
28  
29  
30  
31  
32  
33  
34  
35  
36  
37  
38  
39  
40  
41  
42  
43  
44  
45  
46  
47  
48  
49  
50  
51  
52  
53  
54  
55  
56  
57  
58  
59  
60

Table 1. General characteristics of Cochrane reviews related to acupuncture

|                                                                    | Included Cochrane reviews<br>N=25 |
|--------------------------------------------------------------------|-----------------------------------|
| <b>Number of Cochrane reviews, N(%)</b>                            |                                   |
| Acupuncture as primary                                             | 17                                |
| Acupuncture as secondary                                           | 8                                 |
| <b>Number of component study</b>                                   |                                   |
| Total                                                              | 409                               |
| Mean                                                               | 16.36 (11.77)                     |
| Median (Q1-Q3)                                                     | 13 (3 – 47)                       |
| <b>Number of component study published after 2005</b>              |                                   |
| Total                                                              | 92                                |
| Mean                                                               | 3.7 (3.85)                        |
| Median (Q1-Q3)                                                     | 2 (1 – 5)                         |
| <b>Publication language of component studies after 2005, N (%)</b> |                                   |
| Total                                                              | 92                                |
| English                                                            | 58 (63%)                          |
| Languages other than English                                       | 34 (37%)                          |
| <b>Number of component studies published in</b>                    |                                   |
| Acupuncture-related journal                                        | 47                                |
| Western medicine journal                                           | 43                                |
| <b>Publication year</b>                                            |                                   |
| Cochrane review (Q1-Q3)                                            | 2010 (2008-2011)                  |
| Component studies (Q1-Q3)                                          | 2007 (2006-2008)                  |
| <b>Types of control*, N (%)</b>                                    |                                   |
| Sham acupuncture                                                   | 34 (37%)                          |
| Active acupuncture                                                 | 14 (15%)                          |
| Non-acupuncture                                                    | 68 (74%)                          |
| <b>Clinical heterogeneity related to acupuncture</b>               |                                   |
| Investigated                                                       | 12 (48%)                          |
| in subgroup analysis                                               | 5 (20%)                           |
| in sensitivity analysis                                            | 6 (24%)                           |
| in other analysis                                                  | 8 (32%)                           |
| Not investigated                                                   | 13(52%)                           |

\* Sum of the number of each control group may exceed the total number of included trials, since there are trials that have more than two control groups.

Q1-Q3: interquartile range 1 to 3



Table 2. Response of review authors for the reporting of acupuncture details in the Cochrane review

| N=25      | Q1       | Q2       | Q3       | Q4       |
|-----------|----------|----------|----------|----------|
| Yes       | 11 (44%) | 4 (16%)  | 0 (0%)   | 0 (0%)   |
| No        | 2 (8%)   | 5 (20%)  | 10 (40%) | 8 (32%)  |
| No answer | 12 (48%) | 16 (64%) | 15(60%)  | 17 (68%) |

Q1. Are you aware of any guideline or recommendation for reporting details of acupuncture treatment in journal publication?

Q2. Have you ever referred or used any reporting guidelines or recommendations when you reported the details of acupuncture treatments in your Cochrane review?

Q3. Have you ever received any guideline or recommendation for reporting details of acupuncture treatment from the Cochrane review group, when writing or updating your review?

Q4. Have you ever received any constraints or restrictions when reporting the details of acupuncture treatments in your Cochrane review?

Table 3. The number of component studies in Cochrane reviews and of original RCTs with reporting of selected STRICTA items

| Items                                   | Component studies<br>in Cochrane reviews |        | Original RCTs |        | *Difference (95% CI) |
|-----------------------------------------|------------------------------------------|--------|---------------|--------|----------------------|
|                                         | n/N                                      | (%)    | n/N           | %      |                      |
| <b>A. Acupuncture rationale</b>         |                                          |        |               |        |                      |
| 1. Style of acupuncture treatment       | 59/92                                    | (64.1) | 66/92         | (71.7) | 7.6 [1.1, 14.1]      |
| 2. Reasoning of treatment               | 6/92                                     | (6.5)  | 42/92         | (45.6) | 39.1 [28.1, 50.2]    |
| 3. Extent to which treatment was varied | 76/92                                    | (82.6) | 87/92         | (94.6) | 12.0 [4.2, 19.5]     |
| Total section A.                        |                                          |        |               |        |                      |
| <b>B. Needling details</b>              |                                          |        |               |        |                      |
| 1. Number of needles                    | 76/92                                    | (82.6) | 84/92         | (91.3) | 8.7 [1.9, 15.5]      |
| 2. Names of points                      | 74/92                                    | (80.4) | 84/92         | (91.3) | 10.9 [2.7, 19.0]     |
| 4. Depths of insertion                  | 36/92                                    | (39.1) | 41/92         | (44.6) | 5.4 [-7.1, 17.9]     |
| 5. Response to needle                   | 53/92                                    | (57.6) | 63/92         | (68.5) | 10.9 [0.0, 21.7]     |
| 6. Needle stimulation                   | 42/92                                    | (45.7) | 64/92         | (69.6) | 23.9 [13.6, 34.2]    |
| 8. Retention time                       | 69/92                                    | (75.0) | 81/92         | (88.0) | 13.0 [4.4, 21.6]     |
| 9. Needle type                          | 18/92                                    | (19.6) | 60/92         | (65.2) | 45.7 [34.4, 56.9]    |
| Total section B.                        |                                          |        |               |        |                      |
| <b>C. Treatment regimen</b>             |                                          |        |               |        |                      |
| 1. Number of sessions                   | 85/92                                    | (92.4) | 90/92         | (97.8) | 5.4 [-0.3, 11.2]     |
| 2. Frequency/Duration                   | 85/92                                    | (92.4) | 88/92         | (95.7) | 3.3 [-2.5, 9.1]      |
| Total Section C.                        |                                          |        |               |        |                      |
| <b>D. Treatment context</b>             |                                          |        |               |        |                      |
| 1. Details of other treatments          | 15/92                                    | (16.3) | 31/92         | (33.7) | 17.4 [8.6, 26.2]     |
| 2. Setting and context                  | 2/92                                     | (2.2)  | 19/92         | (20.7) | 18.5 [9.5, 27.5]     |
| Total Section D.                        |                                          |        |               |        |                      |
| <b>E. Practitioner background</b>       |                                          |        |               |        |                      |
| 1. Description of acupuncturists        | 56/92                                    | (60.9) | 51/92         | (55.4) | -5.4 [-15.2, -4.4]   |

Abbreviation; RCTs, randomized controlled trials

\*: Higher number means favorable results to RCTs.

1  
2  
3  
4 Figure 1. Flowchart of Cochrane reviews and component study selections  
5 CDSR; Cochrane database of systematic reviews  
6  
7

8  
9 Figure 2. The number of reported items of STRICTA in Cochrane reviews of acupuncture and  
10 related RCTs  
11

12 RCT; Randomized controlled trial  
13  
14  
15  
16  
17  
18  
19  
20  
21  
22  
23  
24  
25  
26  
27  
28  
29  
30  
31  
32  
33  
34  
35  
36  
37  
38  
39  
40  
41  
42  
43  
44  
45  
46  
47  
48  
49  
50  
51  
52  
53  
54  
55  
56  
57  
58  
59  
60

For peer review only

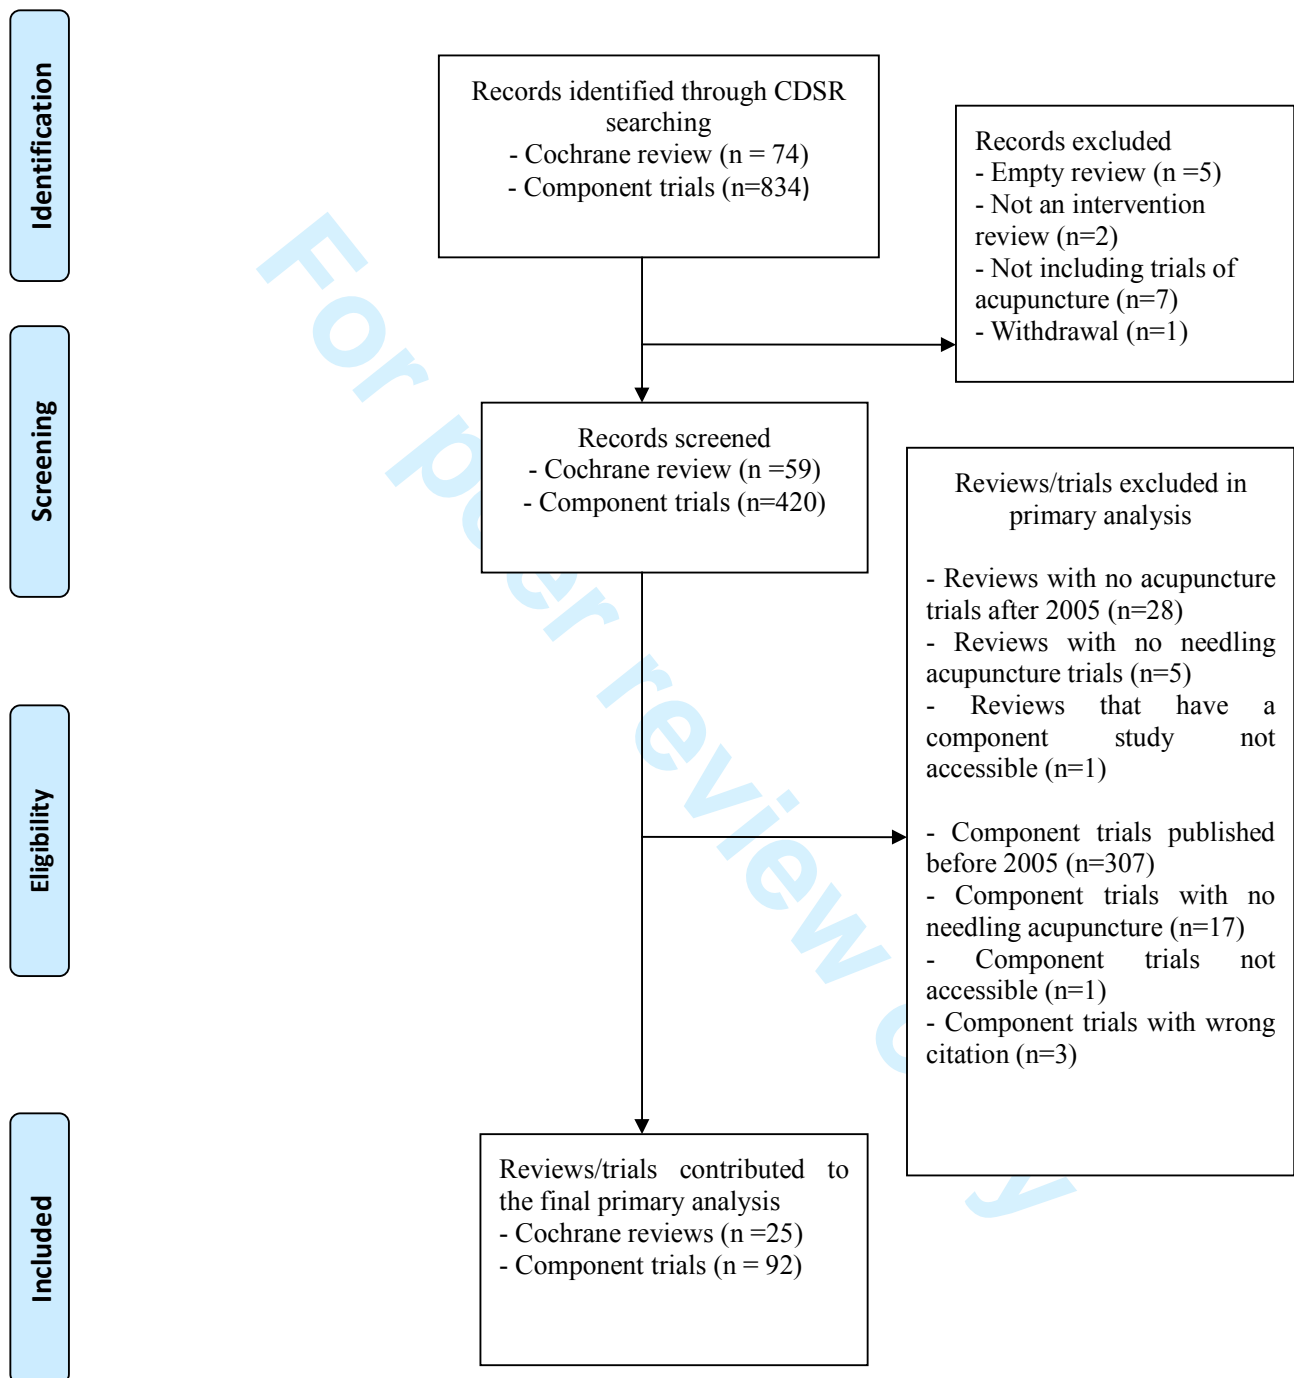

1  
2  
3  
4  
5  
6  
7  
8  
9  
10  
11  
12  
13  
14  
15  
16  
17  
18  
19  
20  
21  
22  
23  
24  
25  
26  
27  
28  
29  
30  
31  
32  
33  
34  
35  
36  
37  
38  
39  
40  
41  
42  
43  
44  
45  
46  
47  
48  
49  
50  
51  
52  
53  
54  
55  
56  
57  
58  
59  
60

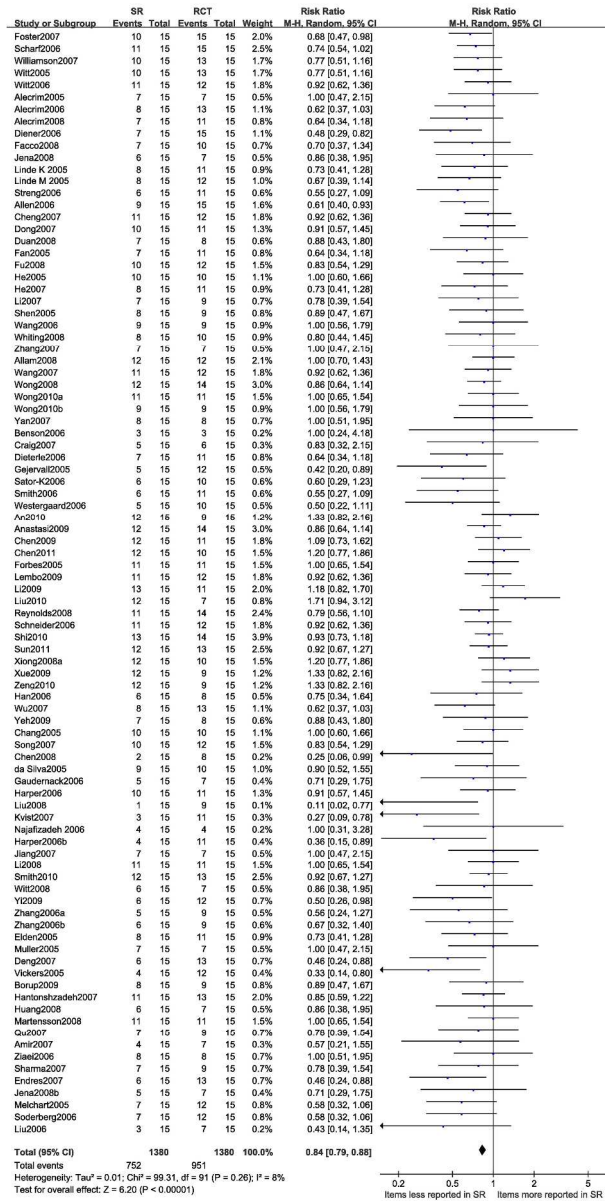

The number of reported items of STRICTA in Cochrane reviews of acupuncture and related RCTs  
264x522mm (300 x 300 DPI)

1  
2  
3  
4 **Appendix 1.** Cochrane reviews of acupuncture and relevant primary randomized controlled  
5 trials included in the analysis  
6  
7  
8

9 **Included Cochrane reviews of acupuncture**

10 1. Cheong YC, HungYuNg E, Ledger WL. Acupuncture and assisted conception. Cochrane  
11 Database Syst Rev. 2008; 4: CD006920.  
12

13 2. White AR, Rampes H, Liu JP, Stead LF, Campbell J. Acupuncture and related interventions  
14 for smoking cessation. Cochrane Database Syst Rev. 2011; 1: CD000009.  
15

16 3. Wong V, Cheuk DK, Lee S, Chu V. Acupuncture for acute management and rehabilitation  
17 of traumatic brain injury. Cochrane Database Syst Rev. 2011; 5: CD007700.  
18

19 4. Cheuk DK, Wong V, Chen WX. Acupuncture for autism spectrum disorders (ASD).  
20 Cochrane Database Syst Rev. 2011; 9: CD007849.  
21

22 5. Paley CA, Johnson MI, Tashani OA, Bagnall AM. Acupuncture for cancer pain in adults.  
23 Cochrane Database Syst Rev. 2011; 1: CD007753.  
24

25 6. McCarney RW, Brinkhaus B, Lasserson TJ, Linde K. Acupuncture for chronic asthma.  
26 Cochrane Database Syst Rev. 2004; 1: CD000008.  
27

28 7. Smith CA, Hay PP, Macpherson H. Acupuncture for depression. Cochrane Database Syst  
29 Rev. 2010; 1: CD004046.  
30

31 8. Smith CA, Zhu X, He L, Song J. Acupuncture for dysmenorrhoea. Cochrane Database Syst  
32 Rev. 2011; 1: CD007854.  
33

34 9. Cheuk DK, Wong V. Acupuncture for epilepsy. Cochrane Database Syst Rev. 2008; 4:  
35 CD005062.  
36

37 10. Smith CA, Crowther CA. Acupuncture for induction of labour. Cochrane Database Syst  
38 Rev. 2004; 1: CD002962.  
39

40 11. Cheuk DK, Yeung WF, Chung KF, Wong V. Acupuncture for insomnia. Cochrane  
41 Database Syst Rev. 2007; 3: CD005472.  
42

43 12. Linde K, Allais G, Brinkhaus B, Manheimer E, Vickers A, White AR. Acupuncture for  
44 migraine prophylaxis. Cochrane Database Syst Rev. 2009; 1: CD001218.  
45

46 13. Manheimer E, Cheng K, Linde K, Lao L, Yoo J, Wieland S, et al. Acupuncture for  
47 peripheral joint osteoarthritis. Cochrane Database Syst Rev. 2010; 1: CD001977.  
48

49 14. Linde K, Allais G, Brinkhaus B, Manheimer E, Vickers A, White AR. Acupuncture for  
50 tension-type headache. Cochrane Database Syst Rev. 2009; 1: CD007587.  
51

52 15. Manheimer E, Cheng K, Wieland LS, Min LS, Shen X, Berman BM, et al. Acupuncture  
53  
54  
55  
56  
57  
58  
59  
60

- 1  
2  
3  
4 for treatment of irritable bowel syndrome. *Cochrane Database Syst Rev.* 2012; **5**: CD005111.
- 5  
6 16. Smith CA, Collins CT, Crowther CA, Levett KM. Acupuncture or acupressure for pain  
7 management in labour. *Cochrane Database Syst Rev.* 2011; **7**: CD009232.
- 8  
9 17. Waseem Z, Boulias C, Gordon A, Ismail F, Sheean G, Furlan AD. Botulinum toxin  
10 injections for low-back pain and sciatica. *Cochrane Database Syst Rev.* 2011; **1**: CD008257.
- 11  
12 18. Dowswell T, Kelly AJ, Livio S, Norman JE, Alfirevic Z. Different methods for the  
13 induction of labour in outpatient settings. *Cochrane Database Syst Rev.* 2010; **8**: CD007701.
- 14  
15 19. Pennick VE, Young G. Interventions for preventing and treating pelvic and back pain in  
16 pregnancy. *Cochrane Database Syst Rev.* 2007; **2**: CD001139.
- 17  
18 20. Gross A, Miller J, D'Sylva J, Burnie SJ, Goldsmith CH, Graham N, et al. Manipulation or  
19 Mobilisation for Neck Pain. *Cochrane Database Syst Rev.* 2010; **1**: CD004249.
- 20  
21 21. Rada G, Capurro D, Pantoja T, Corbalán J, Moreno G, Letelier LM, et al. Non-hormonal  
22 interventions for hot flushes in women with a history of breast cancer. *Cochrane Database*  
23 *Syst Rev.* 2010; **9**: CD004923.
- 24  
25 22. Bausewein C, Booth S, Gysels M, Higginson I. Non-pharmacological interventions for  
26 breathlessness in advanced stages of malignant and non-malignant diseases. *Cochrane*  
27 *Database Syst Rev.* 2008; **2**: CD005623.
- 28  
29 23. Lee A, Fan LT. Stimulation of the wrist acupuncture point P6 for preventing postoperative  
30 nausea and vomiting. *Cochrane Database Syst Rev.* 2009; **2**: CD003281.
- 31  
32 24. Thomas LH, Cross S, Barrett J, French B, Leathley M, Sutton CJ, et al. Treatment of  
33 urinary incontinence after stroke in adults. *Cochrane Database Syst Rev.* 2008; **1**: CD004462.
- 34  
35 25. Mangesi L, Dowswell T. Treatments for breast engorgement during lactation. *Cochrane*  
36 *Database Syst Rev.* 2010; **9**: CD006946.
- 37  
38  
39  
40  
41  
42  
43  
44  
45  
46  
47  
48  
49  
50  
51  
52  
53  
54  
55  
56  
57  
58  
59  
60

**Primary randomized controlled trials in included Cochrane reviews of acupuncture\***

1. Benson MR, Elkind-Hirsch KE, Theall A, Fong K, Hogan RB, Scott RT. Impact of acupuncture before and after embryo transfer on the outcome of in vitro fertilization cycles: A prospective single blind randomized study. *Fertil Steril* 2006;86(Suppl(3)):135.
2. Craig LB, Criniti AR, Hansen KR, Marshall LA, Soules MR. Acupuncture lowers pregnancy rates when performed before and after embryo transfer. *Fertil Steril* 2007;88(Suppl(1)):40.
3. Gejervall A, Stener-Victorin E, Moller A, Janson PO, Werner C, Bergh C. Electro-acupuncture versus conventional analgesia: a comparison of pain levels during oocyte aspiration and patients' experiences of well-being after surgery. *Hum Reprod* 2005;20(3):728-35.
4. Sator-Katzenschlager SM, Wölfler MM, Kozek-Langenecker SA, Sator K, Sator PG, Li B, et al. Auricular electro-acupuncture as an additional perioperative analgesic method during oocyte aspiration in IVF treatment. *Hum Reprod* 2006;21(8):2114-20.
5. Smith C, Coyle M, Norman RJ. Influence of acupuncture stimulation on pregnancy rates for women undergoing embryo transfer. *Fertil Steril* 2006;85(5):1352-58.
6. Westergaard LG, Mao Q, Kroglund M, Sandrini S, Lenz S, Grinsted J. Acupuncture on the day of embryo transfer significantly improves the reproductive outcome in infertile women: a prospective, randomized trial. *Fertil Steril* 2006;85(5):1341-46.
7. Dieterle S, Ying G, Hatzmann W, Neuer A. Effect of acupuncture on the outcome of in vitro fertilisation and intracytoplasmic sperm injection: a randomised, prospective, controlled clinical study. *Fertil Steril* 2006;85(5):1347-51.
8. Han Y. Combining of acupuncture and auricular points applying for treatment of 42 cases of tobacco withdrawal syndrome. *Journal of Clinical Acupuncture and Moxibustion* 2006;22(11):16.
9. Wu TP, Chen FP, Liu JY, Lin MH, Hwang SJ. A randomized controlled clinical trial of auricular acupuncture in smoking cessation. *J Chin Med Assoc* 2007;70(8):331-38.
10. Yeh ML, Chang CY, Chu NF, Chen HH. A six-week acupoint stimulation intervention for quitting smoking. *Am J Chin Med* 2009;37(5):829-36.
11. Chang ZJ, Liu P, Gan L. Rehabilitation and acupuncture treatment for patients with traumatic brain injury. *Chinese Journal of Medical Device* 2005;18(5):38-39.
12. Song YJ, Zhang L, Zhou YQ. Observations on the efficacy of electroacupuncture-assisted treatment for resuscitating coma patients with serious brain trauma. *Shanghai Journal of*



1  
2  
3  
4 Acupuncture and Moxibustion 2007;26(4):11-12.

5  
6 13. Allam H, ElDine NG, Helmy G. Scalp acupuncture effect on language development in  
7 children with autism: a pilot study. *J Altern Complement Med* 2008;14(2):109-14.

8  
9 14. Wang CN, Liu Y, Wei XH, Li LX. Effects of electroacupuncture combined with behavior  
10 therapy on intelligence and behavior of children of autism. *Zhongguo Zhen Jiu*  
11 2007;27(9):660-62. [Article in Chinese].

12  
13 15. Wong CL. Acupuncture and autism spectrum disorders - an assessor-blinded randomized  
14 controlled trial (M Phil). University of Hong Kong 2008:1-192.

15  
16 16. Wong VC, Chen WX. Randomized controlled trial of electro-acupuncture for autism  
17 spectrum disorder. *Altern Med Rev* 2010;15(2):136-46.

18  
19 17. Wong VC, Sun JG. Randomized controlled trial of acupuncture versus sham acupuncture  
20 in autism spectrum disorder. *J Altern Complement Med* 2010;16(5):545-53.

21  
22 18. Yan YF, Wei YY, Chen YH, Chen MM. Effect of acupuncture on rehabilitation training of  
23 child's autism. *Zhongguo Zhen Jiu* 2007;27(7):503-05. [Article in Chinese].

24  
25 19. Chen ZJ, Guo YP, Wu ZC. Observation on the therapeutic effect of acupuncture at pain  
26 points on cancer pain. *Zhongguo Zhen Jiu* 2008;28(4):251-53.

27  
28 20. Najafizadeh K, Vosughian M, Rasaian N, Sohrabpour H, Derakhshan\_Deilami M,  
29 Ghadiani M, et al. A randomized double blind placebo controlled trial on the short and long  
30 term effects of electro acupuncture on moderate to severe asthma. *European Respiratory*  
31 *Journal* 2006;28(Suppl 50):502s.

32  
33 21. Allen JJ, Schnyer RN, Chambers AS, Hitt SK, Moreno FA, Manber R. Acupuncture for  
34 depression: a randomized controlled trial. *J Clin Psychiatry* 2006;67(11):1665-73.

35  
36 22. Cheng Y, Tang QS. Abdominal acupuncture in treating liver-qi stagnation and spleen  
37 deficiency in the elderly with post-stroke depression: A randomized and controlled  
38 observation. *Chinese Journal of Clinical Rehabilitation Tissue Engineering Research*  
39 2007;11(39):7791-94.

40  
41 23. Dong JP, Sun WY, Wang S, Wu ZQ, Liu F. Clinical observation on head point-through-  
42 point electroacupuncture for treatment of poststroke depression. *Zhongguo Zhen Jiu*  
43 2007;27(4):241-44. [Article in Chinese].

44  
45 24. Duan M, Tu Y, Chen LP. Assessment of effectiveness of electroacupuncture and  
46 fluoxetine for treatment of depression with physical symptoms. *Chinese Acupuncture and*  
47 *Moxibustion* 2008;28(3):167-70. [Article in Chinese].

48  
49 25. Fan L, Fu WB, Meng CR, Zhu XP, Mi JP, Li WX, et al. Effect of acupuncture at routine  
50  
51  
52  
53  
54  
55  
56  
57  
58  
59  
60

- 1  
2  
3  
4 acupoint and no-acupoint on depressive neurosis evaluated by Hamilton depression scale.  
5 Chinese Journal of Clinical Rehabilitation 2005;9(28):14-16. [Article in Chinese].  
6  
7 26. Fu WB, Fan L, Zhu XP, He Q, Wang L, Zhuang LX, et al. Acupuncture for treatment of  
8 depressive neurosis: a multi-center randomized controlled study. *Zhongguo Zhen Jiu*  
9 2008;28(1):3-6.  
10  
11 27. He J, Shen PF. Clinical study on the therapeutic effect of acupuncture in the treatment of  
12 post-stroke depression. *Acupuncture Research* 2007;32(1):58-61.  
13  
14 28. He XJ, Tan JL, Wang BG, Lai YY. Effects of acupuncture using XingnaoKaiqiao  
15 (consciousness restoring resuscitation) needling method on acupuncture with post stroke  
16 depression. *Chinese Journal of Rehabilitation, Theory and Practice* 2005;11(6):467-68.  
17  
18 29. Li SJ, Liu T. Clinical observation on treatment of melancholia by acupuncture following  
19 principle of relieving depression and regulating mentality. *Chinese Journal of Integrated*  
20 *Traditional and Western Medicine* 2007;27(2):155-57.  
21  
22 30. Shen PF, Kong L, Shi XM. Study on clinical therapeutic effect of activating brain and  
23 regaining consciousness needling method on post-stroke depressing and the mechanism.  
24 *Zhongguo Zhen Jiu* 2005;25(1):11-13.  
25  
26 31. Wang J, Jiang JF, Wang LL. Clinical observation on governor vessel Daoqi method for  
27 treatment of dyssomnia in the patient of depression. *Zhongguo Zhen Jiu* 2006;26(5):328-30.  
28  
29 32. Whiting M, Leavey G, Scammell A, Au S, King M. Using acupuncture to treat depression:  
30 a feasibility study. *Complement Ther Med* 2008;16(2):87-91.  
31  
32 33. Zhang GJ, Shi ZY, Liu S, Gong SH, Liu JQ, Liu JS. Clinical observation on treatment of  
33 depression by electro-acupuncture combined with Paroxetine. *Chin J Integr Med*  
34 2007;13(3):228-30.  
35  
36 34. Jiang LY. Clinical experience for the treatment of 34 cases of primary dysmenorrhoea.  
37 *Journal of Emergency in Traditional Chinese Medicine* 2007;16(5):620-21.  
38  
39 35. Li CH, Wang YZ, Ge XX. Clinical observation of the use of acupuncture on 4 gate points  
40 for primary dysmenorrhoea. *Journal Chinese Acupuncture and Moxibustion* 2008;28(3):187-  
41 90.  
42  
43 36. Smith CA, Crowther CA, Petrucco O, Beilby J, Dent H. Acupuncture to treat primary  
44 dysmenorrhea in women: a randomised controlled trial. *Evid Based Complement Alternat*  
45 *Med* 2010;2011:612464.  
46  
47 37. Witt CM, Reinhold T, Brinkhaus B, Roll S, Jena S, Willich SN. Acupuncture in patients  
48 with dysmenorrhea: a randomized study on clinical effectiveness and cost-effectiveness in  
49  
50  
51  
52  
53  
54  
55  
56  
57  
58  
59  
60

- 1  
2  
3  
4 usual care. *Am J ObstetGynecol* 2008;198(2):166.e1-66.e8.
- 5  
6 38. Zhi LX. Randomized controlled study on superficial needling for treatment of primary  
7  
8 dysmenorrhea. *Zhongguo Zhen Jiu* 2007;27(1):18-21.
- 9  
10 39. Yi HL. Observation of electro-acupuncture treatment of vasoconstriction district for grand  
11  
12 mal seizures. Thesis (M. Phil.). Guangzhou University of Traditional Chinese Medicine  
13  
14 2009:1-36.
- 15  
16 40. Zhang J. Study of curative effect of generalized tonic-clonic seizure (GTCS) treated by  
17  
18 catgut implantation at acupoint. Thesis (M. Phil.). Guangzhou University of Traditional  
19  
20 Chinese Medicine 2006;1-41.
- 21  
22 41. Zhang J, Li Y, Zhuang L. Clinical observation on catgut implantation at acupoint for  
23  
24 treatment of generalised tonic clonic epilepsy. Report of 90 cases. *Journal of Clinical*  
25  
26 *Acupuncture and Moxibustion* 2006;22(6):8-10.
- 27  
28 42. Gaudernack LC, Forbord S, Hole E. Acupuncture administered after spontaneous rupture  
29  
30 of membranes at term significantly reduces the length of birth and use of oxytocin. A  
31  
32 randomized controlled trial. *ActaObstetGynecolScand* 2006;85(11):1348-53.
- 33  
34 43. Harper TC, Coeytaux RR, Chen W, Campbell K, Kaufman JS, Moise KJ, et al. A  
35  
36 randomized controlled trial of acupuncture for initiation of labor in nulliparous women. *J*  
37  
38 *Matern Fetal Neonatal Med* 2006;19(8):465-70.
- 39  
40 44. daSilva JB, Nakamura MU, Cordeiro JA, Kulay LJ. Acupuncture for insomnia in  
41  
42 pregnancy--a prospective, quasi-randomised, controlled study. *Acupunct Med* 2005;23(2):47-  
43  
44 51.
- 45  
46 45. Alecrim-Andrade J, Maciel-Júnior JA, Carnè X, Severino\_Vasconcelos GM, Correa-Filho  
47  
48 HR. Acupuncture in migraine prevention: a randomized sham controlled study with 6-months  
49  
50 posttreatment follow-up. *Clin J Pain* 2008;24(2):98-105.
- 51  
52 46. Alecrim-Andrade J, Maciel-Júnior JA, Cladellas XC, Correa-Filho HR, Machado HC.  
53  
54 Acupuncture in migraine prophylaxis: a randomized sham-controlled trial. *Cephalalgia*  
55  
56 2006;26(5):520-29.
- 57  
58 47. Alecrim-Andrade J, Maciel-Júnior JA, Cladellas XC, Correa-Filho HR, Machado HC,  
59  
60 Vasconcelos GMS. Efficacy of acupuncture in migraine attack prophylaxis: a randomized  
sham-controlled trial. *Cephalalgia* 2005;25(10):942.
48. Diener HC, Kronfeld K, Boewing G, Lungenhausen M, Maier C, Molsberger A, et al.  
Efficacy of acupuncture for the prophylaxis of migraine: a multicentre randomised controlled  
clinical trial. *Lancet Neurol* 2006;5(4):310-16.

- 1
- 2
- 3
- 4 49. Facco E, Liguori A, Petti F, Zanette G, Coluzzi F, De\_Nardin M, et al. Traditional
- 5 acupuncture in migraine: a controlled, randomized study. *Headache* 2008;48(3):398-407.
- 6
- 7 50. Jena S, Witt CM, Brinkhaus B, Wegscheider K, Willich SN. Acupuncture in patients with
- 8 headache. *Cephalalgia* 2008;28(9):969-79.
- 9
- 10 51. Linde K, Streng A, Hoppe A, Brinkhaus B, Witt CM, Hammes M, et al. Treatment in a
- 11 randomized multicenter trial of acupuncture for migraine (ART migraine). *Forsch*
- 12 *Komplementmed* 2006;13(2):101-08.
- 13
- 14 52. Linde K, Streng A, Jürgens S, Hoppe A, Brinkhaus B, Witt C, et al. Acupuncture for
- 15 patients with migraine: a randomized controlled trial. *JAMA* 2005;293(17):2118-25.
- 16
- 17 53. Linde M, Fjell A, Carlsson J, Dahlöf C. Role of the needling per se in acupuncture as
- 18 prophylaxis for menstrually related migraine: a randomized placebo-controlled study.
- 19 *Cephalalgia* 2005;25(1):41-47.
- 20
- 21 54. Melchart D, Linde K, Streng A, Reitmayr S, Hoppe A, Brinkhaus B, et al. Acupuncture
- 22 Randomized Trials (ART) in patients with migraine or tension-type headache--design and
- 23 protocols. *Forsch Komplementarmed Klass Naturheilkd* 2003;10(4):179-84.
- 24
- 25 55. Molsberger AF, Boewing G, Diener HC, Endres HG, Kraehmer N, Kronfeld K, et al.
- 26 Designing an acupuncture study: the nationwide, randomized, controlled, German
- 27 acupuncture trials on migraine and tension-type headache. *J Altern Complement Med*
- 28 2006;12(3):237-45.
- 29
- 30 56. Streng A, Linde K, Hoppe A, Pfaffenrath V, Hammes M, Wagenpfeil S, et al.
- 31 Effectiveness and tolerability of acupuncture compared with metoprolol in migraine
- 32 prophylaxis. *Headache* 2006;46(10):1492-502.
- 33
- 34 57. Jena S, Witt C, Brinkhaus B, Selim D, Willich SN. Effectiveness of acupuncture
- 35 treatment for headache - the Acupuncture in Routine Care Study (ARC-Headache). *Focus on*
- 36 *Alternative and Complementary Therapies* 2004;9:Suppl:17.
- 37
- 38 58. Foster NE, Thomas E, Barlas P, Hill JC, Young J, Mason E, et al. Acupuncture as an
- 39 adjunct to exercise based physiotherapy for osteoarthritis of the knee: randomised controlled
- 40 trial. *BMJ* 2007;335(7617):436.
- 41
- 42 59. Scharf HP, Mansmann U, Streitberger K, Witte S, Krämer J, Maier C, et al. Acupuncture
- 43 and knee osteoarthritis: a three-armed randomized trial. *Ann Intern Med* 2006;145(1):12-20.
- 44
- 45 60. Streitberger K, Witte S, Mansmann U, Knauer C, Krämer J, Scharf HP, et al. Efficacy and
- 46 safety of acupuncture for chronic pain caused by gonarthrosis: a study protocol of an ongoing
- 47 multi-centrerandomised controlled clinical trial [ISRCTN27450856]. *BMC Complement*
- 48
- 49
- 50
- 51
- 52
- 53
- 54
- 55
- 56
- 57
- 58
- 59
- 60

1  
2  
3  
4 Altern Med 2004;4:6.

5  
6 61. Williamson L, Wyatt MR, Yein K, Melton JT. Severe knee osteoarthritis: a randomized  
7 controlled trial of acupuncture, physiotherapy (supervised exercise) and standard  
8 management for patients awaiting knee replacement. *Rheumatology (Oxford)*  
9 2007;46(9):1445-49.

10  
11 62. Witt C, Brinkhaus B, Jena S, Linde K, Streng A, Wagenpfeil S, et al. Acupuncture in  
12 patients with osteoarthritis of the knee: a randomised trial. *Lancet* 2005;366(9480):136-43.

13  
14 63. Witt CM, Jena S, Brinkhaus B, Liecker B, Wegscheider K, Willich SN. Acupuncture in  
15 patients with osteoarthritis of the knee or hip: a randomized, controlled trial with an  
16 additional nonrandomized arm. *Arthritis Rheum* 2006;54(11):3485-93.

17  
18 64. Endres HG, Böwing G, Diener HC, Lange S, Maier C, Molsberger A, et al. Acupuncture  
19 for tension-type headache: a multicentre, sham-controlled, patient-and observer-blinded,  
20 randomised trial. *J Headache Pain* 2007;8(5):306-14.

21  
22 65. Melchart D, Streng A, Hoppe A, Brinkhaus B, Becker-Witt C, Hammes M, et al. The  
23 acupuncture randomised trial (ART) for tension-type headache--details of the treatment.  
24 *Acupunct Med* 2005;23(4):157-65.

25  
26 66. Melchart D, Streng A, Hoppe A, Brinkhaus B, Witt C, Wagenpfeil S, et al. Acupuncture in  
27 patients with tension-type headache: randomised controlled trial. *BMJ* 2005;331(7513):376-  
28 82.

29  
30 67. Söderberg E, Carlsson J, Stener-Victorin E. Chronic tension-type headache treated with  
31 acupuncture, physical training and relaxation training. Between-group differences.  
32 *Cephalalgia* 2006;26(11):1320-29.

33  
34 68. An GQ, Li N, Zhai GH, Liu HR, Sun JF, Liang HF, et al. Evaluation of the therapeutic  
35 effect of acupuncture and moxibustion on irritable bowel syndrome. *Shanghai Journal of*  
36 *Acupuncture and Moxibustion* 2010;29(6):354-56.

37  
38 69. Anastasi JK, McMahon DJ, Kim GH. Symptom management for irritable bowel  
39 syndrome: a pilot randomized controlled trial of acupuncture/moxibustion. *Gastroenterol*  
40 *Nurs* 2009;32(4):243-55.

41  
42 70. Chen Q. Clinical study on irritable bowel syndrome of diarrhea type with Chang-three-  
43 needle technique. Master's thesis of Guangzhou University of Traditional Chinese Medicine  
44 2011:1-29.

45  
46 71. Chen Y. Clinical research on treating irritable bowel syndrome mainly by acupuncture  
47 with warmed needles at Tiansh (ST25) and Dangchangshu (BL25). Master's thesis of  
48  
49  
50  
51  
52  
53  
54  
55  
56  
57  
58  
59  
60

1  
2  
3  
4 Guangzhou University of Traditional Chinese Medicine 2009;1-32.

5  
6 72. Chen YQ, Lai XS. Clinical observation on combined warming needle and patented  
7 Chinese medicine for irritable bowel syndrome. *Journal of Acupuncture and Tuina Science*  
8 2009;7:274-77.

9  
10 73. Forbes A, Jackson S, Walter C, Quraishi S, Jacyna M, Pitcher M. Acupuncture for  
11 irritable bowel syndrome: a blinded placebo-controlled trial. *World J Gastroenterol*  
12 2005;11(26):4040-44.

13  
14 74. Lembo AJ, Conboy L, Kelley JM, Schnyer RS, McManus CA, Quilty MT, et al. A  
15 treatment trial of acupuncture in IBS patients. *Am J Gastroenterol* 2009;104(6):1489-97.

16  
17 75. Li W. Treatment of warming needle moxibustion combined with spinal manipulation on  
18 irritable bowel syndrome. *China Practical Medicine* 2009;4(31):212-13.

19  
20 76. Liu Q, Wang Z, Zhang W, Zhang X. Clinical observation on Geshanxiaoyao Decoction  
21 combining acupuncture effect on the life quality of patients with irritable bowel syndrome.  
22 *Journal of Zhejiang University of Traditional Chinese Medicine* 2010;34(4):510-11, 13.

23  
24 77. Reynolds JA, Bland JM, MacPherson H. Acupuncture for irritable bowel syndrome an  
25 exploratory randomised controlled trial. *Acupunct Med* 2008;26(1):8-16.

26  
27 78. Schneider A, Enck P, Streitberger K, Weiland C, Bagheri S, Witte S, et al. Acupuncture  
28 treatment in irritable bowel syndrome. *Gut* 2006;55(5):649-54.

29  
30 79. Shi X, Luo J, Tan T. Clinical observation of electroacupuncture on diarrhea-predominant  
31 irritable bowel syndrome. *Journal of New Chinese Medicine* 2010;42(5):72-74.

32  
33 80. Sun JH, Wu XL, Xia C, Xu LZ, Pei LX, Li H, et al. Clinical evaluation of soothing Gan  
34 and Inbigorating Pi acupuncture treatment on dfiarrhea-predominant irritable bowel  
35 syndrome. *Chin J Integr Med* 2011;17(10):780-85.

36  
37 81. Wang Z, Liu Q, Zhang X, Wang Y, Su X. Clinical observation of “GeshanXiaoyao  
38 Decoction” plus acupuncture in treating diarrhea-predominant irritable bowel syndrome.  
39 *Shanghai Journal of Traditional Chinese Medicine* 2010;44(3):41-43.

40  
41 82. Wang Z, Liu Q, Zhang X, Zhang W. Geshanxiaoyao Decoction combining with  
42 acupuncture on 150 patients with diarrhea-predominant irritable bowel syndrome. *Liaoning*  
43 *Journal of Traditional Chinese Medicine* 2010;37(2):276-77.

44  
45 83. Xiong X, Lin Y. Acupuncture plus traditional Chinese herb medicine in treating 42  
46 patients with diarrhea-predominant IBS. *Journal of Fujian University of TCM* 2008;18(2):38-  
47 40.

48  
49 84. Xue Y, TianX. The clinical research of the relationship between radicals and irritable  
50  
51  
52  
53  
54  
55  
56  
57  
58  
59  
60

1  
2  
3  
4 bowel syndrome and the effect of acupuncture. Chinese Archives of Traditional Chinese  
5 Medicine 2009;27(1):111-12.  
6

7 85. Zeng Y, Bao Y, Chu J, Li H, Zhu G, Zhang W. Effect of moxibustion on diarrhea-  
8 dominant irritable bowel syndrome patients in dog days. Chinese Archives of Traditional  
9 Chinese Medicine 2010;28(8):1774-76.  
10

11 86. Borup L, Wurlitzer W, Hedegaard M, Kesmodel US, Hvidman L. Acupuncture as pain  
12 relief during delivery: a randomized controlled trial. Birth 2009;36(1):5-12.  
13

14 87. Hantoushzadeh S, Alhousseini N, Lebaschi AH. The effects of acupuncture during labour  
15 on nulliparous women: a randomised controlled trial. Aust N Z J Obstet Gynaecol  
16 2007;47(1):26-30.  
17

18 88. Huang T, Yang Y, Huang X. Selection of acupoints and opportunity for acupuncture  
19 analgesia in delivery. Journal of Traditional Chinese Medicine 2008;49(7):625-28.  
20

21 89. Mårtensson L, Stener-Victorin E, Wallin G. Acupuncture versus subcutaneous injections  
22 of sterile water as treatment for labour pain. Acta Obstet Gynecol Scand 2008;87(2):171-77.  
23

24 90. Qu F, Zhou J. Electro-acupuncture in relieving labor pain. Evid Based Complement  
25 Alternat Med 2007;4(1):125-30.  
26

27 91. Ziaei S, Hajipour L. Effect of acupuncture on labor. Int J GynaecolObstet 2006;92(1):71-  
28 72.  
29

30 92. Liu Z. Botulinum toxin A (BTX-A) point injection for treatment of the third lumbar  
31 transverse process syndrome. Zhongguo Zhen Jiu 2008;28(5):337-39.  
32

33 93. Elden H, Ladfors L, Olsen MF, Ostgaard HC, Hagberg H. Effects of acupuncture and  
34 stabilising exercises as adjunct to standard treatment in pregnant women with pelvic girdle  
35 pain: randomised single blind controlled trial. BMJ 2005;330(7494):761.  
36

37 94. Muller R, Giles LGF. Long-term follow-up of a randomized clinical trail assessing the  
38 efficacy of medication , acupuncture, and spinal manipulation for chronic mechanical spinal  
39 pain syndromes. J Manipulative Physiol Ther 2005;28(1):3-11.  
40

41 95. Deng G, Vickers A, Yeung S, D'Andrea GM, Xiao H, Heerdt AS, et al. Randomized,  
42 controlled trial of acupuncture for the treatment of hot flashes in breast cancer patients. J Clin  
43 Oncol 2007;25(35):5584-90.  
44

45 96. Vickers AJ, Feinstein MB, Deng GE, Cassileth BR. Acupuncture for dyspnea in advanced  
46 cancer: a randomized, placebo-controlled pilot trial [ISRCTN89462491]. BMC Palliat Care  
47 2005;4:5.  
48

49 97. Amir SH, Bano S, Khan RM, Ahmed M, Zia F, Nasreen F. Electro-stimulation at P6 for  
50  
51  
52  
53  
54  
55  
56  
57  
58  
59  
60

1  
2  
3  
4 prevention of PONV. *Journal of Anaesthesiology Clinical Pharmacology* 2007;23:383-86.

5 98. Sharma S, Goswami U. Evaluation of acupuncture for anti-emetic prophylaxis. *Journal of*  
6 *Anaesthesiology Clinical Pharmacology* 2007;23:401-04.

7  
8  
9 99. Liu HL, Wang LP. Randomized controlled study on ginger-salt-partitioned moxibustion at  
10 shenque (CV 8) on urination disorders poststroke. *Zhongguo Zhen Jiu* 2006;26(9):621-24.

11  
12 100. Kvist LJ, Hall-Lord ML, Rydhstroem H, Larsson BW. A randomised-controlled trial in  
13 Sweden of acupuncture and care interventions for the relief of inflammatory symptoms of the  
14 breast during lactation. *Midwifery* 2007;23(2):184-95.

15  
16  
17  
18  
19 \* The number of primary studies exceeds 92 because some trials analyzed in Cochrane  
20 reviews had at least two references.  
21  
22  
23  
24  
25  
26  
27  
28  
29  
30  
31  
32  
33  
34  
35  
36  
37  
38  
39  
40  
41  
42  
43  
44  
45  
46  
47  
48  
49  
50  
51  
52  
53  
54  
55  
56  
57  
58  
59  
60



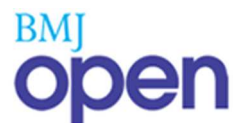

**Assessment of the quality of reporting for treatment components in Cochrane reviews of acupuncture**

|                                 |                                                                                                                                                                                                                                                                                                                                                                                                        |
|---------------------------------|--------------------------------------------------------------------------------------------------------------------------------------------------------------------------------------------------------------------------------------------------------------------------------------------------------------------------------------------------------------------------------------------------------|
| Journal:                        | <i>BMJ Open</i>                                                                                                                                                                                                                                                                                                                                                                                        |
| Manuscript ID:                  | bmjopen-2013-004136.R1                                                                                                                                                                                                                                                                                                                                                                                 |
| Article Type:                   | Research                                                                                                                                                                                                                                                                                                                                                                                               |
| Date Submitted by the Author:   | 15-Nov-2013                                                                                                                                                                                                                                                                                                                                                                                            |
| Complete List of Authors:       | Kim, Kun Hyung; School of Korean Medicine, Pusan National University, Department of Acupuncture and Moxibustion<br>Kang, Jung Won; College of Korean Medicine, Kyung Hee University, Department of Acupuncture and Moxibustion<br>Lee, Myeong Soo; Korea Institute of Oriental Medicine,<br>Lee, Jae Dong; College of Korean Medicine, Kyung Hee University, Department of Acupuncture and Moxibustion |
| <b>Primary Subject Heading</b>: | Complementary medicine                                                                                                                                                                                                                                                                                                                                                                                 |
| Secondary Subject Heading:      | Research methods, Complementary medicine                                                                                                                                                                                                                                                                                                                                                               |
| Keywords:                       | COMPLEMENTARY MEDICINE, STATISTICS & RESEARCH METHODS, MEDICAL EDUCATION & TRAINING                                                                                                                                                                                                                                                                                                                    |
|                                 |                                                                                                                                                                                                                                                                                                                                                                                                        |

SCHOLARONE™  
Manuscripts

1  
2  
3 **Assessment of the quality of reporting for treatment components**  
4  
5  
6 **in Cochrane reviews of acupuncture**  
7  
8

9  
10  
11 Kun Hyung Kim<sup>1</sup>, Jung Won Kang<sup>2</sup>, Myeong Soo Lee<sup>3</sup>, Jae Dong Lee<sup>2</sup>

12  
13 <sup>1</sup>*Division of Clinical Medicine, School of Korean Medicine, Pusan National University, Yangsan,*  
14 *South Korea*

15  
16 <sup>2</sup>*Department of Acupuncture & Moxibustion, College of Oriental Medicine, Kyung Hee University,*  
17 *Seoul, Republic of Korea*

18  
19 <sup>3</sup>*Medical Research Division, Korea Institute of Oriental Medicine, Daejeon, South Korea*  
20

21  
22 **Running Title:** STRICTA for Cochrane reviews of acupuncture  
23

24  
25  
26 **Source of support:** This work was supported by the Korea Institute of Oriental Medicine  
27 (K10101).  
28

29  
30 **Financial Disclosure:** None

31  
32 **Keywords:** acupuncture, Cochrane review, systematic review, STRICTA, CONSORT,  
33 reporting guideline  
34  
35

36  
37  
38 **Corresponding author :**

39  
40 Jae Dong Lee, KMD., PhD.

41  
42 Department of Acupuncture & Moxibustion, College of Korean Medicine

43  
44 Kyung Hee University,

45  
46 Seoul, 130-872, South Korea

47  
48 Tel : 82-(0) 2-958-9207

49  
50 Fax: 82-(0) 2-958-9211

51  
52 E-mail:ljdacu@gmail.com  
53  
54  
55  
56  
57  
58  
59  
60

## Abstract

**Objectives:** High quality reporting of treatment details can aid replication of study results in real-world clinical practice. The Standards for Reporting Interventions in Clinical Trials of Acupuncture (STRICTA) is a reporting guideline for key elements of acupuncture interventions in clinical trials. This study used STRICTA to investigate whether Cochrane reviews of acupuncture adequately report important treatment details.

**Design:** Systematic review

**Methods:** Cochrane reviews of acupuncture were identified from *The Cochrane Library* (Issue 7, 2012). Randomized controlled trials (RCTs) included in the reviews and published after 2005 were obtained. Using STRICTA, we extracted acupuncture-related information from both the Cochrane reviews and the RCTs. The Characteristics of included studies table was the major source of intervention information from Cochrane reviews. Reporting quality of acupuncture interventions in Cochrane reviews was assessed and compared to the respective RCTs.

**Results:** 25 Cochrane reviews of acupuncture and 92 RCTs met the selection criteria. Cochrane reviews were 16% less likely to report the acupuncture-related items of STRICTA than RCTs (risk ratio 0.84, 95% confidence interval 0.79 to 0.88,  $I^2=8\%$ ). Information was significantly better reported for 10 of the 15 treatment-group items of STRICTA in RCTs than in Cochrane reviews ( $p<0.05$ ), while four items did so without statistical significance. One item related to practitioner background was significantly better reported in Cochrane reviews.

**Conclusion:** Reporting quality of treatment details in Cochrane reviews of acupuncture was insufficient with regard to STRICTA, even though such information was readily reported in RCTs. The overall quality of reporting of the RCTs, while better than the reviews, was also often suboptimal. Use of STRICTA guideline during the review process is recommended to adequately report the key treatment components in Cochrane reviews of acupuncture. The

1  
2  
3 potential impact of STRICTA to the replicability and utilization of reviews in future research  
4  
5 and practice needs to be investigated.  
6  
7  
8

9  
10 **Strengths and limitations of this study**

- 11
- 12 • This study is the first investigation that revealed the avoidable incompleteness of  
13 reporting quality with regard to important treatment components of acupuncture in the  
14 Cochrane reviews, even though information was readily reported in relevant primary  
15 RCTs.  
16  
17
  - 18 • Our findings suggest there is a loss of treatment-related information during data  
19 abstraction for Cochrane reviews which may influence the replicability of trial  
20 interventions.  
21  
22
  - 23 • Whether loss of treatment-related information actually leads to the altered  
24 replicability of reported interventions in Cochrane reviews was not investigated.  
25  
26  
27  
28  
29  
30  
31  
32  
33  
34  
35  
36  
37  
38  
39  
40  
41  
42  
43  
44  
45  
46  
47  
48  
49  
50  
51  
52  
53  
54  
55  
56  
57  
58  
59  
60

## Background

Cochrane systematic reviews have summaries of study characteristics, which aim to include details of study interventions to be replicated in practice.<sup>1</sup> Developing methods to improve the descriptions of complex interventions are considered as essential task to complement existing systematic review methodology.<sup>2</sup> Therefore, adherence to international standards for reporting interventions might be helpful for detailed description of study interventions in Characteristics summaries in Cochrane systematic reviews. The Standards for Reporting Interventions in Clinical Trials of Acupuncture (STRICTA) is an internationally recommended standard for reporting details of acupuncture interventions in clinical trials of acupuncture. It can be used to provide sufficient information for researchers or clinicians to understand acupuncture interventions used in the study and replicate them in other researches or practices.<sup>3</sup> Consolidated Standards of Reporting Trials (CONSORT) for non-pharmacological treatments has also suggested to provide detailed information for study interventions thus to improve the uptake of study results in studies of complex interventions, including surgery, psychological interventions and acupuncture.<sup>4</sup> However, many current trials and reviews have been found to often omit crucial details of non-pharmacological treatments.<sup>5</sup> In case of Cochrane reviews, clear description on the intervention of interests has been emphasized to improve applicability of review into real clinical practice.<sup>6</sup> To the best of our knowledge, however, there is no study assessing whether Cochrane reviews provide satisfactory description on any particular intervention by adopting standards for reporting interventions. Although previous researches focused on managing the reporting quality of Cochrane review in terms of methodological process,<sup>7</sup> the reporting quality for interventions in Cochrane review had been largely ignored. Hence, this study aimed to assess the reporting quality of acupuncture treatment-related information in the Cochrane reviews of acupuncture, as well as to investigate whether utilization of the reporting guideline for treatment

1  
2  
3  
4  
5  
6  
7  
8  
9  
10  
11  
12  
13  
14  
15  
16  
17  
18  
19  
20  
21  
22  
23  
24  
25  
26  
27  
28  
29  
30  
31  
32  
33  
34  
35  
36  
37  
38  
39  
40  
41  
42  
43  
44  
45  
46  
47  
48  
49  
50  
51  
52  
53  
54  
55  
56  
57  
58  
59  
60

intervention can improve the quality of reporting in Cochrane reviews of acupuncture.

For peer review only

## Methods

### Search strategy and selection criteria for Cochrane reviews of acupuncture

Cochrane Database of Systematic Reviews (CDSR) of Issue 7, March 2012 were searched to identify Cochrane reviews of acupuncture using the term “acupuncture”. Cochrane reviews that investigated acupuncture as a primary treatment intervention or as one of various treatment or control interventions with at least one primary component study that assessed the effects of acupuncture were included. Reviews without any included study (i.e., empty reviews) or reviews that did not include acupuncture-related studies were excluded.

### Search strategy and selection criteria for component studies in eligible Cochrane reviews of acupuncture

Component study was defined as a study included in the Cochrane review regardless of the contribution to the qualitative or quantitative analyses. These were searched using the reference citation information provided in the relevant Cochrane reviews. Among studies in eligible Cochrane systematic reviews, only trials published since 2005 were considered to be analyzed in this study. This is because of the possible necessary time-span for uptake of STRICTA guideline. This approach is similar to the work of Prady et al. (2008) which analyzed acupuncture studies published after 3 to 4 years following the publication of STRICTA.<sup>8</sup> Component studies which involved the assessment of acupuncture as a treatment or control intervention were eligible in our study. The term “acupuncture” was defined as interventions involving penetration of certain points on the skin by needling regardless of manual or electrical stimulation, since the needling is believed to be the most representative feature of acupuncture and STRICTA items were originally developed for the reporting of needle acupuncture in clinical studies.<sup>3</sup> Thus, component studies using other types of non-penetrating stimulation on acupuncture points, such as laser acupuncture, acupressure,

1  
2  
3 device-involved acupuncture point stimulation (i.e., wrist band application) and injections on  
4  
5 acupuncture points were excluded. Studies employing stimulation on non-classical  
6  
7 acupuncture points, such as trigger points, were eligible only if they clearly mentioned the  
8  
9 intervention was “acupuncture” in the review.  
10

### 11 12 13 14 **Data extraction in Cochrane reviews of acupuncture**

15  
16 Intervention details for acupuncture treatments in tables for characteristics of included  
17  
18 component studies were extracted in each Cochrane review. Characteristics of included  
19  
20 component studies were chosen for the main data source of our analysis because they intend  
21  
22 to provide sufficient information on various study components including details of  
23  
24 interventions to enable readers to understand the study better or replicate interventions in  
25  
26 their own contexts.<sup>1</sup> Methods and results of the included Cochrane reviews were also  
27  
28 examined to identify further acupuncture-related information which was not reported in the  
29  
30 tables. Two independent authors underwent these processes.  
31  
32

33  
34 General characteristics of each component study, including publication languages (English or  
35  
36 non-English), type of control groups in primary component studies, publication or last-  
37  
38 updated years and number of included studies in the Cochrane reviews were extracted.  
39  
40 Whether clinical heterogeneity related to the acupuncture treatments were planned to be  
41  
42 investigated by subgroup, sensitivity or other analysis regardless of the availability of those  
43  
44 analyses were also identified. One review author conducted these processes.  
45  
46  
47  
48

### 49 50 **Data extraction in component studies**

51  
52 For included studies to be analyzed, full-texts were obtained to check whether there is any  
53  
54 difference of reported information for acupuncture treatments in terms of STRICTA items  
55  
56 between the primary component studies and the Cochrane review. This was done to identify  
57  
58  
59  
60



1  
2  
3 any selective omission of treatment-related information by the Cochrane review author.  
4  
5 Published protocols or supplements of included studies for more detail information were  
6  
7 further sought when the primary component studies had relevant information for tracking  
8  
9 such data (i.e., citation information in the reference or web-appendix provided by the  
10  
11 component study).  
12

### 13 14 15 16 **Selection of STRICTA items for data extraction**

17  
18 Acupuncture-related items of STRICTA were used to assess the quality of reporting for  
19  
20 acupuncture treatment-related information in Cochrane reviews of acupuncture. Items with  
21  
22 regard to the description of the comparison interventions were not used, because the main  
23  
24 interest of this review was to assess the completeness of description of the acupuncture  
25  
26 treatment itself. The revised STRICTA checklist published in 2010 served as a primary  
27  
28 source of extraction form of acupuncture-related information.<sup>3</sup>  
29  
30  
31

### 32 33 34 **Rating methods of items in STRICTA**

35  
36 Each item of STRICTA was rated with a dichotomous scale (i.e., “reported” or “not  
37  
38 reported”). The rating of “reported” was given when relevant information is at least partially  
39  
40 reported in the Cochrane review or primary component studies. The rating of “not reported”  
41  
42 was given when relevant information is completely lacked in the Cochrane reviews or  
43  
44 primary component studies. When there is written evidence in the Cochrane review that the  
45  
46 review authors attempted to report and sought the relevant information but could not find it in  
47  
48 the component study, the item was rated as successfully reported one in the Cochrane review.  
49  
50 Our approach is in line with the Preferred Reporting Items for Systematic Reviews and Meta-  
51  
52 Analyses (PRISMA) statements that stressed the importance of reporting all variables for  
53  
54 which data were sought, regardless of its availability in the component studies.<sup>7</sup> STRICTA  
55  
56  
57  
58  
59  
60

1  
2  
3 recommends reporting of actually performed acupuncture intervention, rather than reporting  
4 of treatment protocols without any evidence of implementation. However, we assumed the  
5 reporting of Cochrane reviews or of component studies as performed, because distinctions  
6 were not clear in most cases.  
7  
8  
9  
10

### 11 12 13 14 **Inquiries to the review authors and review groups**

15  
16 One author (KKH) visited websites of relevant Cochrane review groups (CRGs) to see  
17 whether any reporting guidelines for acupuncture-related intervention were provided for  
18 review authors. (accessed at 12<sup>th</sup> July 2012) E-mail queries were sent to the contact point of  
19 CRGs. Two questions were used for the survey, as follows: “Do your CRG have a policy or  
20 specific recommendations about the reporting details of acupuncture interventions for review  
21 authors? If any, please specify” and “Have you ever recommended any specific guideline for  
22 reporting details of acupuncture interventions for the review to review authors? If any, please  
23 specify”, respectively. Similar e-mail queries with four questions were sent to the  
24 correspondence of the included Cochrane reviews (Table 2). This was done to check if CRGs  
25 or review authors had been aware the existence of reporting guidelines of acupuncture (i.e.,  
26 STRICTA), had or had been recommended to use reporting guidelines for detailed  
27 description of interventions regarding acupuncture.  
28  
29  
30  
31  
32  
33  
34  
35  
36  
37  
38  
39  
40  
41  
42  
43  
44

### 45 **Training of trial assessors**

46  
47 Two reviewers (KHK and JWK), both experienced acupuncture researchers and systematic  
48 reviewers, received training on STRICTA assessment checklists. The training course aimed to  
49 minimize inconsistency in data extraction and scoring. Ten trials in the Cochrane reviews that  
50 were published before 2005 thus excluded in our analyses were randomly selected for initial  
51 scoring by both reviewers. Two reviewers independently assessed and scored the quality of  
52  
53  
54  
55  
56  
57  
58  
59  
60

1  
2  
3 reporting in terms of acupuncture treatment-related information of ten component trials in the  
4  
5 Cochrane reviews. Following this, we attempted to develop and re-assure the standardized  
6  
7 scoring instruction for the main analysis.  
8  
9

### 10 11 12 **Statistical analysis**

13  
14 The number of items rated as “reported” in the Cochrane review was compared with those in  
15  
16 the relevant primary component studies. Results were presented as risk ratios (RR) with 95%  
17  
18 confidence intervals (CI). Random effects model was used, and heterogeneity was analysed  
19  
20 using a Chi<sup>2</sup> test on N-1 degrees of freedom, with an alpha of 0.05 used for statistical  
21  
22 significance and with the I<sup>2</sup> statistic. The number and proportion of component studies in the  
23  
24 Cochrane reviews and the original RCTs that reported information for each STRICTA item  
25  
26 was compared using the McNemar test as percentage reported with binomial 95% confidence  
27  
28 intervals. STATA version 10.0 (Stata-Corp, College Station, Texas) and RevMan 5.2 (The  
29  
30 Nordic Cochrane Centre, Copenhagen) was used for statistical analyses and the forest plot,  
31  
32 respectively.  
33  
34  
35  
36  
37  
38  
39  
40  
41  
42  
43  
44  
45  
46  
47  
48  
49  
50  
51  
52  
53  
54  
55  
56  
57  
58  
59  
60

## Results

Totally 74 Cochrane reviews were identified following the search of CDSR, of which 26 reviews with 96 component studies were deemed to be eligible. Among them, one review and four component studies were excluded from the analysis, because of the wrong citation (n=3) and no accessibility (n=1) of component studies that resulted in the analysis of 25 reviews and 92 component studies. (Figure 1)

### Study characteristics

Of the 25 included Cochrane reviews of acupuncture, 17 reviews (68%) evaluated acupuncture as a primary intervention of interest. The median value of publication year or year that last update were performed was 2010. 12 reviews (48%) attempted to investigate the clinical heterogeneity related to acupuncture treatment by the means of subgroup, sensitivity or other type of analysis (i.e., acupuncture adequacy test).

Of the 92 component studies, 58 studies (63%) were published in English. The median value of publication year of component studies published after 2005 was 2007. Type of comparison to acupuncture was non-acupuncture interventions (n=68, 74%), sham acupuncture (n=34, 37%) and active acupuncture treatments (n=14, 15%). Details of characteristics for Cochrane acupuncture reviews and component studies are provided in Table 1.

### Review policy or recommendations for the reporting acupuncture intervention

No CRG policy or recommendations given to the review author for reporting of acupuncture treatment were identified by an e-mail survey to the CRG correspondence or review authors. Five of 16 CRGs replied that the Cochrane Handbook should serve as a general standard guideline for reporting in the review, although no detailed instructions or any recommendations for reporting the details or at least core components of complex

1  
2  
3 interventions such as acupuncture were provided to authors. One CRG of the Cochrane  
4  
5 review that did not evaluate acupuncture as primary intervention reported that they sought the  
6  
7 feedback from an acupuncture specialist during editorial process. Less than half of reviewers  
8  
9 (44%) reported that they were aware of STRICTA and only 16% of reviewers had utilized  
10  
11 STRICTA during the review process. Reviewers did not receive either recommendation or  
12  
13 restriction in terms of reporting acupuncture treatment during their review process (Table 2).  
14  
15

### 16 17 18 **STRICTA reporting in the Cochrane reviews and in the component studies** 19

20  
21 Risk ratio of the reporting rate of STRICTA items was 0.84 (95% confidence interval 0.79 to  
22  
23 0.88,  $I^2=8\%$ ), indicating that Cochrane reviews were 16% less likely to report the  
24  
25 acupuncture-related items of STRICTA than component RCTs (Figure 2). Information was  
26  
27 significantly better reported for 10 of the 15 acupuncture treatment-related items of STRICTA  
28  
29 in RCTs than in Cochrane reviews ( $p<0.05$ ), while four items did so without statistical  
30  
31 significance (Table 3). The most significant difference of reporting rate was found for the  
32  
33 item A2 (reasoning of treatment) and B9 (needle type) with better reporting in 39.1 % and  
34  
35 45.7 % of RCTs, respectively. One item (E1) related to practitioner background was  
36  
37 significantly better reported in Cochrane reviews. Four items including A2 (reasoning of  
38  
39 treatment), B4 (depth of insertion), D1 (details of other treatments) and D2 (setting and  
40  
41 context) were reported in less than half of component studies in the Cochrane reviews and of  
42  
43 RCTs.  
44  
45  
46  
47  
48  
49  
50  
51  
52  
53  
54  
55  
56  
57  
58  
59  
60

## Discussion

This study is the first systematic investigation of selective reporting in terms of details of interventions in the Cochrane reviews of acupuncture. We found some items which have been regarded as core components of acupuncture treatments were not reported in the Cochrane review, even though those information was already reported in the component RCTs. Details of interventions were significantly better reported in the RCTs in most items of STRICTA. This was achieved without further contact of authors of RCTs, which might imply the improvement of the reporting quality in terms of intervention details could be achieved directly by adopting STRICTA as a guideline for data abstraction by reviewers, editorials and peer-reviewers. However, no specific recommendation or guidelines for review authors were provided by CRG, and only minor portion of review authors or members of CRGs were identified to be aware of the existing CONSORT extension version of acupuncture. Overall, there is an insufficient reporting of acupuncture details which could have been improved if the existing reporting guidelines were well utilized in the review process.

In our review, less reporting of treatment-related information in the Cochrane reviews was observed in most of selected STRICTA items. To some extent, missing details of complex intervention might be inevitable during abstraction of information due to the complexity in practice.<sup>5</sup> However, some items showed almost compatible or even better reporting quality in the Cochrane reviews than in the RCTs. For example, information regarding the practitioner qualification was relatively well-reported (over 60% of component studies). Some of mechanical aspects of acupuncture treatments were also relatively well-reported both in Cochrane reviews and primary component studies, although some showed modest reporting quality both in Cochrane reviews and RCTs. Item B9 (Needle type) showed the most difference (45.7% difference) of reporting rates between Cochrane reviews and primary

1  
2  
3 component studies. This is in line with the previous research that common missing element of  
4  
5 non-pharmacological interventions in randomized controlled trials were materials necessary  
6  
7 to provide the intervention (51%) and details about intervention-related procedures (46%)  
8  
9 published in six major general medical journals.<sup>10</sup> On the contrary, poor reporting of  
10  
11 contextual factors (D1; details of other treatments, D2; setting and context, D3; Patient-  
12  
13 practitioner interaction) was obvious both in Cochrane reviews and primary component  
14  
15 studies. Although treatment context can have a significant influence on treatment effects,<sup>11</sup>  
16  
17 reporting information related to study contexts and patient-practitioner interactions seems to  
18  
19 have been largely ignored by researchers of complex intervention.<sup>12</sup> Since acupuncture is a  
20  
21 practitioner-dependent, non-pharmacological complex intervention,<sup>13</sup> sufficient details of  
22  
23 intervention delivered and study contexts might be of particular importance to enable readers  
24  
25 to consider the application and reproduction of review results in different treatment settings.<sup>12</sup>  
26  
27  
28  
29 Items that explain theoretical background of acupuncture intervention were also largely  
30  
31 underreported in Cochrane reviews of acupuncture, although theoretically-derived therapeutic  
32  
33 actions or strategies in complex interventions such as acupuncture may also have an  
34  
35 important role in constituting overall therapeutic effects.<sup>13</sup> It is still unclear for acupuncture  
36  
37 which component exerts therapeutic effects which combination of potential therapeutic  
38  
39 components works best, or whether combination of several components during the  
40  
41 acupuncture treatment is additive or synergistic.<sup>14</sup> Therefore, it would be a reasonable  
42  
43 suggestion for reviewers to report component factors of acupuncture that seems potentially  
44  
45 contributable to the effectiveness which are well-represented in STRICTA, until future  
46  
47 researches elucidate the therapeutic role of each component or group of components in the  
48  
49 acupuncture treatment.  
50  
51  
52  
53  
54  
55  
56  
57  
58  
59  
60

1  
2  
3 One possible explanation of inconsistent and suboptimal reporting of acupuncture treatment-  
4 related information would be that the Cochrane reviewers might not perceive some items of  
5 STRICTA as relevant to their review and selectively depicted some items of STRICTA. In a  
6  
7 small survey of Prady et al., some trialists and Cochrane review authors did not perceive  
8  
9 some items of the previous version of STRICTA as relevant to acupuncture treatments.<sup>15</sup>  
10  
11

12  
13  
14 Another reason might be a lack of standard reporting guideline for interventions in the  
15  
16 Cochrane review. Either Cochrane review authors or CRG correspondence reported that they  
17  
18 did not know the existence of reporting guidelines for acupuncture. To date, however, there is  
19  
20 no study investigating reasons for the selective reporting intervention-related information  
21  
22 (including acupuncture) in Cochrane reviews. Since information related to the treatment  
23  
24 intervention is essential to enhance the external validity, applicability and implementation of  
25  
26 results of systematic review,<sup>5</sup> barriers to the optimal quality of reporting for treatment  
27  
28 intervention should be explored and tackled in future studies.  
29  
30  
31

32  
33  
34 Removal of STRICTA-specific information in the reporting due to the journal's space  
35  
36 constraints or suggestions of editors as well as peer-reviewers was addressed by some trial  
37  
38 authors.<sup>15</sup> This may be the case for the systematic review published in non-Cochrane medical  
39  
40 journals which have limited word counts.<sup>15</sup> In our research, the possibility of potential  
41  
42 influence of space constraints on suboptimal reporting seems unlikely because Cochrane  
43  
44 review allows review authors to describe the main characteristics of each included study  
45  
46 without any space constraints. However, lack of comparison of the reporting quality of  
47  
48 acupuncture intervention in Cochrane reviews with those in non-Cochrane reviews published  
49  
50 in journals with space-constraints do not provide evidence to support this argument. Future  
51  
52 research incorporating both Cochrane and non-Cochrane reviews may reveal whether there is  
53  
54 any systematic differences of reporting quality in terms of the details of treatment  
55  
56  
57  
58  
59  
60



1  
2  
3 intervention between Cochrane and non-Cochrane reviews, thus space-constraints could be  
4  
5 an influencing factor to the reporting quality of intervention-related information or not.  
6  
7

8  
9  
10 Evaluation of internal validity has been put on great emphasis in the Cochrane systematic  
11  
12 reviews.<sup>9,16</sup> However, evaluating applicability of review results may also be of similar  
13  
14 importance, since uptake and reproduction of review results may be able to change the  
15  
16 routine clinical practice toward evidence-based practice.<sup>5</sup> Lack of consideration of external  
17  
18 validity is a major criticism of systematic reviews and RCTs, and is a potential threat of poor  
19  
20 uptake of evidence into routine clinical practice.<sup>17-20</sup> Intervention details and treatment  
21  
22 contexts which STRICTA aims to address are suggested as the determinants of external  
23  
24 validity in trial, systematic review and guideline publications,<sup>12, 23</sup> although little is known  
25  
26 whether detailed description of acupuncture interventions in systematic reviews can affect  
27  
28 uptake of evidence in practice. Whether selective reporting of acupuncture interventions  
29  
30 observed in our study would influence the uptake of evidence may deserve further research.  
31  
32  
33  
34  
35

### 36 **Strengths and weakness**

37  
38 STRICTA is the best representative recommendation agreed by international acupuncture  
39  
40 experts, constituting core components of acupuncture treatment that may be inter-related.<sup>3</sup>  
41  
42 However, STRICTA had not been developed to measure the quality of reporting acupuncture  
43  
44 interventions, although we summed the scores of each items to score the overall quality of  
45  
46 reporting acupuncture interventions. Since this method is not based on the original purpose of  
47  
48 STRICTA and there is no weighting criteria for each items, interpretations of our results  
49  
50 should be cautious.<sup>8</sup> The scores should not be understood as the exact quantitative estimates  
51  
52 across the studies, but as possible indicators of incompleteness of reporting details of  
53  
54 acupuncture.  
55  
56  
57  
58  
59  
60

1  
2  
3  
4  
5 Results of rating might be prone to subjective assessment, although extensive training of  
6 authors using CONSORT elaboration document<sup>3</sup> were preceded. Two assessors were  
7 unblinded to the study characteristics, such as publication dates or allocation of acupuncture  
8 as a primary or control intervention. Since both assessors are acupuncture researchers as well  
9 as practitioners thus may be familiar with included acupuncture studies, we did not attempt to  
10 blind the assessors. Prady et al. found that unblinded assessor gave higher scores to some of  
11 acupuncture studies in terms of items of STRICTA, although this tendency was not consistent  
12 in the rest of studies to be assessed.<sup>8</sup> Nevertheless, unblinded assessors with prior knowledge  
13 of study characteristics in our review may have introduced bias.  
14  
15  
16  
17  
18  
19  
20  
21  
22  
23  
24  
25  
26

27 The first STRCITA was published in 2001, and as a revised version in 2010. We adopted the  
28 revised version of STRICTA for studies which had been published both before and after it.  
29 Thus, component studies published before the publication of revised STRICTA may not  
30 address the some revised items assessed in this review. This may have yielded a systematic  
31 bias when assessing the component studies by disadvantaging articles following a previous  
32 version of the guideline.<sup>8</sup> Nevertheless, the utilization of the latest version of STRICTA was  
33 justified in our study with three reasons: First, the CONSORT initiatives recommended the  
34 use of most recently released version of reporting standards when reporting and analyzing  
35 RCTs.<sup>21</sup> Second, the ultimate aim of using STRCITA in this study was not to score  
36 component studies per each item, but to reflect whether and how Cochrane reviews report or  
37 omit essential component of acupuncture treatments which were deemed the best  
38 representation of consensus across international acupuncture experts. Third, we identified that  
39 selected components for this review in the original STRICTA and in the revised one is almost  
40  
41  
42  
43  
44  
45  
46  
47  
48  
49  
50  
51  
52  
53  
54  
55  
56  
57  
58  
59  
60

1  
2  
3 consistent enough to justify the use of the latest version of STRICTA. In this sense, the latest  
4  
5 version of STRICTA was preferred.  
6  
7

8  
9  
10 Uptake of reporting guidelines by individual researchers and journal editors may take longer  
11  
12 than expected. A survey of author instructions conducted in 2007 revealed that only 38% of  
13  
14 165 high-impact journals endorsed the CONSORT statement, which was initially published in  
15  
16 1996.<sup>22</sup> The median values of the publication years of the primary component studies and  
17  
18 Cochrane reviews used in this study were 2007 and 2010, respectively. The first STRICTA  
19  
20 statement was published in 2001, and insufficient time may have elapsed to justify our  
21  
22 research. This should be recognized as a weakness of our study, and future follow-up studies  
23  
24 may overcome this issue.  
25  
26

27  
28  
29 We did not contact authors of the primary component studies to gain additional information  
30  
31 with regard to the under-reported items of STRICTA. This was because our primary interest  
32  
33 is to identify selective reporting / omissions of acupuncture-related information during the  
34  
35 review process in the Cochrane reviews. Given the authors of primary component studies are  
36  
37 often contacted to gain additional information when conducting systematic review, however,  
38  
39 our study might not reflect common information-seeking procedure during review process.  
40  
41 Author contact would have brought to what extent Cochrane reviews could have  
42  
43 comprehensively described the treatment-related information of acupuncture based on the  
44  
45 standard author query process recommended in the Cochrane handbook.<sup>23</sup> Future follow-up  
46  
47 study may address such limitation.  
48  
49  
50

#### 51 52 53 **Implication for future research** 54 55

1  
2  
3 Factors associated with how and why review authors selectively summarize the treatment  
4  
5 intervention during the review process should be investigated to identify the potential barrier  
6  
7 of optimal quality of reporting in Cochrane reviews of acupuncture. Recent empirical  
8  
9 evidence supports that the utilization of reporting guideline (i.e., CONSORT, STROBE,  
10  
11 TREND and STARD) with regard to general methodological issues during peer review  
12  
13 processes improves the quality of publication in biomedical journals.<sup>24</sup> Whether and how  
14  
15 reporting guidelines for the description of treatment intervention such as STRICTA can be  
16  
17 efficiently utilized during editorial and peer-review process and provided as author-support  
18  
19 resources in CRG websites should be explored to improve the reporting quality of treatment  
20  
21 intervention. Whether and how reporting items of STRICTA explaining theoretical  
22  
23 background, mechanical aspects and contextual factors of acupuncture could contribute to the  
24  
25 investigation of clinical heterogeneity of acupuncture treatments and their potential impacts  
26  
27 on the direction and significance of effect estimates should also be explored. Whether loss of  
28  
29 treatment-related information actually leads to an altered replicability of reported  
30  
31 interventions in Cochrane reviews was not investigated in this study, and should also be  
32  
33 investigated in future research.  
34  
35  
36  
37  
38  
39

## 40 **Conclusions**

41  
42 The reporting quality of treatment details in Cochrane reviews of acupuncture was  
43  
44 insufficient with regard to STRICTA recommendation, even though information was readily  
45  
46 reported in primary component studies. STRICTA was rarely utilized by CRGs and review  
47  
48 authors. Use of STRICTA guideline for the reporting treatment details in Cochrane reviews  
49  
50 and peer-review process should be considered to improve the replicability and utilization of  
51  
52 review results in future research and clinical practice.  
53  
54  
55  
56  
57  
58  
59  
60

**Contributorship Statement**

Kim KH conceived and designed the study. Kim KH searched the literature from electrical databases. Kim KH and Kang JW analyzed the data. Lee MS and Lee JD provided critical comments and contributed to the interpretation of analyzed results. Kim KH wrote the first draft of this manuscript. All authors read and revised the draft

**Funding**

This work was supported by the Korean Institute of Oriental Medicine

**Competing Interests**

None

**Data Sharing Statement**

Authors adhere to the data sharing statement of BMJ Open. Please send an e-mail to the first author (Kim KH) to obtain additional unpublished data.

## References

1. Schunemman HJ, Oxman AD, Higgins JPT, Vist GE, Glasziou P, Guyatt GH. Chapter 11: Presenting results and 'Summary of findings' table. In: Higgins JPT, Green S (editors). *Cochrane Handbook for Systematic Reviews of Interventions*. Chichester (UK): John Wiley & Sons, 2008.
2. Shepperd S, Lewin S, Straus S, *et al*. Can we systematically review studies that evaluate complex interventions? *PLoS Med* 2009;6: e1000086.doi: 10.1371/journal.pmed.1000086.
3. MacPherson H, Altman DG, Hammerschlag R, *et al*. Revised STandards for Reporting Interventions in Clinical Trials of Acupuncture (STRICTA): extending the CONSORT statement. *PLoS Med*. 2010;7: e1000261.doi: 10.1371/journal.pmed.1000261.
4. Boutron I, Moher D, Altman DG, *et al*. Extending the CONSORT statement to randomized trials of nonpharmacologic treatment: explanation and elaboration. *Ann Intern Med* 2008;148:295-309.
5. Glasziou P, Meats E, Heneghan C, Shepperd S. What is missing from descriptions of treatment in trials and reviews? *BMJ* 2008;336:1472-4.
6. Schunemman HJ, Oxman AD, Vist GE, Higgins JPT, Deeks JJ, Glasziou P, Guyatt GH. Chapter 12: Interpreting results and drawing conclusions. In: Higgins JPT, Green S (editors). *Cochrane Handbook for Systematic Reviews of Interventions*. Chichester (UK): John Wiley & Sons, 2008.
7. Liberati A, Altman DG, Tetzlaff J, *et al*. The PRISMA statement for reporting systematic reviews and meta-analyses of studies that evaluate healthcare interventions: explanation and elaboration. *BMJ* 2009;339: doi: 10.1136/bmj.b2700.doi: 10.1136/bmj.b2700.
8. Prady SL, Richmond SJ, Morton VM, Macpherson H. A systematic evaluation of the impact of STRICTA and CONSORT recommendations on quality of reporting for acupuncture trials. *PLoS One* 2008;3: e1577.doi: 10.1371/journal.pone.0001577.
9. Ahmad N, Boutron I, Dechartres A,*et al*. Applicability and generalisability of the results of systematic reviews to public health practice and policy: a systematic review. *Trials* 2010;11:20.doi: 10.1186/1745-6215-11-20.
10. Hoffman T, Glasziou P, Erueti C. Poor description of non-drug interventions: a remediable barrier to usage of evidence in practice? (P132). Abstracts of the 20th Cochrane Colloquium, 30 September

- 1  
2  
3 - 3 October 2012, Auckland, New Zealand Cochrane Database of Systematic Reviews, Supplement  
4  
5 2012: Art No. CD201200. doi:101002/14651858CD201200. 2012.  
6  
7 11. Kaptchuk TJ, Kelley JM, Conboy LA, *et al.* Components of placebo effect: randomised controlled  
8  
9 trial in patients with irritable bowel syndrome. *BMJ* 2008;336:999-1003.  
10  
11 12. Wells M, Williams B, Treweek S, *et al.* Intervention description is not enough: evidence from an  
12  
13 in-depth multiple case study on the untold role and impact of context in randomised controlled trials  
14  
15 of seven complex interventions. *Trials* 2012;13:95. doi: 10.1186/1745-6215-13-95.  
16  
17 13. Paterson C, Dieppe P. Characteristic and incidental (placebo) effects in complex interventions such  
18  
19 as acupuncture. *BMJ* 2005;330:1202-5.  
20  
21 14. Macpherson H, Tilbrook H, Bland MJ, *et al.* Acupuncture for irritable bowel syndrome: primary  
22  
23 care based pragmatic randomised controlled trial. *BMC Gastroenterol*  
24  
25 2012;12:150. doi:10.1186/1471-230X-12-150.  
26  
27 15. Prady SL, Macpherson H. Assessing the utility of the standards for reporting trials of acupuncture  
28  
29 (STRICTA): a survey of authors. *J Altern Complement Med* 2007;13(9):939-43.  
30  
31 16. Higgins JPT, Altman DG (editors). Chapter 8: Assessing risk of bias in included studies. In:  
32  
33 Higgins JPT, Green S (editors). *Cochrane Handbook for Systematic Reviews of Interventions*.  
34  
35 Chichester (UK): John Wiley & Sons, 2008.  
36  
37 17. Eldridge S, Ashby D, Bennett C, *et al.* Internal and external validity of cluster randomised trials:  
38  
39 systematic review of recent trials. *BMJ* 2008;336:876-80.  
40  
41 18. Ethgen M, Boutron L, Steg PG, *et al.* Quality of reporting internal and external validity data from  
42  
43 randomized controlled trials evaluating stents for percutaneous coronary intervention. *BMC Med*  
44  
45 *Res Methodol* 2009;9:24. doi: 10.1186/1471-2288-9-24.  
46  
47 19. Rothwell PM. Assessment of the external validity of randomised controlled trials. In: Rothwell PM,  
48  
49 editor. *Treating individuals: From randomised trials to personalised medicine*. Spain: Elsevier; 2007.  
50  
51 p. 61-82.  
52  
53 20. Purepong N, Jitvimonrat A, Sitthipornvorakul E, *et al.* External validity in randomised controlled  
54  
55 trials of acupuncture for osteoarthritis knee pain. *Acupunct Med* 2012;30:187-94.  
56  
57  
58  
59  
60

- 1  
2  
3 21. <http://www.consort-statement.org/>. [Assessed 9th Sep, 2013].  
4  
5 22. Hopewell S, Altman DG, Moher D, Schulz KF. Endorsement of the CONSORT Statement by high  
6  
7 impact factor medical journals: a survey of journal editors and journal 'Instructions to Authors'.  
8  
9 *Trials* 2008;9:20.doi: 10.1186/1745-6215-9-20.  
10  
11 23. Higgins JPT, DeeksJJ (editors). Chapter7: Selecting studies and collecting data. In: Higgins JPT,  
12  
13 Green S (editors). *Cochrane Handbook for Systematic Reviews of Interventions*. Chichester (UK):  
14  
15 John Wiley & Sons, 2008.  
16  
17 24. Cobo E, Cortés J, Ribera JM, *et al*. Effect of using reporting guidelines during peer review on  
18  
19 quality of final manuscripts submitted to a biomedical journal: masked randomised trial.  
20  
21 *BMJ* 2011;343:d6783.doi: 10.1136/bmj.d6783.  
22  
23  
24  
25  
26  
27  
28  
29  
30  
31  
32  
33  
34  
35  
36  
37  
38  
39  
40  
41  
42  
43  
44  
45  
46  
47  
48  
49  
50  
51  
52  
53  
54  
55  
56  
57  
58  
59  
60



Table 1. General characteristics of Cochrane reviews related to acupuncture

|                                                                    | Included Cochrane reviews<br>N=25 |
|--------------------------------------------------------------------|-----------------------------------|
| <b>Number of Cochrane reviews, N(%)</b>                            |                                   |
| Acupuncture as primary                                             | 17                                |
| Acupuncture as secondary                                           | 8                                 |
| <b>Number of component study</b>                                   |                                   |
| Total                                                              | 409                               |
| Mean                                                               | 16.36 (11.77)                     |
| Median (Q1-Q3)                                                     | 13 (3 – 47)                       |
| <b>Number of component study published after 2005</b>              |                                   |
| Total                                                              | 92                                |
| Mean                                                               | 3.7 (3.85)                        |
| Median (Q1-Q3)                                                     | 2 (1 – 5)                         |
| <b>Publication language of component studies after 2005, N (%)</b> |                                   |
| Total                                                              | 92                                |
| English                                                            | 58 (63%)                          |
| Languages other than English                                       | 34 (37%)                          |
| <b>Number of component studies published in</b>                    |                                   |
| Acupuncture-related journal                                        | 47                                |
| Western medicine journal                                           | 43                                |
| <b>Publication year</b>                                            |                                   |
| Cochrane review (Q1-Q3)                                            | 2010 (2008-2011)                  |
| Component studies (Q1-Q3)                                          | 2007 (2006-2008)                  |
| <b>Types of control*, N (%)</b>                                    |                                   |
| Sham acupuncture                                                   | 34 (37%)                          |
| Active acupuncture                                                 | 14 (15%)                          |
| Non-acupuncture                                                    | 68 (74%)                          |
| <b>Clinical heterogeneity related to acupuncture</b>               |                                   |
| Investigated                                                       | 12 (48%)                          |
| in subgroup analysis                                               | 5 (20%)                           |
| in sensitivity analysis                                            | 6 (24%)                           |
| in other analysis                                                  | 8 (32%)                           |
| Not investigated                                                   | 13(52%)                           |

\* Sum of the number of each control group may exceed the total number of included trials, since there are trials that have more than two control groups.

Q1-Q3: interquartile range 1 to 3

Table 2. Response of review authors for the reporting of acupuncture details in the Cochrane review

| N=25      | Q1       | Q2       | Q3       | Q4       |
|-----------|----------|----------|----------|----------|
| Yes       | 11 (44%) | 4 (16%)  | 0 (0%)   | 0 (0%)   |
| No        | 2 (8%)   | 5 (20%)  | 10 (40%) | 8 (32%)  |
| No answer | 12 (48%) | 16 (64%) | 15(60%)  | 17 (68%) |

Q1. Are you aware of any guideline or recommendation for reporting details of acupuncture treatment in journal publication?

Q2. Have you ever referred or used any reporting guidelines or recommendations when you reported the details of acupuncture treatments in your Cochrane review?

Q3. Have you ever received any guideline or recommendation for reporting details of acupuncture treatment from the Cochrane review group, when writing or updating your review?

Q4. Have you ever received any constraints or restrictions when reporting the details of acupuncture treatments in your Cochrane review?

Table 3. The number of component studies in Cochrane reviews and of original RCTs with reporting of selected STRICTA items

| Items                                   | Component studies<br>in Cochrane reviews |        | Original RCTs |        | *Difference (95% CI) |
|-----------------------------------------|------------------------------------------|--------|---------------|--------|----------------------|
|                                         | n/N                                      | (%)    | n/N           | %      |                      |
| <b>A. Acupuncture rationale</b>         |                                          |        |               |        |                      |
| 1. Style of acupuncture treatment       | 59/92                                    | (64.1) | 66/92         | (71.7) | 7.6 [1.1, 14.1]      |
| 2. Reasoning of treatment               | 6/92                                     | (6.5)  | 42/92         | (45.6) | 39.1 [28.1, 50.2]    |
| 3. Extent to which treatment was varied | 76/92                                    | (82.6) | 87/92         | (94.6) | 12.0 [4.2, 19.5]     |
| Total section A.                        |                                          |        |               |        |                      |
| <b>B. Needling details</b>              |                                          |        |               |        |                      |
| 1. Number of needles                    | 76/92                                    | (82.6) | 84/92         | (91.3) | 8.7 [1.9, 15.5]      |
| 2. Names of points                      | 74/92                                    | (80.4) | 84/92         | (91.3) | 10.9 [2.7, 19.0]     |
| 4. Depths of insertion                  | 36/92                                    | (39.1) | 41/92         | (44.6) | 5.4 [-7.1, 17.9]     |
| 5. Response to needle                   | 53/92                                    | (57.6) | 63/92         | (68.5) | 10.9 [0.0, 21.7]     |
| 6. Needle stimulation                   | 42/92                                    | (45.7) | 64/92         | (69.6) | 23.9 [13.6, 34.2]    |
| 8. Retention time                       | 69/92                                    | (75.0) | 81/92         | (88.0) | 13.0 [4.4, 21.6]     |
| 9. Needle type                          | 18/92                                    | (19.6) | 60/92         | (65.2) | 45.7 [34.4, 56.9]    |
| Total section B.                        |                                          |        |               |        |                      |
| <b>C. Treatment regimen</b>             |                                          |        |               |        |                      |
| 1. Number of sessions                   | 85/92                                    | (92.4) | 90/92         | (97.8) | 5.4 [-0.3, 11.2]     |
| 2. Frequency/Duration                   | 85/92                                    | (92.4) | 88/92         | (95.7) | 3.3 [-2.5, 9.1]      |
| Total Section C.                        |                                          |        |               |        |                      |
| <b>D. Treatment context</b>             |                                          |        |               |        |                      |
| 1. Details of other treatments          | 15/92                                    | (16.3) | 31/92         | (33.7) | 17.4 [8.6, 26.2]     |
| 2. Setting and context                  | 2/92                                     | (2.2)  | 19/92         | (20.7) | 18.5 [9.5, 27.5]     |
| Total Section D.                        |                                          |        |               |        |                      |
| <b>E. Practitioner background</b>       |                                          |        |               |        |                      |
| 1. Description of acupuncturists        | 56/92                                    | (60.9) | 51/92         | (55.4) | -5.4 [-15.2, -4.4]   |

Abbreviation; RCTs, randomized controlled trials

\*: Higher number means favorable results to RCTs.

1  
2  
3  
4  
5  
6  
7  
8  
9  
10  
11  
12  
13  
14  
15  
16  
17  
18  
19  
20  
21  
22  
23  
24  
25  
26  
27  
28  
29  
30  
31  
32  
33  
34  
35  
36  
37  
38  
39  
40  
41  
42  
43  
44  
45  
46  
47  
48  
49  
50  
51  
52  
53  
54  
55  
56  
57  
58  
59  
60

Figure 1. Flowchart of Cochrane reviews and component study selections  
CDSR; Cochrane database of systematic reviews

Figure 2. The number of reported items of STRICTA in Cochrane reviews of acupuncture and  
related RCTs

RCT; Randomized controlled trial

For peer review only

1  
2  
3 **Assessment of the quality of reporting for treatment components**  
4  
5  
6 **in Cochrane reviews of acupuncture**  
7  
8

9  
10 Kun Hyung Kim<sup>1</sup>, Jung Won Kang<sup>2</sup>, Myeong Soo Lee<sup>3</sup>, Jae Dong Lee<sup>2</sup>

11  
12 <sup>1</sup>*Division of Clinical Medicine, School of Korean Medicine, Pusan National University, Yangsan,*  
13  
14 *South Korea*

15  
16 <sup>2</sup>*Department of Acupuncture & Moxibustion, College of Oriental Medicine, Kyung Hee University,*  
17  
18 *Seoul, Republic of Korea*

19  
20 <sup>3</sup>*Medical Research Division, Korea Institute of Oriental Medicine, Daejeon, South Korea*  
21

22  
23 **Running Title:** STRICTA for Cochrane reviews of acupuncture  
24

25  
26 **Source of support:** This work was supported by the Korea Institute of Oriental Medicine  
27  
28 (K10101).  
29

30 **Financial Disclosure:** None

31 **Keywords:** acupuncture, Cochrane review, systematic review, STRICTA, CONSORT,  
32  
33 reporting guideline  
34  
35

36  
37  
38 **Corresponding author :**

39 Jae Dong Lee, KMD., PhD.

40 Department of Acupuncture & Moxibustion, College of Korean Medicine

41 Kyung Hee University,

42 Seoul, 130-872, South Korea

43 Tel : 82-(0) 2-958-9207

44 Fax: 82-(0) 2-958-9211

45 E-mail:ljdacu@gmail.com  
46  
47  
48  
49  
50  
51  
52  
53  
54  
55  
56  
57  
58  
59  
60

**Abstract**

**Objectives:** High quality reporting of treatment details can aid replication of study results in real-world clinical practice. The Standards for Reporting Interventions in Clinical Trials of Acupuncture (STRICTA) is a reporting guideline for key elements of acupuncture interventions in clinical trials. This study used STRICTA to investigate whether Cochrane reviews of acupuncture adequately report important treatment details.

**Design:** Systematic review

**Methods:** Cochrane reviews of acupuncture were identified from *The Cochrane Library* (Issue 7, 2012). Randomized controlled trials (RCTs) included in the reviews and published after 2005 were obtained. Using STRICTA, we extracted acupuncture-related information from both the Cochrane reviews and the RCTs. The Characteristics of included studies table was the major source of intervention information from Cochrane reviews. Reporting quality of acupuncture interventions in Cochrane reviews was assessed and compared to the respective RCTs.

**Results:** 25 Cochrane reviews of acupuncture and 92 RCTs met the selection criteria. Cochrane reviews were 16% less likely to report the acupuncture-related items of STRICTA than RCTs (risk ratio 0.84, 95% confidence interval 0.79 to 0.88,  $I^2=8\%$ ). Information was significantly better reported for 10 of the 15 treatment-group items of STRICTA in RCTs than in Cochrane reviews ( $p<0.05$ ), while four items did so without statistical significance. One item related to practitioner background was significantly better reported in Cochrane reviews.

**Conclusion:** Reporting quality of treatment details in Cochrane reviews of acupuncture was insufficient with regard to STRICTA, even though such information was readily reported in RCTs. The overall quality of reporting of the RCTs, while better than the reviews, was also often suboptimal. Use of STRICTA guideline during the review process is recommended to adequately report the key treatment components in Cochrane reviews of acupuncture. The

1  
2  
3 potential impact of STRICTA to the replicability and utilization of reviews in future research  
4  
5 and practice needs to be investigated.  
6  
7  
8

9  
10 **Strengths and limitations of this study**

- 11  
12 • This study is the first investigation that revealed the avoidable incompleteness of  
13 reporting quality with regard to important treatment components of acupuncture in the  
14 Cochrane reviews, even though information was readily reported in relevant primary  
15 RCTs.  
16  
17  
18  
19  
20  
21 • Our findings suggest there is a loss of treatment-related information during data  
22 abstraction for Cochrane reviews which may influence the replicability of trial  
23 interventions.  
24  
25  
26  
27  
28 • Whether loss of treatment-related information actually leads to the altered  
29 replicability of reported interventions in Cochrane reviews was not investigated.  
30  
31  
32  
33  
34  
35  
36  
37  
38  
39  
40  
41  
42  
43  
44  
45  
46  
47  
48  
49  
50  
51  
52  
53  
54  
55  
56  
57  
58  
59  
60

## Background

Cochrane systematic reviews have summaries of study characteristics, which aim to include details of study interventions to be replicated in practice.<sup>1</sup> Developing methods to improve the descriptions of complex interventions are considered as essential task to complement existing systematic review methodology.<sup>2</sup> Therefore, adherence to international standards for reporting interventions might be helpful for detailed description of study interventions in Characteristics summaries in Cochrane systematic reviews. The Standards for Reporting Interventions in Clinical Trials of Acupuncture (STRICTA) is an internationally recommended standard for reporting details of acupuncture interventions in clinical trials of acupuncture. It can be used to provide sufficient information for researchers or clinicians to understand acupuncture interventions used in the study and replicate them in other researches or practices.<sup>3</sup> Consolidated Standards of Reporting Trials (CONSORT) for non-pharmacological treatments has also suggested to provide detailed information for study interventions thus to improve the uptake of study results in studies of complex interventions, including surgery, psychological interventions and acupuncture.<sup>4</sup> However, many current trials and reviews have been found to often omit crucial details of non-pharmacological treatments.<sup>5</sup> In case of Cochrane reviews, clear description on the intervention of interests has been emphasized to improve applicability of review into real clinical practice.<sup>6</sup> To the best of our knowledge, however, there is no study assessing whether Cochrane reviews provide satisfactory description on any particular intervention by adopting standards for reporting interventions. Although previous researches focused on managing the reporting quality of Cochrane review in terms of methodological process,<sup>7</sup> the reporting quality for interventions in Cochrane review had been largely ignored. Hence, this study aimed to assess the reporting quality of acupuncture treatment-related information in the Cochrane reviews of acupuncture, as well as to investigate whether utilization of the reporting guideline for treatment



1  
2  
3 intervention can improve the quality of reporting in Cochrane reviews of acupuncture.  
4  
5  
6  
7  
8  
9  
10  
11  
12  
13  
14  
15  
16  
17  
18  
19  
20  
21  
22  
23  
24  
25  
26  
27  
28  
29  
30  
31  
32  
33  
34  
35  
36  
37  
38  
39  
40  
41  
42  
43  
44  
45  
46  
47  
48  
49  
50  
51  
52  
53  
54  
55  
56  
57  
58  
59  
60

For peer review only

## Methods

### Search strategy and selection criteria for Cochrane reviews of acupuncture

Cochrane Database of Systematic Reviews (CDSR) of Issue 7, March 2012 were searched to identify Cochrane reviews of acupuncture using the term “acupuncture”. Cochrane reviews that investigated acupuncture as a primary treatment intervention or as one of various treatment or control interventions with at least one primary component study that assessed the effects of acupuncture were included. Reviews without any included study (i.e., empty reviews) or reviews that did not include acupuncture-related studies were excluded.

### Search strategy and selection criteria for component studies in eligible Cochrane reviews of acupuncture

Component study was defined as a study included in the Cochrane review regardless of the contribution to the qualitative or quantitative analyses. These were searched using the reference citation information provided in the relevant Cochrane reviews. Among studies in eligible Cochrane systematic reviews, only trials published since 2005 were considered to be analyzed in this study. This is because of the possible necessary time-span for uptake of STRICTA guideline. This approach is similar to the work of Prady et al. (2008) which analyzed acupuncture studies published after 3 to 4 years following the publication of STRICTA.<sup>8</sup> Component studies which involved the assessment of acupuncture as a treatment or control intervention were eligible in our study. The term “acupuncture” was defined as interventions involving penetration of certain points on the skin by needling regardless of manual or electrical stimulation, since the needling is believed to be the most representative feature of acupuncture and STRICTA items were originally developed for the reporting of needle acupuncture in clinical studies.<sup>3</sup> Thus, component studies using other types of non-penetrating stimulation on acupuncture points, such as laser acupuncture, acupressure,

1  
2  
3 device-involved acupuncture point stimulation (i.e., wrist band application) and injections on  
4  
5 acupuncture points were excluded. Studies employing stimulation on non-classical  
6  
7 acupuncture points, such as trigger points, were eligible only if they clearly mentioned the  
8  
9 intervention was “acupuncture” in the review.  
10

### 14 **Data extraction in Cochrane reviews of acupuncture**

16 Intervention details for acupuncture treatments in tables for characteristics of included  
17  
18 component studies were extracted in each Cochrane review. Characteristics of included  
19  
20 component studies were chosen for the main data source of our analysis because they intend  
21  
22 to provide sufficient information on various study components including details of  
23  
24 interventions to enable readers to understand the study better or replicate interventions in  
25  
26 their own contexts.<sup>1</sup> Methods and results of the included Cochrane reviews were also  
27  
28 examined to identify further acupuncture-related information which was not reported in the  
29  
30 tables. Two independent authors underwent these processes.  
31  
32

34 General characteristics of each component study, including publication languages (English or  
35  
36 non-English), type of control groups in primary component studies, publication or last-  
37  
38 updated years and number of included studies in the Cochrane reviews were extracted.  
39  
40 Whether clinical heterogeneity related to the acupuncture treatments were planned to be  
41  
42 investigated by subgroup, sensitivity or other analysis regardless of the availability of those  
43  
44 analyses were also identified. One review author conducted these processes.  
45  
46  
47  
48

### 50 **Data extraction in component studies**

52 For included studies to be analyzed, full-texts were obtained to check whether there is any  
53  
54 difference of reported information for acupuncture treatments in terms of STRICTA items  
55  
56 between the primary component studies and the Cochrane review. This was done to identify  
57  
58  
59  
60

1  
2  
3 any selective omission of treatment-related information by the Cochrane review author.  
4  
5 Published protocols or supplements of included studies for more detail information were  
6  
7 further sought when the primary component studies had relevant information for tracking  
8  
9 such data (i.e., citation information in the reference or web-appendix provided by the  
10  
11 component study).  
12

### 13 14 15 16 **Selection of STRICTA items for data extraction**

17  
18 Acupuncture-related items of STRICTA were used to assess the quality of reporting for  
19  
20 acupuncture treatment-related information in Cochrane reviews of acupuncture. Items with  
21  
22 regard to the description of the comparison interventions were not used, because the main  
23  
24 interest of this review was to assess the completeness of description of the acupuncture  
25  
26 treatment itself. The revised STRICTA checklist published in 2010 served as a primary  
27  
28 source of extraction form of acupuncture-related information.<sup>3</sup>  
29  
30  
31  
32  
33

### 34 **Rating methods of items in STRICTA**

35  
36 Each item of STRICTA was rated with a dichotomous scale (i.e., “reported” or “not  
37  
38 reported”). The rating of “reported” was given when relevant information is at least partially  
39  
40 reported in the Cochrane review or primary component studies. The rating of “not reported”  
41  
42 was given when relevant information is completely lacked in the Cochrane reviews or  
43  
44 primary component studies. When there is written evidence in the Cochrane review that the  
45  
46 review authors attempted to report and sought the relevant information but could not find it in  
47  
48 the component study, the item was rated as successfully reported one in the Cochrane review.  
49  
50 Our approach is in line with the Preferred Reporting Items for Systematic Reviews and Meta-  
51  
52 Analyses (PRISMA) statements that stressed the importance of reporting all variables for  
53  
54 which data were sought, regardless of its availability in the component studies.<sup>7</sup> STRICTA  
55  
56  
57  
58  
59  
60

1  
2  
3 recommends reporting of actually performed acupuncture intervention, rather than reporting  
4 of treatment protocols without any evidence of implementation. However, we assumed the  
5 reporting of Cochrane reviews or of component studies as performed, because distinctions  
6 were not clear in most cases.  
7  
8  
9  
10

### 11 12 13 14 **Inquiries to the review authors and review groups**

15  
16 One author (KKH) visited websites of relevant Cochrane review groups (CRGs) to see  
17 whether any reporting guidelines for acupuncture-related intervention were provided for  
18 review authors. (accessed at 12<sup>th</sup> July 2012) E-mail queries were sent to the contact point of  
19 CRGs. Two questions were used for the survey, as follows: “Do your CRG have a policy or  
20 specific recommendations about the reporting details of acupuncture interventions for review  
21 authors? If any, please specify” and “Have you ever recommended any specific guideline for  
22 reporting details of acupuncture interventions for the review to review authors? If any, please  
23 specify”, respectively. Similar e-mail queries with four questions were sent to the  
24 correspondence of the included Cochrane reviews (Table 2). This was done to check if CRGs  
25 or review authors had been aware the existence of reporting guidelines of acupuncture (i.e.,  
26 STRICTA), had or had been recommended to use reporting guidelines for detailed  
27 description of interventions regarding acupuncture.  
28  
29  
30  
31  
32  
33  
34  
35  
36  
37  
38  
39  
40  
41  
42  
43  
44

### 45 **Training of trial assessors**

46  
47 Two reviewers (KHK and JWK), both experienced acupuncture researchers and systematic  
48 reviewers, received training on STRICTA assessment checklists. The training course aimed to  
49 minimize inconsistency in data extraction and scoring. Ten trials in the Cochrane reviews that  
50 were published before 2005 thus excluded in our analyses were randomly selected for initial  
51 scoring by both reviewers. Two reviewers independently assessed and scored the quality of  
52  
53  
54  
55  
56  
57  
58  
59  
60

1  
2  
3 reporting in terms of acupuncture treatment-related information of ten component trials in the  
4  
5 Cochrane reviews. Following this, we attempted to develop and re-assure the standardized  
6  
7 scoring instruction for the main analysis.  
8  
9

### 10 11 **Statistical analysis**

12  
13  
14 The number of items rated as “reported” in the Cochrane review was compared with those in  
15  
16 the relevant primary component studies. Results were presented as risk ratios (RR) with 95%  
17  
18 confidence intervals (CI). Random effects model was used, and heterogeneity was analysed  
19  
20 using a Chi<sup>2</sup> test on N-1 degrees of freedom, with an alpha of 0.05 used for statistical  
21  
22 significance and with the I<sup>2</sup> statistic. The number and proportion of component studies in the  
23  
24 Cochrane reviews and the original RCTs that reported information for each STRICTA item  
25  
26 was compared using the McNemar test as percentage reported with binomial 95% confidence  
27  
28 intervals. STATA version 10.0 (Stata-Corp, College Station, Texas) and RevMan 5.2 (The  
29  
30 Nordic Cochrane Centre, Copenhagen) was used for statistical analyses and the forest plot,  
31  
32 respectively.  
33  
34  
35  
36  
37  
38  
39  
40  
41  
42  
43  
44  
45  
46  
47  
48  
49  
50  
51  
52  
53  
54  
55  
56  
57  
58  
59  
60

## Results

Totally 74 Cochrane reviews were identified following the search of CDSR, of which 26 reviews with 96 component studies were deemed to be eligible. Among them, one review and four component studies were excluded from the analysis, because of the wrong citation (n=3) and no accessibility (n=1) of component studies that resulted in the analysis of 25 reviews and 92 component studies. (Figure 1)

### Study characteristics

Of the 25 included Cochrane reviews of acupuncture, 17 reviews (68%) evaluated acupuncture as a primary intervention of interest. The median value of publication year or year that last update were performed was 2010. 12 reviews (48%) attempted to investigate the clinical heterogeneity related to acupuncture treatment by the means of subgroup, sensitivity or other type of analysis (i.e., acupuncture adequacy test).

Of the 92 component studies, 58 studies (63%) were published in English. The median value of publication year of component studies published after 2005 was 2007. Type of comparison to acupuncture was non-acupuncture interventions (n=68, 74%), sham acupuncture (n=34, 37%) and active acupuncture treatments (n=14, 15%). Details of characteristics for Cochrane acupuncture reviews and component studies are provided in Table 1.

### Review policy or recommendations for the reporting acupuncture intervention

No CRG policy or recommendations given to the review author for reporting of acupuncture treatment were identified by an e-mail survey to the CRG correspondence or review authors. Five of 16 CRGs replied that the Cochrane Handbook should serve as a general standard guideline for reporting in the review, although no detailed instructions or any recommendations for reporting the details or at least core components of complex

1  
2  
3 interventions such as acupuncture were provided to authors. One CRG of the Cochrane  
4  
5 review that did not evaluate acupuncture as primary intervention reported that they sought the  
6  
7 feedback from an acupuncture specialist during editorial process. Less than half of reviewers  
8  
9 (44%) reported that they were aware of STRICTA and only 16% of reviewers had utilized  
10  
11 STRICTA during the review process. Reviewers did not receive either recommendation or  
12  
13 restriction in terms of reporting acupuncture treatment during their review process (Table 2).  
14  
15

### 16 17 18 **STRICTA reporting in the Cochrane reviews and in the component studies** 19

20  
21 Risk ratio of the reporting rate of STRICTA items was 0.84 (95% confidence interval 0.79 to  
22  
23 0.88,  $I^2=8%$ ), indicating that Cochrane reviews were 16% less likely to report the  
24  
25 acupuncture-related items of STRICTA than component RCTs (Figure 2). Information was  
26  
27 significantly better reported for 10 of the 15 acupuncture treatment-related items of STRICTA  
28  
29 in RCTs than in Cochrane reviews ( $p<0.05$ ), while four items did so without statistical  
30  
31 significance (Table 3). The most significant difference of reporting rate was found for the  
32  
33 item A2 (reasoning of treatment) and B9 (needle type) with better reporting in 39.1 % and  
34  
35 45.7 % of RCTs, respectively. One item (E1) related to practitioner background was  
36  
37 significantly better reported in Cochrane reviews. Four items including A2 (reasoning of  
38  
39 treatment), B4 (depth of insertion), D1 (details of other treatments) and D2 (setting and  
40  
41 context) were reported in less than half of component studies in the Cochrane reviews and of  
42  
43 RCTs.  
44  
45  
46  
47  
48  
49  
50  
51  
52  
53  
54  
55  
56  
57  
58  
59  
60



## Discussion

This study is the first systematic investigation of selective reporting in terms of details of interventions in the Cochrane reviews of acupuncture. We found some items which have been regarded as core components of acupuncture treatments were not reported in the Cochrane review, even though those information was already reported in the component RCTs. Details of interventions were significantly better reported in the RCTs in most items of STRICTA. This was achieved without further contact of authors of RCTs, which might imply the improvement of the reporting quality in terms of intervention details could be achieved directly by adopting STRICTA as a guideline for data abstraction by reviewers, editorials and peer-reviewers. However, no specific recommendation or guidelines for review authors were provided by CRG, and only minor portion of review authors or members of CRGs were identified to be aware of the existing CONSORT extension version of acupuncture. Overall, there is an insufficient reporting of acupuncture details which could have been improved if the existing reporting guidelines were well utilized in the review process.

In our review, less reporting of treatment-related information in the Cochrane reviews was observed in most of selected STRICTA items. To some extent, missing details of complex intervention might be inevitable during abstraction of information due to the complexity in practice.<sup>5</sup> However, some items showed almost compatible or even better reporting quality in the Cochrane reviews than in the RCTs. For example, information regarding the practitioner qualification was relatively well-reported (over 60% of component studies). Some of mechanical aspects of acupuncture treatments were also relatively well-reported both in Cochrane reviews and primary component studies, although some showed modest reporting quality both in Cochrane reviews and RCTs. Item B9 (Needle type) showed the most difference (45.7% difference) of reporting rates between Cochrane reviews and primary

1  
2  
3 component studies. This is in line with the previous research that common missing element of  
4  
5 non-pharmacological interventions in randomized controlled trials were materials necessary  
6  
7 to provide the intervention (51%) and details about intervention-related procedures (46%)  
8  
9 published in six major general medical journals.<sup>10</sup> On the contrary, poor reporting of  
10  
11 contextual factors (D1; details of other treatments, D2; setting and context, D3; Patient-  
12  
13 practitioner interaction) was obvious both in Cochrane reviews and primary component  
14  
15 studies. Although treatment context can have a significant influence on treatment effects,<sup>11</sup>  
16  
17 reporting information related to study contexts and patient-practitioner interactions seems to  
18  
19 have been largely ignored by researchers of complex intervention.<sup>12</sup> Since acupuncture is a  
20  
21 practitioner-dependent, non-pharmacological complex intervention,<sup>13</sup> sufficient details of  
22  
23 intervention delivered and study contexts might be of particular importance to enable readers  
24  
25 to consider the application and reproduction of review results in different treatment settings.<sup>12</sup>  
26  
27  
28  
29 Items that explain theoretical background of acupuncture intervention were also largely  
30  
31 underreported in Cochrane reviews of acupuncture, although theoretically-derived therapeutic  
32  
33 actions or strategies in complex interventions such as acupuncture may also have an  
34  
35 important role in constituting overall therapeutic effects.<sup>13</sup> It is still unclear for acupuncture  
36  
37 which component exerts therapeutic effects which combination of potential therapeutic  
38  
39 components works best, or whether combination of several components during the  
40  
41 acupuncture treatment is additive or synergistic.<sup>14</sup> Therefore, it would be a reasonable  
42  
43 suggestion for reviewers to report component factors of acupuncture that seems potentially  
44  
45 contributable to the effectiveness which are well-represented in STRICTA, until future  
46  
47 researches elucidate the therapeutic role of each component or group of components in the  
48  
49 acupuncture treatment.  
50  
51  
52  
53  
54  
55  
56  
57  
58  
59  
60

1  
2  
3 One possible explanation of inconsistent and suboptimal reporting of acupuncture treatment-  
4 related information would be that the Cochrane reviewers might not perceive some items of  
5 STRICTA as relevant to their review and selectively depicted some items of STRICTA. In a  
6  
7  
8  
9  
10 small survey of Prady et al., some trialists and Cochrane review authors did not perceive  
11 some items of the previous version of STRICTA as relevant to acupuncture treatments.<sup>15</sup>

12  
13  
14 Another reason might be a lack of standard reporting guideline for interventions in the  
15  
16  
17  
18  
19  
20  
21  
22  
23  
24  
25  
26  
27  
28  
29  
30  
31  
32  
33  
34  
35  
36  
37  
38  
39  
40  
41  
42  
43  
44  
45  
46  
47  
48  
49  
50  
51  
52  
53  
54  
55  
56  
57  
58  
59  
60  
Another reason might be a lack of standard reporting guideline for interventions in the  
Cochrane review. Either Cochrane review authors or CRG correspondence reported that they  
did not know the existence of reporting guidelines for acupuncture. To date, however, there is  
no study investigating reasons for the selective reporting intervention-related information  
(including acupuncture) in Cochrane reviews. Since information related to the treatment  
intervention is essential to enhance the external validity, applicability and implementation of  
results of systematic review,<sup>5</sup> barriers to the optimal quality of reporting for treatment  
intervention should be explored and tackled in future studies.

34  
35  
36  
37  
38  
39  
40  
41  
42  
43  
44  
45  
46  
47  
48  
49  
50  
51  
52  
53  
54  
55  
56  
57  
58  
59  
60  
Removal of STRICTA-specific information in the reporting due to the journal's space  
constraints or suggestions of editors as well as peer-reviewers was addressed by some trial  
authors.<sup>15</sup> This may be the case for the systematic review published in non-Cochrane medical  
journals which have limited word counts.<sup>15</sup> In our research, the possibility of potential  
influence of space constraints on suboptimal reporting seems unlikely because Cochrane  
review allows review authors to describe the main characteristics of each included study  
without any space constraints. However, lack of comparison of the reporting quality of  
acupuncture intervention in Cochrane reviews with those in non-Cochrane reviews published  
in journals with space-constraints do not provide evidence to support this argument. Future  
research incorporating both Cochrane and non-Cochrane reviews may reveal whether there is  
any systematic differences of reporting quality in terms of the details of treatment

1  
2  
3 intervention between Cochrane and non-Cochrane reviews, thus space-constraints could be  
4  
5 an influencing factor to the reporting quality of intervention-related information or not.  
6  
7

8  
9  
10 Evaluation of internal validity has been put on great emphasis in the Cochrane systematic  
11  
12 reviews.<sup>9,16</sup> However, evaluating applicability of review results may also be of similar  
13  
14 importance, since uptake and reproduction of review results may be able to change the  
15  
16 routine clinical practice toward evidence-based practice.<sup>5</sup> Lack of consideration of external  
17  
18 validity is a major criticism of systematic reviews and RCTs, and is a potential threat of poor  
19  
20 uptake of evidence into routine clinical practice.<sup>17-20</sup> Intervention details and treatment  
21  
22 contexts which STRICTA aims to address are suggested as the determinants of external  
23  
24 validity in trial, systematic review and guideline publications,<sup>12, 23</sup> although little is known  
25  
26 whether detailed description of acupuncture interventions in systematic reviews can affect  
27  
28 uptake of evidence in practice. Whether selective reporting of acupuncture interventions  
29  
30 observed in our study would influence the uptake of evidence may deserve further research.  
31  
32  
33  
34  
35

### 36 **Strengths and weakness**

37  
38 STRICTA is the best representative recommendation agreed by international acupuncture  
39  
40 experts, constituting core components of acupuncture treatment that may be inter-related.<sup>3</sup>  
41  
42 However, STRICTA had not been developed to measure the quality of reporting acupuncture  
43  
44 interventions, although we summed the scores of each items to score the overall quality of  
45  
46 reporting acupuncture interventions. Since this method is not based on the original purpose of  
47  
48 STRICTA and there is no weighting criteria for each items, interpretations of our results  
49  
50 should be cautious.<sup>8</sup> The scores should not be understood as the exact quantitative estimates  
51  
52 across the studies, but as possible indicators of incompleteness of reporting details of  
53  
54 acupuncture.  
55  
56  
57  
58  
59  
60

1  
2  
3  
4  
5 Results of rating might be prone to subjective assessment, although extensive training of  
6  
7 authors using CONSORT elaboration document <sup>3</sup> were preceded. Two assessors were  
8  
9 unblinded to the study characteristics, such as publication dates or allocation of acupuncture  
10  
11 as a primary or control intervention. Since both assessors are acupuncture researchers as well  
12  
13 as practitioners thus may be familiar with included acupuncture studies, we did not attempt to  
14  
15 blind the assessors. Prady et al. found that unblinded assessor gave higher scores to some of  
16  
17 acupuncture studies in terms of items of STRICTA, although this tendency was not consistent  
18  
19 in the rest of studies to be assessed.<sup>8</sup> Nevertheless, unblinded assessors with prior knowledge  
20  
21 of study characteristics in our review may have introduced bias.  
22  
23  
24  
25  
26

27 The first STRCITA was published in 2001, and as a revised version in 2010. We adopted the  
28  
29 revised version of STRICTA for studies which had been published both before and after it.  
30  
31 Thus, component studies published before the publication of revised STRICTA may not  
32  
33 address the some revised items assessed in this review. This may have yielded a systematic  
34  
35 bias when assessing the component studies by disadvantaging articles following a previous  
36  
37 version of the guideline.<sup>8</sup> Nevertheless, the utilization of the latest version of STRICTA was  
38  
39 justified in our study with three reasons: First, the CONSORT initiatives recommended the  
40  
41 use of most recently released version of reporting standards when reporting and analyzing  
42  
43 RCTs.<sup>21</sup> Second, the ultimate aim of using STRCITA in this study was not to score  
44  
45 component studies per each item, but to reflect whether and how Cochrane reviews report or  
46  
47 omit essential component of acupuncture treatments which were deemed the best  
48  
49 representation of consensus across international acupuncture experts. Third, we identified that  
50  
51 selected components for this review in the original STRICTA and in the revised one is almost  
52  
53  
54  
55  
56  
57  
58  
59  
60

1  
2  
3 consistent enough to justify the use of the latest version of STRICTA. In this sense, the latest  
4  
5 version of STRICTA was preferred.  
6  
7

8  
9  
10 Uptake of reporting guidelines by individual researchers and journal editors may take longer  
11  
12 than expected. A survey of author instructions conducted in 2007 revealed that only 38% of  
13  
14 165 high-impact journals endorsed the CONSORT statement, which was initially published in  
15  
16 1996.<sup>22</sup> The median values of the publication years of the primary component studies and  
17  
18 Cochrane reviews used in this study were 2007 and 2010, respectively. The first STRICTA  
19  
20 statement was published in 2001, and insufficient time may have elapsed to justify our  
21  
22 research. This should be recognized as a weakness of our study, and future follow-up studies  
23  
24 may overcome this issue.  
25  
26

27  
28  
29 We did not contact authors of the primary component studies to gain additional information  
30  
31 with regard to the under-reported items of STRICTA. This was because our primary interest  
32  
33 is to identify selective reporting / omissions of acupuncture-related information during the  
34  
35 review process in the Cochrane reviews. Given the authors of primary component studies are  
36  
37 often contacted to gain additional information when conducting systematic review, however,  
38  
39 our study might not reflect common information-seeking procedure during review process.  
40  
41 Author contact would have brought to what extent Cochrane reviews could have  
42  
43 comprehensively described the treatment-related information of acupuncture based on the  
44  
45 standard author query process recommended in the Cochrane handbook.<sup>23</sup> Future follow-up  
46  
47 study may address such limitation.  
48  
49  
50

#### 51 52 53 54 **Implication for future research** 55 56 57

1  
2  
3 Factors associated with how and why review authors selectively summarize the treatment  
4 intervention during the review process should be investigated to identify the potential barrier  
5 of optimal quality of reporting in Cochrane reviews of acupuncture. Recent empirical  
6 evidence supports that the utilization of reporting guideline (i.e., CONSORT, STROBE,  
7 TREND and STARD) with regard to general methodological issues during peer review  
8 processes improves the quality of publication in biomedical journals.<sup>24</sup> Whether and how  
9 reporting guidelines for the description of treatment intervention such as STRICTA can be  
10 efficiently utilized during editorial and peer-review process and provided as author-support  
11 resources in CRG websites should be explored to improve the reporting quality of treatment  
12 intervention. Whether and how reporting items of STRICTA explaining theoretical  
13 background, mechanical aspects and contextual factors of acupuncture could contribute to the  
14 investigation of clinical heterogeneity of acupuncture treatments and their potential impacts  
15 on the direction and significance of effect estimates should also be explored. Whether loss of  
16 treatment-related information actually leads to an altered replicability of reported  
17 interventions in Cochrane reviews was not investigated in this study, and should also be  
18 investigated in future research.

## 40 **Conclusions**

41  
42 The reporting quality of treatment details in Cochrane reviews of acupuncture was  
43 insufficient with regard to STRICTA recommendation, even though information was readily  
44 reported in primary component studies. STRICTA was rarely utilized by CRGs and review  
45 authors. Use of STRICTA guideline for the reporting treatment details in Cochrane reviews  
46 and peer-review process should be considered to improve the replicability and utilization of  
47 review results in future research and clinical practice.

## References

1. Schunemman HJ, Oxman AD, Higgins JPT, Vist GE, Glasziou P, Guyatt GH. Chapter 11: Presenting results and 'Summary of findings' table. In: Higgins JPT, Green S (editors). *Cochrane Handbook for Systematic Reviews of Interventions*. Chichester (UK): John Wiley & Sons, 2008.
2. Shepperd S, Lewin S, Straus S, *et al*. Can we systematically review studies that evaluate complex interventions? *PLoS Med* 2009;6: e1000086.doi: 10.1371/journal.pmed.1000086.
3. MacPherson H, Altman DG, Hammerschlag R, *et al*. Revised STAndards for Reporting Interventions in Clinical Trials of Acupuncture (STRICTA): extending the CONSORT statement. *PLoS Med*. 2010;7: e1000261.doi: 10.1371/journal.pmed.1000261.
4. Boutron I, Moher D, Altman DG, *et al*. Extending the CONSORT statement to randomized trials of nonpharmacologic treatment: explanation and elaboration. *Ann Intern Med* 2008;148:295-309.
5. Glasziou P, Meats E, Heneghan C, Shepperd S. What is missing from descriptions of treatment in trials and reviews? *BMJ* 2008;336:1472-4.
6. Schunemman HJ, Oxman AD, Vist GE, Higgins JPT, Deeks JJ, Glasziou P, Guyatt GH. Chapter 12: Interpreting results and drawing conclusions. In: Higgins JPT, Green S (editors). *Cochrane Handbook for Systematic Reviews of Interventions*. Chichester (UK): John Wiley & Sons, 2008.
7. Liberati A, Altman DG, Tetzlaff J, *et al*. The PRISMA statement for reporting systematic reviews and meta-analyses of studies that evaluate healthcare interventions: explanation and elaboration. *BMJ* 2009;339: doi: 10.1136/bmj.b2700.doi: 10.1136/bmj.b2700.
8. Prady SL, Richmond SJ, Morton VM, Macpherson H. A systematic evaluation of the impact of STRICTA and CONSORT recommendations on quality of reporting for acupuncture trials. *PLoS One* 2008;3: e1577.doi: 10.1371/journal.pone.0001577.
9. Ahmad N, Boutron I, Dechartres A,*et al*. Applicability and generalisability of the results of systematic reviews to public health practice and policy: a systematic review. *Trials* 2010;11:20.doi: 10.1186/1745-6215-11-20.
10. Hoffman T, Glasziou P, Eructi C. Poor description of non-drug interventions: a remediable barrier to usage of evidence in practice? (P132). Abstracts of the 20th Cochrane Colloquium, 30 September



- 1  
2  
3 - 3 October 2012, Auckland, New Zealand Cochrane Database of Systematic Reviews, Supplement  
4  
5 2012: Art No. CD201200. doi:101002/14651858CD201200. 2012.  
6  
7 11. Kaptchuk TJ, Kelley JM, Conboy LA, *et al.* Components of placebo effect: randomised controlled  
8  
9 trial in patients with irritable bowel syndrome. *BMJ* 2008;336:999-1003.  
10  
11 12. Wells M, Williams B, Treweek S, *et al.* Intervention description is not enough: evidence from an  
12  
13 in-depth multiple case study on the untold role and impact of context in randomised controlled trials  
14  
15 of seven complex interventions. *Trials* 2012;13:95. doi: 10.1186/1745-6215-13-95.  
16  
17 13. Paterson C, Dieppe P. Characteristic and incidental (placebo) effects in complex interventions such  
18  
19 as acupuncture. *BMJ* 2005;330:1202-5.  
20  
21 14. Macpherson H, Tilbrook H, Bland MJ, *et al.* Acupuncture for irritable bowel syndrome: primary  
22  
23 care based pragmatic randomised controlled trial. *BMC Gastroenterol*  
24  
25 2012;12:150. doi:10.1186/1471-230X-12-150.  
26  
27 15. Prady SL, Macpherson H. Assessing the utility of the standards for reporting trials of acupuncture  
28  
29 (STRICTA): a survey of authors. *J Altern Complement Med* 2007;13(9):939-43.  
30  
31 16. Higgins JPT, Altman DG (editors). Chapter 8: Assessing risk of bias in included studies. In:  
32  
33 Higgins JPT, Green S (editors). *Cochrane Handbook for Systematic Reviews of Interventions*.  
34  
35 Chichester (UK): John Wiley & Sons, 2008.  
36  
37 17. Eldridge S, Ashby D, Bennett C, *et al.* Internal and external validity of cluster randomised trials:  
38  
39 systematic review of recent trials. *BMJ* 2008;336:876-80.  
40  
41 18. Ethgen M, Boutron L, Steg PG, *et al.* Quality of reporting internal and external validity data from  
42  
43 randomized controlled trials evaluating stents for percutaneous coronary intervention. *BMC Med*  
44  
45 *Res Methodol* 2009;9:24. doi: 10.1186/1471-2288-9-24.  
46  
47 19. Rothwell PM. Assessment of the external validity of randomised controlled trials. In: Rothwell PM,  
48  
49 editor. *Treating individuals: From randomised trials to personalised medicine*. Spain: Elsevier; 2007.  
50  
51 p. 61-82.  
52  
53 20. Purepong N, Jitvimonrat A, Sitthipornvorakul E, *et al.* External validity in randomised controlled  
54  
55 trials of acupuncture for osteoarthritis knee pain. *Acupunct Med* 2012;30:187-94.  
56  
57  
58  
59  
60

1  
2  
3 21.<http://www.consort-statement.org/>. [Assessed 9th Sep, 2013].  
4

5 22. Hopewell S, Altman DG, Moher D, Schulz KF. Endorsement of the CONSORT Statement by high  
6  
7 impact factor medical journals: a survey of journal editors and journal 'Instructions to Authors'.  
8  
9 *Trials* 2008;9:20.doi: 10.1186/1745-6215-9-20.  
10

11 23.Higgins JPT, DeeksJJ (editors). Chapter7: Selecting studies and collecting data. In: Higgins JPT,  
12  
13 Green S (editors). *Cochrane Handbook for Systematic Reviews of Interventions*. Chichester (UK):  
14  
15 John Wiley & Sons, 2008.  
16

17 24.Cobo E, Cortés J, Ribera JM, *et al*. Effect of using reporting guidelines during peer review on  
18  
19 quality of final manuscripts submitted to a biomedical journal: masked randomised trial.  
20  
21 *BMJ*2011;343:d6783.doi: 10.1136/bmj.d6783.  
22  
23  
24  
25  
26  
27  
28  
29  
30  
31  
32  
33  
34  
35  
36  
37  
38  
39  
40  
41  
42  
43  
44  
45  
46  
47  
48  
49  
50  
51  
52  
53  
54  
55  
56  
57  
58  
59  
60

Table 1. General characteristics of Cochrane reviews related to acupuncture

|                                                                    | Included Cochrane reviews<br>N=25 |
|--------------------------------------------------------------------|-----------------------------------|
| <b>Number of Cochrane reviews, N(%)</b>                            |                                   |
| Acupuncture as primary                                             | 17                                |
| Acupuncture as secondary                                           | 8                                 |
| <b>Number of component study</b>                                   |                                   |
| Total                                                              | 409                               |
| Mean                                                               | 16.36 (11.77)                     |
| Median (Q1-Q3)                                                     | 13 (3 – 47)                       |
| <b>Number of component study published after 2005</b>              |                                   |
| Total                                                              | 92                                |
| Mean                                                               | 3.7 (3.85)                        |
| Median (Q1-Q3)                                                     | 2 (1 – 5)                         |
| <b>Publication language of component studies after 2005, N (%)</b> |                                   |
| Total                                                              | 92                                |
| English                                                            | 58 (63%)                          |
| Languages other than English                                       | 34 (37%)                          |
| <b>Number of component studies published in</b>                    |                                   |
| Acupuncture-related journal                                        | 47                                |
| Western medicine journal                                           | 43                                |
| <b>Publication year</b>                                            |                                   |
| Cochrane review (Q1-Q3)                                            | 2010 (2008-2011)                  |
| Component studies (Q1-Q3)                                          | 2007 (2006-2008)                  |
| <b>Types of control*, N (%)</b>                                    |                                   |
| Sham acupuncture                                                   | 34 (37%)                          |
| Active acupuncture                                                 | 14 (15%)                          |
| Non-acupuncture                                                    | 68 (74%)                          |
| <b>Clinical heterogeneity related to acupuncture</b>               |                                   |
| Investigated                                                       | 12 (48%)                          |
| in subgroup analysis                                               | 5 (20%)                           |
| in sensitivity analysis                                            | 6 (24%)                           |
| in other analysis                                                  | 8 (32%)                           |
| Not investigated                                                   | 13(52%)                           |

\* Sum of the number of each control group may exceed the total number of included trials, since there are trials that have more than two control groups.

Q1-Q3: interquartile range 1 to 3

Table 2. Response of review authors for the reporting of acupuncture details in the Cochrane review

| N=25      | Q1       | Q2       | Q3       | Q4       |
|-----------|----------|----------|----------|----------|
| Yes       | 11 (44%) | 4 (16%)  | 0 (0%)   | 0 (0%)   |
| No        | 2 (8%)   | 5 (20%)  | 10 (40%) | 8 (32%)  |
| No answer | 12 (48%) | 16 (64%) | 15(60%)  | 17 (68%) |

Q1. Are you aware of any guideline or recommendation for reporting details of acupuncture treatment in journal publication?

Q2. Have you ever referred or used any reporting guidelines or recommendations when you reported the details of acupuncture treatments in your Cochrane review?

Q3. Have you ever received any guideline or recommendation for reporting details of acupuncture treatment from the Cochrane review group, when writing or updating your review?

Q4. Have you ever received any constraints or restrictions when reporting the details of acupuncture treatments in your Cochrane review?

Table 3. The number of component studies in Cochrane reviews and of original RCTs with reporting of selected STRICTA items

| Items                                   | Component studies<br>in Cochrane reviews |        | Original RCTs |        | *Difference (95% CI) |
|-----------------------------------------|------------------------------------------|--------|---------------|--------|----------------------|
|                                         | n/N                                      | (%)    | n/N           | %      |                      |
| <b>A. Acupuncture rationale</b>         |                                          |        |               |        |                      |
| 1. Style of acupuncture treatment       | 59/92                                    | (64.1) | 66/92         | (71.7) | 7.6 [1.1, 14.1]      |
| 2. Reasoning of treatment               | 6/92                                     | (6.5)  | 42/92         | (45.6) | 39.1 [28.1, 50.2]    |
| 3. Extent to which treatment was varied | 76/92                                    | (82.6) | 87/92         | (94.6) | 12.0 [4.2, 19.5]     |
| Total section A.                        |                                          |        |               |        |                      |
| <b>B. Needling details</b>              |                                          |        |               |        |                      |
| 1. Number of needles                    | 76/92                                    | (82.6) | 84/92         | (91.3) | 8.7 [1.9, 15.5]      |
| 2. Names of points                      | 74/92                                    | (80.4) | 84/92         | (91.3) | 10.9 [2.7, 19.0]     |
| 4. Depths of insertion                  | 36/92                                    | (39.1) | 41/92         | (44.6) | 5.4 [-7.1, 17.9]     |
| 5. Response to needle                   | 53/92                                    | (57.6) | 63/92         | (68.5) | 10.9 [0.0, 21.7]     |
| 6. Needle stimulation                   | 42/92                                    | (45.7) | 64/92         | (69.6) | 23.9 [13.6, 34.2]    |
| 8. Retention time                       | 69/92                                    | (75.0) | 81/92         | (88.0) | 13.0 [4.4, 21.6]     |
| 9. Needle type                          | 18/92                                    | (19.6) | 60/92         | (65.2) | 45.7 [34.4, 56.9]    |
| Total section B.                        |                                          |        |               |        |                      |
| <b>C. Treatment regimen</b>             |                                          |        |               |        |                      |
| 1. Number of sessions                   | 85/92                                    | (92.4) | 90/92         | (97.8) | 5.4 [-0.3, 11.2]     |
| 2. Frequency/Duration                   | 85/92                                    | (92.4) | 88/92         | (95.7) | 3.3 [-2.5, 9.1]      |
| Total Section C.                        |                                          |        |               |        |                      |
| <b>D. Treatment context</b>             |                                          |        |               |        |                      |
| 1. Details of other treatments          | 15/92                                    | (16.3) | 31/92         | (33.7) | 17.4 [8.6, 26.2]     |
| 2. Setting and context                  | 2/92                                     | (2.2)  | 19/92         | (20.7) | 18.5 [9.5, 27.5]     |
| Total Section D.                        |                                          |        |               |        |                      |
| <b>E. Practitioner background</b>       |                                          |        |               |        |                      |
| 1. Description of acupuncturists        | 56/92                                    | (60.9) | 51/92         | (55.4) | -5.4 [-15.2, -4.4]   |

Abbreviation; RCTs, randomized controlled trials

\*: Higher number means favorable results to RCTs.

1  
2  
3  
4  
5  
6  
7  
8  
9  
10  
11  
12  
13  
14  
15  
16  
17  
18  
19  
20  
21  
22  
23  
24  
25  
26  
27  
28  
29  
30  
31  
32  
33  
34  
35  
36  
37  
38  
39  
40  
41  
42  
43  
44  
45  
46  
47  
48  
49  
50  
51  
52  
53  
54  
55  
56  
57  
58  
59  
60

Figure 1. Flowchart of Cochrane reviews and component study selections  
CDSR; Cochrane database of systematic reviews

Figure 2. The number of reported items of STRICTA in Cochrane reviews of acupuncture and  
related RCTs

RCT; Randomized controlled trial

For peer review only

1  
2  
3  
4  
5  
6  
7  
8  
9  
10  
11  
12  
13  
14  
15  
16  
17  
18  
19  
20  
21  
22  
23  
24  
25  
26  
27  
28  
29  
30  
31  
32  
33  
34  
35  
36  
37  
38  
39  
40  
41  
42  
43  
44  
45  
46  
47  
48  
49  
50  
51  
52  
53  
54  
55  
56  
57  
58  
59  
60

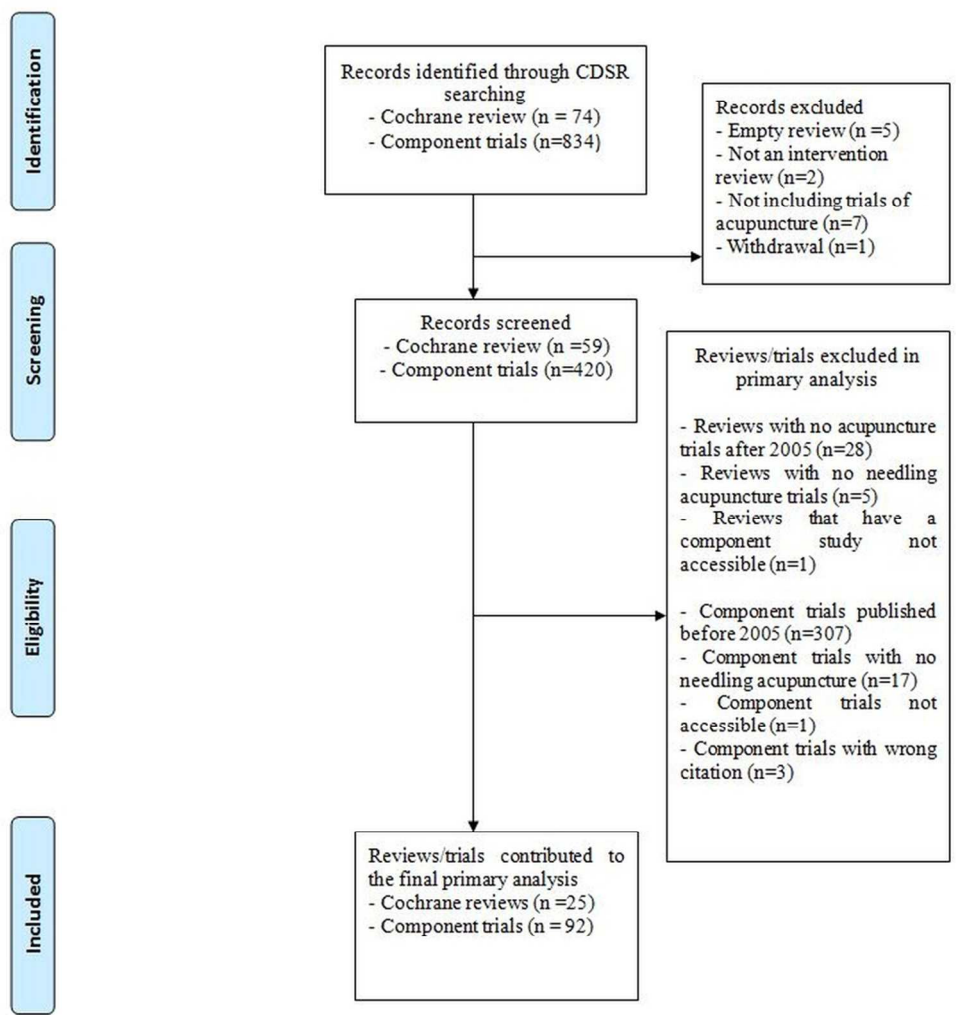

Flowchart of Cochrane reviews and component study selections  
90x93mm (300 x 300 DPI)

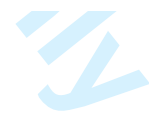

1  
2  
3  
4  
5  
6  
7  
8  
9  
10  
11  
12  
13  
14  
15  
16  
17  
18  
19  
20  
21  
22  
23  
24  
25  
26  
27  
28  
29  
30  
31  
32  
33  
34  
35  
36  
37  
38  
39  
40  
41  
42  
43  
44  
45  
46  
47  
48  
49  
50  
51  
52  
53  
54  
55  
56  
57  
58  
59  
60

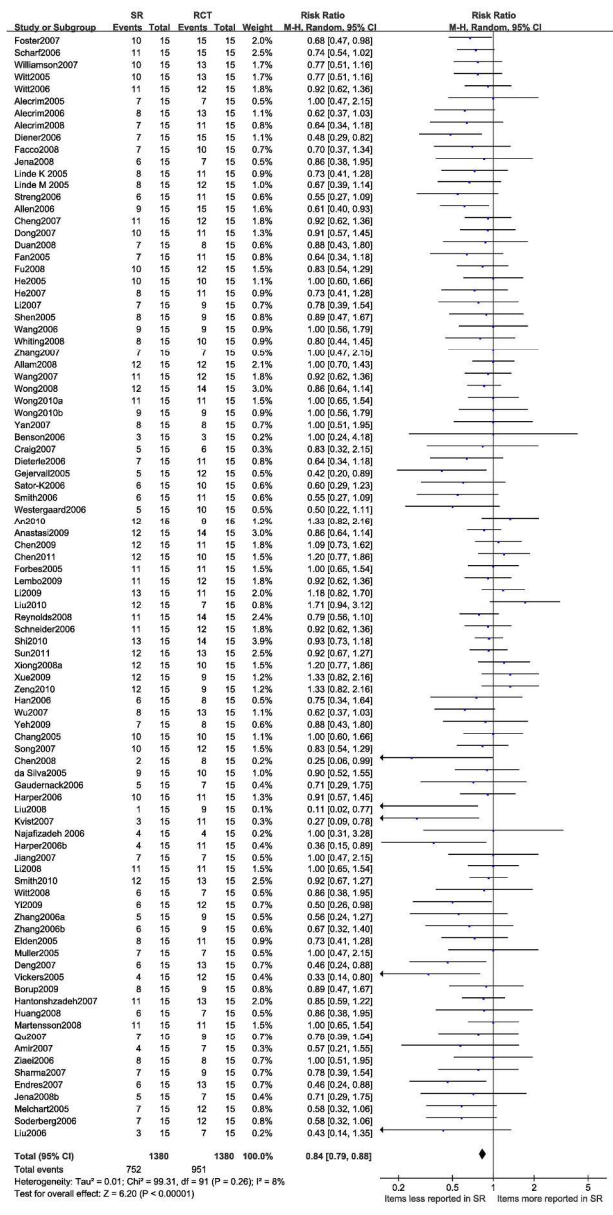

The number of reported items of STRICTA in Cochrane reviews of acupuncture and related RCTs  
264x522mm (300 x 300 DPI)



1  
2  
3  
4 **Appendix 1.** Cochrane reviews of acupuncture and relevant primary randomized controlled  
5 trials included in the analysis  
6  
7  
8

9  
10 **Included Cochrane reviews of acupuncture**

- 11 1. Cheong YC, HungYuNg E, Ledger WL. Acupuncture and assisted conception. Cochrane  
12 Database Syst Rev. 2008; **4**: CD006920.  
13  
14 2. White AR, Rampes H, Liu JP, Stead LF, Campbell J. Acupuncture and related interventions  
15 for smoking cessation. Cochrane Database Syst Rev. 2011; **1**: CD000009.  
16  
17 3. Wong V, Cheuk DK, Lee S, Chu V. Acupuncture for acute management and rehabilitation  
18 of traumatic brain injury. Cochrane Database Syst Rev. 2011; **5**: CD007700.  
19  
20 4. Cheuk DK, Wong V, Chen WX. Acupuncture for autism spectrum disorders (ASD).  
21 Cochrane Database Syst Rev. 2011; **9**: CD007849.  
22  
23 5. Paley CA, Johnson MI, Tashani OA, Bagnall AM. Acupuncture for cancer pain in adults.  
24 Cochrane Database Syst Rev. 2011; **1**: CD007753.  
25  
26 6. McCarney RW, Brinkhaus B, Lasserson TJ, Linde K. Acupuncture for chronic asthma.  
27 Cochrane Database Syst Rev. 2004; **1**: CD000008.  
28  
29 7. Smith CA, Hay PP, Macpherson H. Acupuncture for depression. Cochrane Database Syst  
30 Rev. 2010; **1**: CD004046.  
31  
32 8. Smith CA, Zhu X, He L, Song J. Acupuncture for dysmenorrhoea. Cochrane Database Syst  
33 Rev. 2011; **1**: CD007854.  
34  
35 9. Cheuk DK, Wong V. Acupuncture for epilepsy. Cochrane Database Syst Rev. 2008; **4**:  
36 CD005062.  
37  
38 10. Smith CA, Crowther CA. Acupuncture for induction of labour. Cochrane Database Syst  
39 Rev. 2004; **1**: CD002962.  
40  
41 11. Cheuk DK, Yeung WF, Chung KF, Wong V. Acupuncture for insomnia. Cochrane  
42 Database Syst Rev. 2007; **3**: CD005472.  
43  
44 12. Linde K, Allais G, Brinkhaus B, Manheimer E, Vickers A, White AR. Acupuncture for  
45 migraine prophylaxis. Cochrane Database Syst Rev. 2009; **1**: CD001218.  
46  
47 13. Manheimer E, Cheng K, Linde K, Lao L, Yoo J, Wieland S, et al. Acupuncture for  
48 peripheral joint osteoarthritis. Cochrane Database Syst Rev. 2010; **1**: CD001977.  
49  
50 14. Linde K, Allais G, Brinkhaus B, Manheimer E, Vickers A, White AR. Acupuncture for  
51 tension-type headache. Cochrane Database Syst Rev. 2009; **1**: CD007587.  
52  
53 15. Manheimer E, Cheng K, Wieland LS, Min LS, Shen X, Berman BM, et al. Acupuncture  
54  
55  
56  
57  
58  
59  
60

- 1  
2  
3  
4 for treatment of irritable bowel syndrome. *Cochrane Database Syst Rev.* 2012; **5**: CD005111.
- 5  
6 16. Smith CA, Collins CT, Crowther CA, Levett KM. Acupuncture or acupressure for pain  
7 management in labour. *Cochrane Database Syst Rev.* 2011; **7**: CD009232.
- 8  
9 17. Waseem Z, Boulias C, Gordon A, Ismail F, Sheean G, Furlan AD. Botulinum toxin  
10 injections for low-back pain and sciatica. *Cochrane Database Syst Rev.* 2011; **1**: CD008257.
- 11  
12 18. Dowswell T, Kelly AJ, Livio S, Norman JE, Alfirevic Z. Different methods for the  
13 induction of labour in outpatient settings. *Cochrane Database Syst Rev.* 2010; **8**: CD007701.
- 14  
15 19. Pennick VE, Young G. Interventions for preventing and treating pelvic and back pain in  
16 pregnancy. *Cochrane Database Syst Rev.* 2007; **2**: CD001139.
- 17  
18 20. Gross A, Miller J, D'Sylva J, Burnie SJ, Goldsmith CH, Graham N, et al. Manipulation or  
19 Mobilisation for Neck Pain. *Cochrane Database Syst Rev.* 2010; **1**: CD004249.
- 20  
21 21. Rada G, Capurro D, Pantoja T, Corbalán J, Moreno G, Letelier LM, et al. Non-hormonal  
22 interventions for hot flushes in women with a history of breast cancer. *Cochrane Database*  
23 *Syst Rev.* 2010; **9**: CD004923.
- 24  
25 22. Bausewein C, Booth S, Gysels M, Higginson I. Non-pharmacological interventions for  
26 breathlessness in advanced stages of malignant and non-malignant diseases. *Cochrane*  
27 *Database Syst Rev.* 2008; **2**: CD005623.
- 28  
29 23. Lee A, Fan LT. Stimulation of the wrist acupuncture point P6 for preventing postoperative  
30 nausea and vomiting. *Cochrane Database Syst Rev.* 2009; **2**: CD003281.
- 31  
32 24. Thomas LH, Cross S, Barrett J, French B, Leathley M, Sutton CJ, et al. Treatment of  
33 urinary incontinence after stroke in adults. *Cochrane Database Syst Rev.* 2008; **1**: CD004462.
- 34  
35 25. Mangesi L, Dowswell T. Treatments for breast engorgement during lactation. *Cochrane*  
36 *Database Syst Rev.* 2010; **9**: CD006946.
- 37  
38  
39  
40  
41  
42  
43  
44  
45  
46  
47  
48  
49  
50  
51  
52  
53  
54  
55  
56  
57  
58  
59  
60

**Primary randomized controlled trials in included Cochrane reviews of acupuncture\***

1. Benson MR, Elkind-Hirsch KE, Theall A, Fong K, Hogan RB, Scott RT. Impact of acupuncture before and after embryo transfer on the outcome of in vitro fertilization cycles: A prospective single blind randomized study. *Fertil Steril* 2006;86(Suppl(3)):135.
2. Craig LB, Criniti AR, Hansen KR, Marshall LA, Soules MR. Acupuncture lowers pregnancy rates when performed before and after embryo transfer. *Fertil Steril* 2007;88(Suppl(1)):40.
3. Gejervall A, Stener-Victorin E, Moller A, Janson PO, Werner C, Bergh C. Electro-acupuncture versus conventional analgesia: a comparison of pain levels during oocyte aspiration and patients' experiences of well-being after surgery. *Hum Reprod* 2005;20(3):728-35.
4. Sator-Katzenschlager SM, Wölfler MM, Kozek-Langenecker SA, Sator K, Sator PG, Li B, et al. Auricular electro-acupuncture as an additional perioperative analgesic method during oocyte aspiration in IVF treatment. *Hum Reprod* 2006;21(8):2114-20.
5. Smith C, Coyle M, Norman RJ. Influence of acupuncture stimulation on pregnancy rates for women undergoing embryo transfer. *Fertil Steril* 2006;85(5):1352-58.
6. Westergaard LG, Mao Q, Kroglund M, Sandrini S, Lenz S, Grinsted J. Acupuncture on the day of embryo transfer significantly improves the reproductive outcome in infertile women: a prospective, randomized trial. *Fertil Steril* 2006;85(5):1341-46.
7. Dieterle S, Ying G, Hatzmann W, Neuer A. Effect of acupuncture on the outcome of in vitro fertilisation and intracytoplasmic sperm injection: a randomised, prospective, controlled clinical study. *Fertil Steril* 2006;85(5):1347-51.
8. Han Y. Combining of acupuncture and auricular points applying for treatment of 42 cases of tobacco withdrawal syndrome. *Journal of Clinical Acupuncture and Moxibustion* 2006;22(11):16.
9. Wu TP, Chen FP, Liu JY, Lin MH, Hwang SJ. A randomized controlled clinical trial of auricular acupuncture in smoking cessation. *J Chin Med Assoc* 2007;70(8):331-38.
10. Yeh ML, Chang CY, Chu NF, Chen HH. A six-week acupoint stimulation intervention for quitting smoking. *Am J Chin Med* 2009;37(5):829-36.
11. Chang ZJ, Liu P, Gan L. Rehabilitation and acupuncture treatment for patients with traumatic brain injury. *Chinese Journal of Medical Device* 2005;18(5):38-39.
12. Song YJ, Zhang L, Zhou YQ. Observations on the efficacy of electroacupuncture-assisted treatment for resuscitating coma patients with serious brain trauma. *Shanghai Journal of*

1  
2  
3  
4  
5  
6  
7  
8  
9  
10  
11  
12  
13  
14  
15  
16  
17  
18  
19  
20  
21  
22  
23  
24  
25  
26  
27  
28  
29  
30  
31  
32  
33  
34  
35  
36  
37  
38  
39  
40  
41  
42  
43  
44  
45  
46  
47  
48  
49  
50  
51  
52  
53  
54  
55  
56  
57  
58  
59  
60

Acupuncture and Moxibustion 2007;26(4):11-12.

13. Allam H, ElDine NG, Helmy G. Scalp acupuncture effect on language development in children with autism: a pilot study. *J Altern Complement Med* 2008;14(2):109-14.

14. Wang CN, Liu Y, Wei XH, Li LX. Effects of electroacupuncture combined with behavior therapy on intelligence and behavior of children of autism. *Zhongguo Zhen Jiu* 2007;27(9):660-62. [Article in Chinese].

15. Wong CL. Acupuncture and autism spectrum disorders - an assessor-blinded randomized controlled trial (M Phil). University of Hong Kong 2008:1-192.

16. Wong VC, Chen WX. Randomized controlled trial of electro-acupuncture for autism spectrum disorder. *Altern Med Rev* 2010;15(2):136-46.

17. Wong VC, Sun JG. Randomized controlled trial of acupuncture versus sham acupuncture in autism spectrum disorder. *J Altern Complement Med* 2010;16(5):545-53.

18. Yan YF, Wei YY, Chen YH, Chen MM. Effect of acupuncture on rehabilitation training of child's autism. *Zhongguo Zhen Jiu* 2007;27(7):503-05. [Article in Chinese].

19. Chen ZJ, Guo YP, Wu ZC. Observation on the therapeutic effect of acupuncture at pain points on cancer pain. *Zhongguo Zhen Jiu* 2008;28(4):251-53.

20. Najafizadeh K, Vosughian M, Rasaian N, Sohrabpour H, Derakhshan\_Deilami M, Ghadiani M, et al. A randomized double blind placebo controlled trial on the short and long term effects of electro acupuncture on moderate to severe asthma. *European Respiratory Journal* 2006;28(Suppl 50):502s.

21. Allen JJ, Schnyer RN, Chambers AS, Hitt SK, Moreno FA, Manber R. Acupuncture for depression: a randomized controlled trial. *J Clin Psychiatry* 2006;67(11):1665-73.

22. Cheng Y, Tang QS. Abdominal acupuncture in treating liver-qi stagnation and spleen deficiency in the elderly with post-stroke depression: A randomized and controlled observation. *Chinese Journal of Clinical Rehabilitation Tissue Engineering Research* 2007;11(39):7791-94.

23. Dong JP, Sun WY, Wang S, Wu ZQ, Liu F. Clinical observation on head point-through-point electroacupuncture for treatment of poststroke depression. *Zhongguo Zhen Jiu* 2007;27(4):241-44. [Article in Chinese].

24. Duan M, Tu Y, Chen LP. Assessment of effectiveness of electroacupuncture and fluoxetine for treatment of depression with physical symptoms. *Chinese Acupuncture and Moxibustion* 2008;28(3):167-70. [Article in Chinese].

25. Fan L, Fu WB, Meng CR, Zhu XP, Mi JP, Li WX, et al. Effect of acupuncture at routine

- 1  
2  
3  
4  
5  
6  
7  
8  
9  
10  
11  
12  
13  
14  
15  
16  
17  
18  
19  
20  
21  
22  
23  
24  
25  
26  
27  
28  
29  
30  
31  
32  
33  
34  
35  
36  
37  
38  
39  
40  
41  
42  
43  
44  
45  
46  
47  
48  
49  
50  
51  
52  
53  
54  
55  
56  
57  
58  
59  
60
- acupoint and no-acupoint on depressive neurosis evaluated by Hamilton depression scale. Chinese Journal of Clinical Rehabilitation 2005;9(28):14-16. [Article in Chinese].
26. Fu WB, Fan L, Zhu XP, He Q, Wang L, Zhuang LX, et al. Acupuncture for treatment of depressive neurosis: a multi-center randomized controlled study. Zhongguo Zhen Jiu 2008;28(1):3-6.
27. He J, Shen PF. Clinical study on the therapeutic effect of acupuncture in the treatment of post-stroke depression. Acupuncture Research 2007;32(1):58-61.
28. He XJ, Tan JL, Wang BG, Lai YY. Effects of acupuncture using XingnaoKaiqiao (consciousness restoring resuscitation) needling method on acupuncture with post stroke depression. Chinese Journal of Rehabilitation, Theory and Practice 2005;11(6):467-68.
29. Li SJ, Liu T. Clinical observation on treatment of melancholia by acupuncture following principle of relieving depression and regulating mentality. Chinese Journal of Integrated Traditional and Western Medicine 2007;27(2):155-57.
30. Shen PF, Kong L, Shi XM. Study on clinical therapeutic effect of activating brain and regaining consciousness needling method on post-stroke depressing and the mechanism. Zhongguo Zhen Jiu 2005;25(1):11-13.
31. Wang J, Jiang JF, Wang LL. Clinical observation on governor vessel Daoqi method for treatment of dyssomnia in the patient of depression. Zhongguo Zhen Jiu 2006;26(5):328-30.
32. Whiting M, Leavey G, Scammell A, Au S, King M. Using acupuncture to treat depression: a feasibility study. Complement Ther Med 2008;16(2):87-91.
33. Zhang GJ, Shi ZY, Liu S, Gong SH, Liu JQ, Liu JS. Clinical observation on treatment of depression by electro-acupuncture combined with Paroxetine. Chin J Integr Med 2007;13(3):228-30.
34. Jiang LY. Clinical experience for the treatment of 34 cases of primary dysmenorrhoea. Journal of Emergency in Traditional Chinese Medicine 2007;16(5):620-21.
35. Li CH, Wang YZ, Ge XX. Clinical observation of the use of acupuncture on 4 gate points for primary dysmenorrhoea. Journal Chinese Acupuncture and Moxibustion 2008;28(3):187-90.
36. Smith CA, Crowther CA, Petrucco O, Beilby J, Dent H. Acupuncture to treat primary dysmenorrhea in women: a randomised controlled trial. Evid Based Complement Alternat Med 2010;2011:612464.
37. Witt CM, Reinhold T, Brinkhaus B, Roll S, Jena S, Willich SN. Acupuncture in patients with dysmenorrhea: a randomized study on clinical effectiveness and cost-effectiveness in

1  
2  
3  
4  
5 usual care. *Am J ObstetGynecol* 2008;198(2):166.e1-66.e8.

6  
7 38. Zhi LX. Randomized controlled study on superficial needling for treatment of primary  
8  
9 dysmenorrhea. *Zhongguo Zhen Jiu* 2007;27(1):18-21.

10  
11 39. Yi HL. Observation of electro-acupuncture treatment of vasoconstriction district for grand  
12  
13 mal seizures. Thesis (M. Phil.). Guangzhou University of Traditional Chinese Medicine  
14  
15 2009:1-36.

16  
17 40. Zhang J. Study of curative effect of generalized tonic-clonic seizure (GTCS) treated by  
18  
19 catgut implantation at acupoint. Thesis (M. Phil.). Guangzhou University of Traditional  
20  
21 Chinese Medicine 2006;1-41.

22  
23 41. Zhang J, Li Y, Zhuang L. Clinical observation on catgut implantation at acupoint for  
24  
25 treatment of generalised tonic clonic epilepsy. Report of 90 cases. *Journal of Clinical*  
26  
27 *Acupuncture and Moxibustion* 2006;22(6):8-10.

28  
29 42. Gaudernack LC, Forbord S, Hole E. Acupuncture administered after spontaneous rupture  
30  
31 of membranes at term significantly reduces the length of birth and use of oxytocin. A  
32  
33 randomized controlled trial. *ActaObstetGynecolScand* 2006;85(11):1348-53.

34  
35 43. Harper TC, Coeytaux RR, Chen W, Campbell K, Kaufman JS, Moise KJ, et al. A  
36  
37 randomized controlled trial of acupuncture for initiation of labor in nulliparous women. *J*  
38  
39 *Matern Fetal Neonatal Med* 2006;19(8):465-70.

40  
41 44. daSilva JB, Nakamura MU, Cordeiro JA, Kulay LJ. Acupuncture for insomnia in  
42  
43 pregnancy--a prospective, quasi-randomised, controlled study. *Acupunct Med* 2005;23(2):47-  
44  
45 51.

46  
47 45. Alecrim-Andrade J, Maciel-Júnior JA, Carnè X, Severino\_Vasconcelos GM, Correa-Filho  
48  
49 HR. Acupuncture in migraine prevention: a randomized sham controlled study with 6-months  
50  
51 posttreatment follow-up. *Clin J Pain* 2008;24(2):98-105.

52  
53 46. Alecrim-Andrade J, Maciel-Júnior JA, Cladellas XC, Correa-Filho HR, Machado HC.  
54  
55 Acupuncture in migraine prophylaxis: a randomized sham-controlled trial. *Cephalalgia*  
56  
57 2006;26(5):520-29.

58  
59 47. Alecrim-Andrade J, Maciel-Júnior JA, Cladellas XC, Correa-Filho HR, Machado HC,  
60  
61 Vasconcelos GMS. Efficacy of acupuncture in migraine attack prophylaxis: a randomized  
62  
63 sham-controlled trial. *Cephalalgia* 2005;25(10):942.

64  
65 48. Diener HC, Kronfeld K, Boewing G, Lungenhausen M, Maier C, Molsberger A, et al.  
66  
67 Efficacy of acupuncture for the prophylaxis of migraine: a multicentrerandomised controlled  
68  
69 clinical trial. *Lancet Neurol* 2006;5(4):310-16.

- 1  
2  
3  
4  
5 49. Facco E, Liguori A, Petti F, Zanette G, Coluzzi F, De\_Nardin M, et al. Traditional  
6 acupuncture in migraine: a controlled, randomized study. *Headache* 2008;48(3):398-407.  
7  
8 50. Jena S, Witt CM, Brinkhaus B, Wegscheider K, Willich SN. Acupuncture in patients with  
9 headache. *Cephalalgia* 2008;28(9):969-79.  
10  
11 51. Linde K, Streng A, Hoppe A, Brinkhaus B, Witt CM, Hammes M, et al. Treatment in a  
12 randomized multicenter trial of acupuncture for migraine (ART migraine). *Forsch*  
13 *Komplementmed* 2006;13(2):101-08.  
14  
15 52. Linde K, Streng A, Jürgens S, Hoppe A, Brinkhaus B, Witt C, et al. Acupuncture for  
16 patients with migraine: a randomized controlled trial. *JAMA* 2005;293(17):2118-25.  
17  
18 53. Linde M, Fjell A, Carlsson J, Dahlöf C. Role of the needling per se in acupuncture as  
19 prophylaxis for menstrually related migraine: a randomized placebo-controlled study.  
20 *Cephalalgia* 2005;25(1):41-47.  
21  
22 54. Melchart D, Linde K, Streng A, Reitmayr S, Hoppe A, Brinkhaus B, et al. Acupuncture  
23 Randomized Trials (ART) in patients with migraine or tension-type headache--design and  
24 protocols. *Forsch Komplementarmed Klass Naturheilkd* 2003;10(4):179-84.  
25  
26 55. Molsberger AF, Boewing G, Diener HC, Endres HG, Kraehmer N, Kronfeld K, et al.  
27 Designing an acupuncture study: the nationwide, randomized, controlled, German  
28 acupuncture trials on migraine and tension-type headache. *J Altern Complement Med*  
29 2006;12(3):237-45.  
30  
31 56. Streng A, Linde K, Hoppe A, Pfaffenrath V, Hammes M, Wagenpfeil S, et al.  
32 Effectiveness and tolerability of acupuncture compared with metoprolol in migraine  
33 prophylaxis. *Headache* 2006;46(10):1492-502.  
34  
35 57. Jena S, Witt C, Brinkhaus B, Selim D, Willich SN. Effectiveness of acupuncture  
36 treatment for headache - the Acupuncture in Routine Care Study (ARC-Headache). *Focus on*  
37 *Alternative and Complementary Therapies* 2004;9:Suppl:17.  
38  
39 58. Foster NE, Thomas E, Barlas P, Hill JC, Young J, Mason E, et al. Acupuncture as an  
40 adjunct to exercise based physiotherapy for osteoarthritis of the knee: randomised controlled  
41 trial. *BMJ* 2007;335(7617):436.  
42  
43 59. Scharf HP, Mansmann U, Streitberger K, Witte S, Krämer J, Maier C, et al. Acupuncture  
44 and knee osteoarthritis: a three-armed randomized trial. *Ann Intern Med* 2006;145(1):12-20.  
45  
46 60. Streitberger K, Witte S, Mansmann U, Knauer C, Krämer J, Scharf HP, et al. Efficacy and  
47 safety of acupuncture for chronic pain caused by gonarthrosis: a study protocol of an ongoing  
48 multi-centrerandomised controlled clinical trial [ISRCTN27450856]. *BMC Complement*  
49  
50  
51  
52  
53  
54  
55  
56  
57  
58  
59  
60

1  
2  
3  
4  
5  
6  
7  
8  
9  
10  
11  
12  
13  
14  
15  
16  
17  
18  
19  
20  
21  
22  
23  
24  
25  
26  
27  
28  
29  
30  
31  
32  
33  
34  
35  
36  
37  
38  
39  
40  
41  
42  
43  
44  
45  
46  
47  
48  
49  
50  
51  
52  
53  
54  
55  
56  
57  
58  
59  
60

Altern Med 2004;4:6.

61. Williamson L, Wyatt MR, Yein K, Melton JT. Severe knee osteoarthritis: a randomized controlled trial of acupuncture, physiotherapy (supervised exercise) and standard management for patients awaiting knee replacement. *Rheumatology (Oxford)* 2007;46(9):1445-49.

62. Witt C, Brinkhaus B, Jena S, Linde K, Streng A, Wagenpfeil S, et al. Acupuncture in patients with osteoarthritis of the knee: a randomised trial. *Lancet* 2005;366(9480):136-43.

63. Witt CM, Jena S, Brinkhaus B, Liecker B, Wegscheider K, Willich SN. Acupuncture in patients with osteoarthritis of the knee or hip: a randomized, controlled trial with an additional nonrandomized arm. *Arthritis Rheum* 2006;54(11):3485-93.

64. Endres HG, Böwing G, Diener HC, Lange S, Maier C, Molsberger A, et al. Acupuncture for tension-type headache: a multicentre, sham-controlled, patient-and observer-blinded, randomised trial. *J Headache Pain* 2007;8(5):306-14.

65. Melchart D, Streng A, Hoppe A, Brinkhaus B, Becker-Witt C, Hammes M, et al. The acupuncture randomised trial (ART) for tension-type headache--details of the treatment. *Acupunct Med* 2005;23(4):157-65.

66. Melchart D, Streng A, Hoppe A, Brinkhaus B, Witt C, Wagenpfeil S, et al. Acupuncture in patients with tension-type headache: randomised controlled trial. *BMJ* 2005;331(7513):376-82.

67. Söderberg E, Carlsson J, Stener-Victorin E. Chronic tension-type headache treated with acupuncture, physical training and relaxation training. Between-group differences. *Cephalalgia* 2006;26(11):1320-29.

68. An GQ, Li N, Zhai GH, Liu HR, Sun JF, Liang HF, et al. Evaluation of the therapeutic effect of acupuncture and moxibustion on irritable bowel syndrome. *Shanghai Journal of Acupuncture and Moxibustion* 2010;29(6):354-56.

69. Anastasi JK, McMahon DJ, Kim GH. Symptom management for irritable bowel syndrome: a pilot randomized controlled trial of acupuncture/moxibustion. *Gastroenterol Nurs* 2009;32(4):243-55.

70. Chen Q. Clinical study on irritable bowel syndrome of diarrhea type with Chang-three-needle technique. Master's thesis of Guangzhou University of Traditional Chinese Medicine 2011:1-29.

71. Chen Y. Clinical reseach on treating irritable bowel syndrome mainly by acupuncture with warmed needles at Tiansh (ST25) and Dangchangshu (BL25). Master's thesis of



1  
2  
3  
4  
5  
6  
7  
8  
9  
10  
11  
12  
13  
14  
15  
16  
17  
18  
19  
20  
21  
22  
23  
24  
25  
26  
27  
28  
29  
30  
31  
32  
33  
34  
35  
36  
37  
38  
39  
40  
41  
42  
43  
44  
45  
46  
47  
48  
49  
50  
51  
52  
53  
54  
55  
56  
57  
58  
59  
60

Guangzhou University of Traditional Chinese Medicine 2009:1-32.

72. Chen YQ, Lai XS. Clinical observation on combined warming needle and patented Chinese medicine for irritable bowel syndrome. *Journal of Acupuncture and Tuina Science* 2009;7:274-77.

73. Forbes A, Jackson S, Walter C, Quraishi S, Jacyna M, Pitcher M. Acupuncture for irritable bowel syndrome: a blinded placebo-controlled trial. *World J Gastroenterol* 2005;11(26):4040-44.

74. Lembo AJ, Conboy L, Kelley JM, Schnyer RS, McManus CA, Quilty MT, et al. A treatment trial of acupuncture in IBS patients. *Am J Gastroenterol* 2009;104(6):1489-97.

75. Li W. Treatment of warming needle moxibustion combined with spinal manipulation on irritable bowel syndrome. *China Practical Medicine* 2009;4(31):212-13.

76. Liu Q, Wang Z, Zhang W, Zhang X. Clinical observation on Geshanxiaoyao Decoction combining acupuncture effect on the life quality of patients with irritable bowel syndrome. *Journal of Zhejiang University of Traditional Chinese Medicine* 2010;34(4):510-11, 13.

77. Reynolds JA, Bland JM, MacPherson H. Acupuncture for irritable bowel syndrome an exploratory randomised controlled trial. *Acupunct Med* 2008;26(1):8-16.

78. Schneider A, Enck P, Streitberger K, Weiland C, Bagheri S, Witte S, et al. Acupuncture treatment in irritable bowel syndrome. *Gut* 2006;55(5):649-54.

79. Shi X, Luo J, Tan T. Clinical observation of electroacupuncture on diarrhea-predominant irritable bowel syndrome. *Journal of New Chinese Medicine* 2010;42(5):72-74.

80. Sun JH, Wu XL, Xia C, Xu LZ, Pei LX, Li H, et al. Clinical evaluation of soothing Gan and Inbigorating Pi acupuncture treatment on diarrhea-predominant irritable bowel syndrome. *Chin J Integr Med* 2011;17(10):780-85.

81. Wang Z, Liu Q, Zhang X, Wang Y, Su X. Clinical observation of "GeshanXiaoyao Decoction" plus acupuncture in treating diarrhea-predominant irritable bowel syndrome. *Shanghai Journal of Traditional Chinese Medicine* 2010;44(3):41-43.

82. Wang Z, Liu Q, Zhang X, Zhang W. Geshanxiaoyao Decoction combining with acupuncture on 150 patients with diarrhea-predominant irritable bowel syndrome. *Liaoning Journal of Traditional Chinese Medicine* 2010;37(2):276-77.

83. Xiong X, Lin Y. Acupuncture plus traditional Chinese herb medicine in treating 42 patients with diarrhea-predominant IBS. *Journal of Fujian University of TCM* 2008;18(2):38-40.

84. Xue Y, TianX. The clinical research of the relationship between radicals and irritable

1  
2  
3  
4  
5  
6  
7  
8  
9  
10  
11  
12  
13  
14  
15  
16  
17  
18  
19  
20  
21  
22  
23  
24  
25  
26  
27  
28  
29  
30  
31  
32  
33  
34  
35  
36  
37  
38  
39  
40  
41  
42  
43  
44  
45  
46  
47  
48  
49  
50  
51  
52  
53  
54  
55  
56  
57  
58  
59  
60

bowel syndrome and the effect of acupuncture. *Chinese Archives of Traditional Chinese Medicine* 2009;27(1):111-12.

85. Zeng Y, Bao Y, Chu J, Li H, Zhu G, Zhang W. Effect of moxibustion on diarrhea-dominant irritable bowel syndrome patients in dog days. *Chinese Archives of Traditional Chinese Medicine* 2010;28(8):1774-76.

86. Borup L, Wurlitzer W, Hedegaard M, Kesmodel US, Hvidman L. Acupuncture as pain relief during delivery: a randomized controlled trial. *Birth* 2009;36(1):5-12.

87. Hantoushzadeh S, Alhusseini N, Lebaschi AH. The effects of acupuncture during labour on nulliparous women: a randomised controlled trial. *Aust N Z J Obstet Gynaecol* 2007;47(1):26-30.

88. Huang T, Yang Y, Huang X. Selection of acupoints and opportunity for acupuncture analgesia in delivery. *Journal of Traditional Chinese Medicine* 2008;49(7):625-28.

89. Mårtensson L, Stener-Victorin E, Wallin G. Acupuncture versus subcutaneous injections of sterile water as treatment for labour pain. *Acta Obstet Gynecol Scand* 2008;87(2):171-77.

90. Qu F, Zhou J. Electro-acupuncture in relieving labor pain. *Evid Based Complement Alternat Med* 2007;4(1):125-30.

91. Ziaei S, Hajipour L. Effect of acupuncture on labor. *Int J Gynaecol Obstet* 2006;92(1):71-72.

92. Liu Z. Botulinum toxin A (BTX-A) point injection for treatment of the third lumbar transverse process syndrome. *Zhongguo Zhen Jiu* 2008;28(5):337-39.

93. Elden H, Ladfors L, Olsen MF, Ostgaard HC, Hagberg H. Effects of acupuncture and stabilising exercises as adjunct to standard treatment in pregnant women with pelvic girdle pain: randomised single blind controlled trial. *BMJ* 2005;330(7494):761.

94. Muller R, Giles LGF. Long-term follow-up of a randomized clinical trial assessing the efficacy of medication, acupuncture, and spinal manipulation for chronic mechanical spinal pain syndromes. *J Manipulative Physiol Ther* 2005;28(1):3-11.

95. Deng G, Vickers A, Yeung S, D'Andrea GM, Xiao H, Heerdt AS, et al. Randomized, controlled trial of acupuncture for the treatment of hot flashes in breast cancer patients. *J Clin Oncol* 2007;25(35):5584-90.

96. Vickers AJ, Feinstein MB, Deng GE, Cassileth BR. Acupuncture for dyspnea in advanced cancer: a randomized, placebo-controlled pilot trial [ISRCTN89462491]. *BMC Palliat Care* 2005;4:5.

97. Amir SH, Bano S, Khan RM, Ahmed M, Zia F, Nasreen F. Electro-stimulation at P6 for

1  
2  
3  
4 prevention of PONV. *Journal of Anaesthesiology Clinical Pharmacology* 2007;23:383-86.

5  
6 98. Sharma S, Goswami U. Evaluation of acupuncture for anti-emetic prophylaxis. *Journal of*  
7  
8 *Anaesthesiology Clinical Pharmacology* 2007;23:401-04.

9  
10 99. Liu HL, Wang LP. Randomized controlled study on ginger-salt-partitioned moxibustion at  
11  
12 shenque (CV 8) on urination disorders poststroke. *Zhongguo Zhen Jiu* 2006;26(9):621-24.

13  
14 100. Kvist LJ, Hall-Lord ML, Rydhstroem H, Larsson BW. A randomised-controlled trial in  
15  
16 Sweden of acupuncture and care interventions for the relief of inflammatory symptoms of the  
17  
18 breast during lactation. *Midwifery* 2007;23(2):184-95.

19  
20 \* The number of primary studies exceeds 92 because some trials analyzed in Cochrane  
21  
22 reviews had at least two references.  
23  
24  
25  
26  
27  
28  
29  
30  
31  
32  
33  
34  
35  
36  
37  
38  
39  
40  
41  
42  
43  
44  
45  
46  
47  
48  
49  
50  
51  
52  
53  
54  
55  
56  
57  
58  
59  
60
